# Supplementary material
Source: PubMed Central journal article supplement (PMC7301575)
Supplement: ao0c01648_si_001.pdf [file ao0c01648_si_001.pdf]

## Supporting Information

### Impacts of Steric Compression, Protonation, and Intramolecular Hydrogen-Bonding on the $^{15}\text{N}$ NMR spectroscopy of Norditerpenoid Alkaloids and Their Piperidine-Ring Analogues

Ziyu Zeng, Ashraf M. A. Qasem, Timothy J. Woodman, Michael G. Rowan, and Ian S. Blagbrough\*

*Department of Pharmacy and Pharmacology, University of Bath, Bath BA2 7AY, U.K.*

#### Table of Contents

|                               |    |
|-------------------------------|----|
| IR, MS, and NMR spectra ..... | S2 |
|-------------------------------|----|

# IR, MS, and NMR spectra

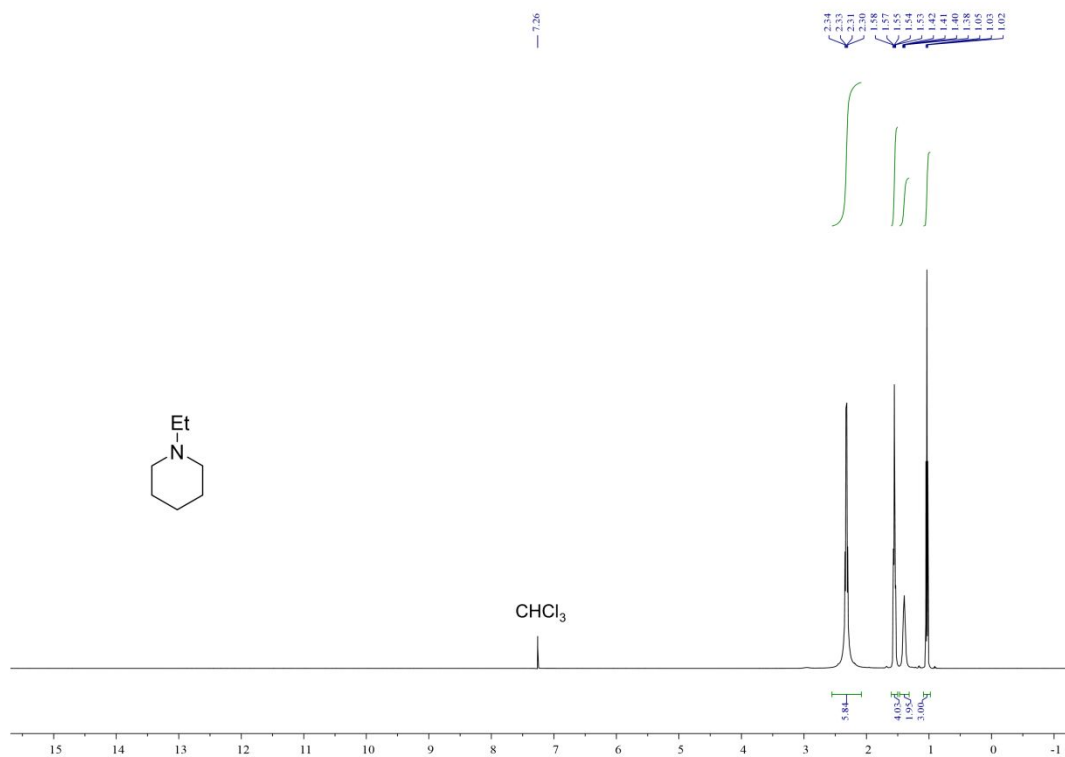

**Figure S1.** <sup>1</sup>H NMR spectrum of *N*-Et piperidine (**1**) in CDCl<sub>3</sub>

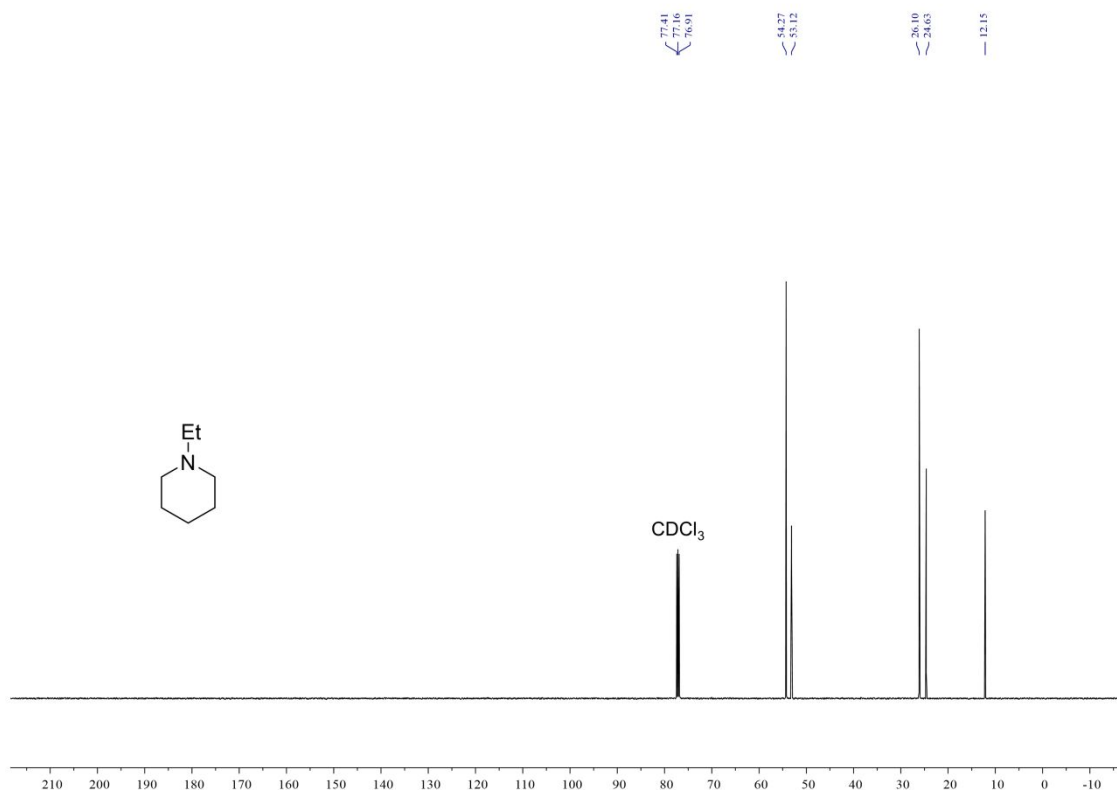

**Figure S2.** <sup>13</sup>C NMR spectrum of *N*-Et piperidine (**1**) in CDCl<sub>3</sub>

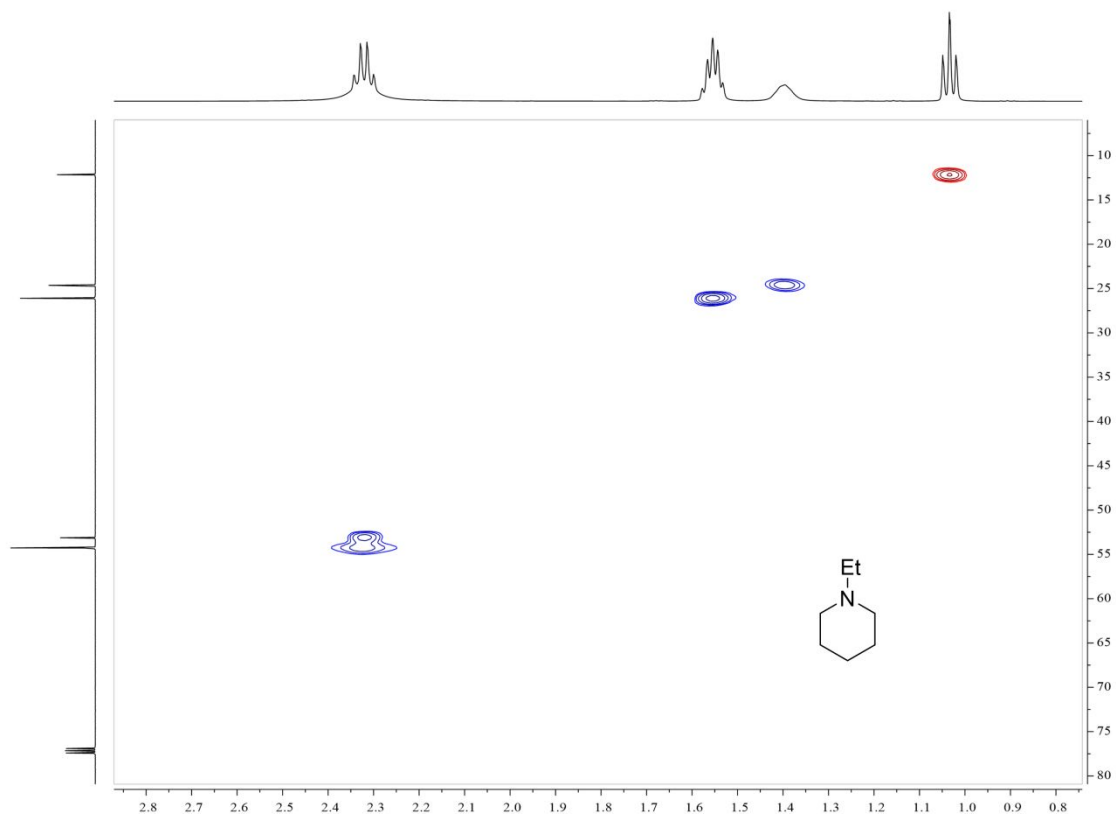

**Figure S3.** HSQC spectrum of *N*-Et piperidine (**1**) in CDCl<sub>3</sub>

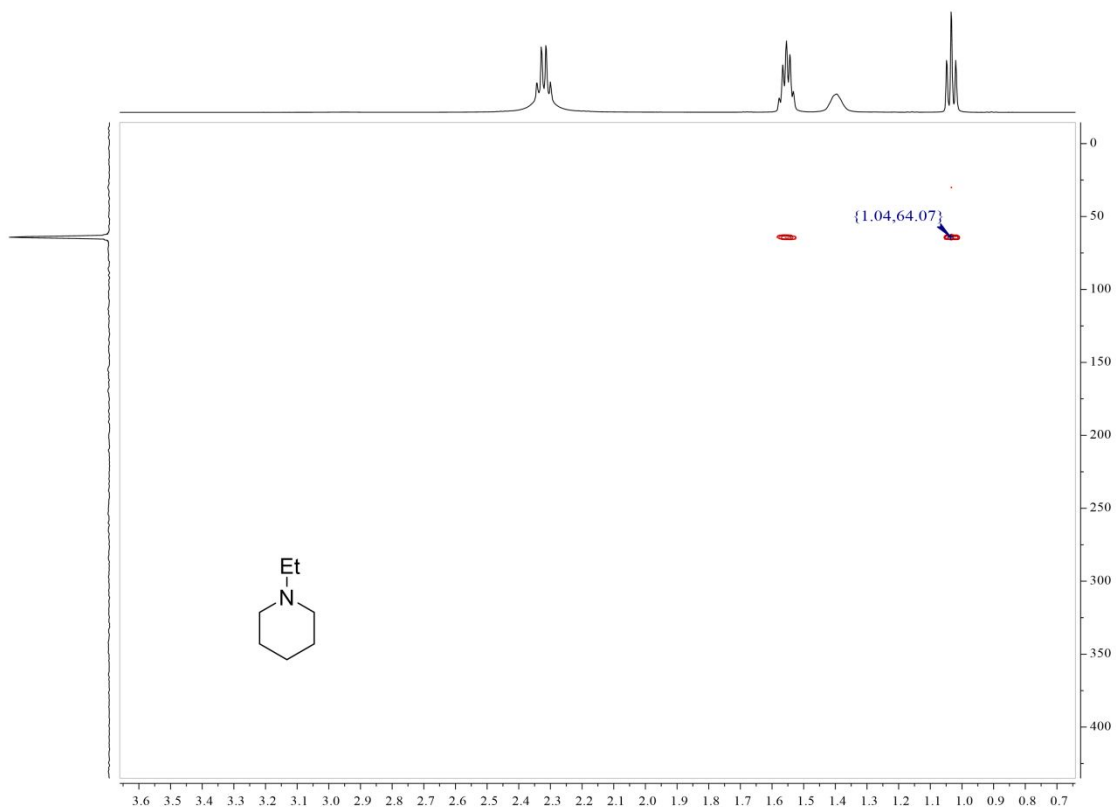

**Figure S4.** <sup>1</sup>H-<sup>15</sup>N HMBC spectrum of *N*-Et piperidine (**1**) in CDCl<sub>3</sub>

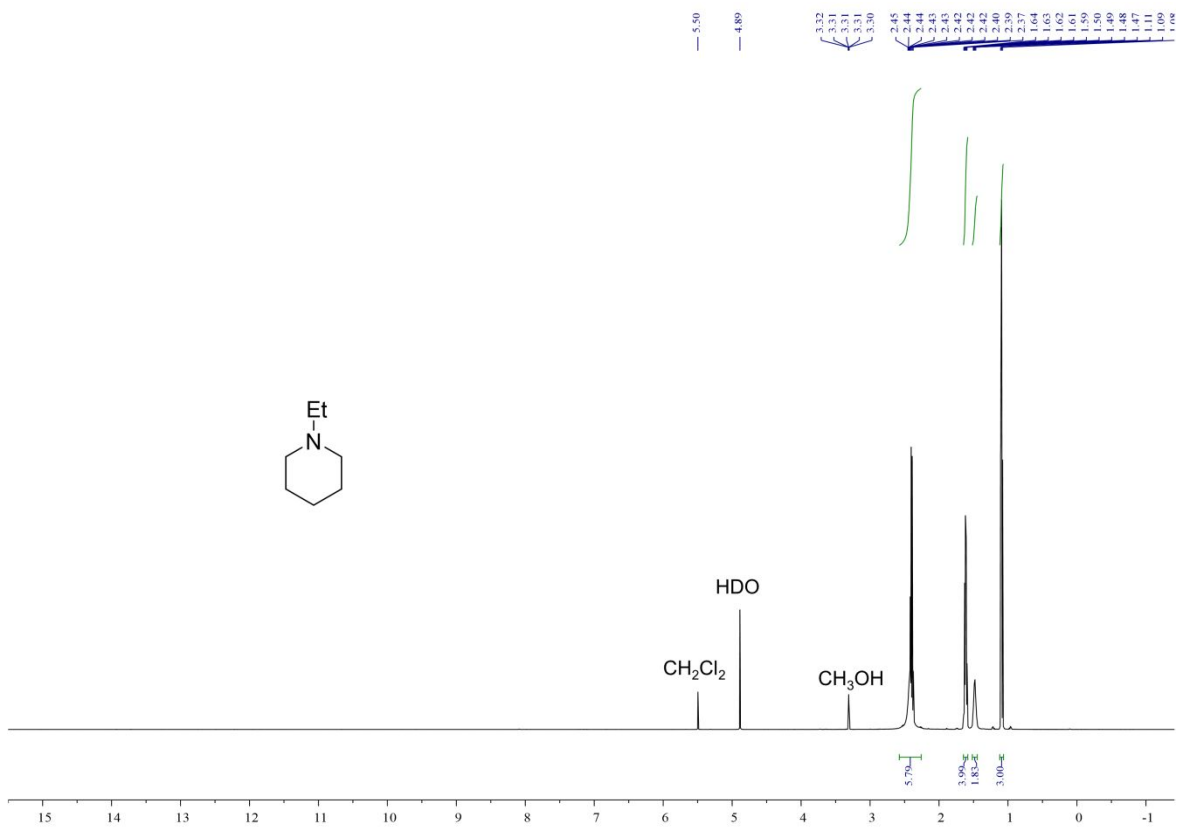

Figure S5. <sup>1</sup>H NMR spectrum of *N*-Et piperidine (1) in CD<sub>3</sub>OD

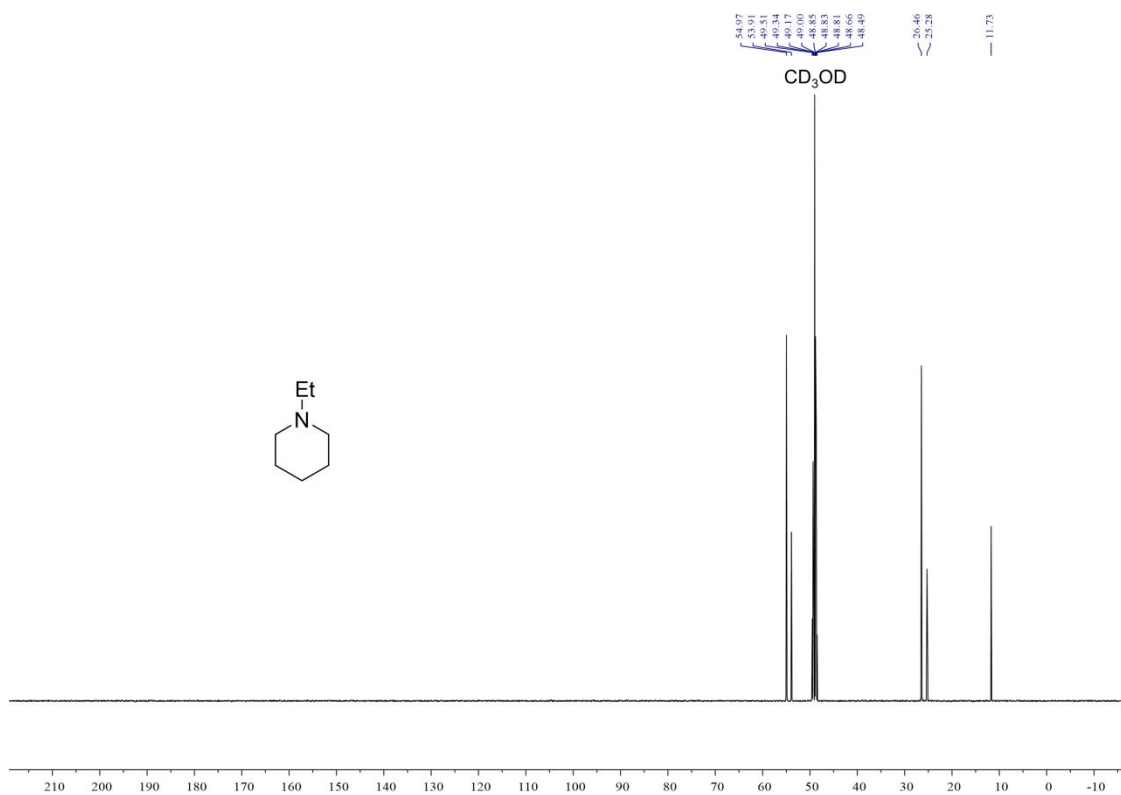

Figure S6. <sup>13</sup>C NMR spectrum of *N*-Et piperidine (1) in CD<sub>3</sub>OD

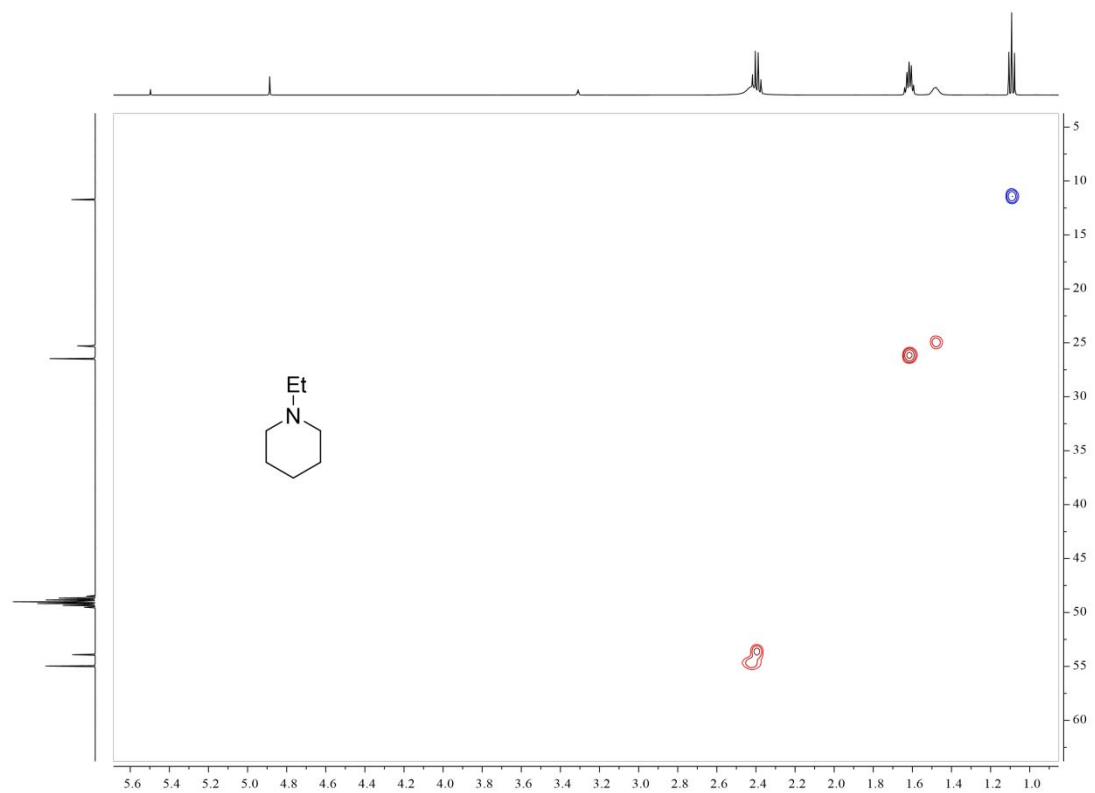

**Figure S7.** HSQC spectrum of *N*-Et piperidine (1) in CD<sub>3</sub>OD

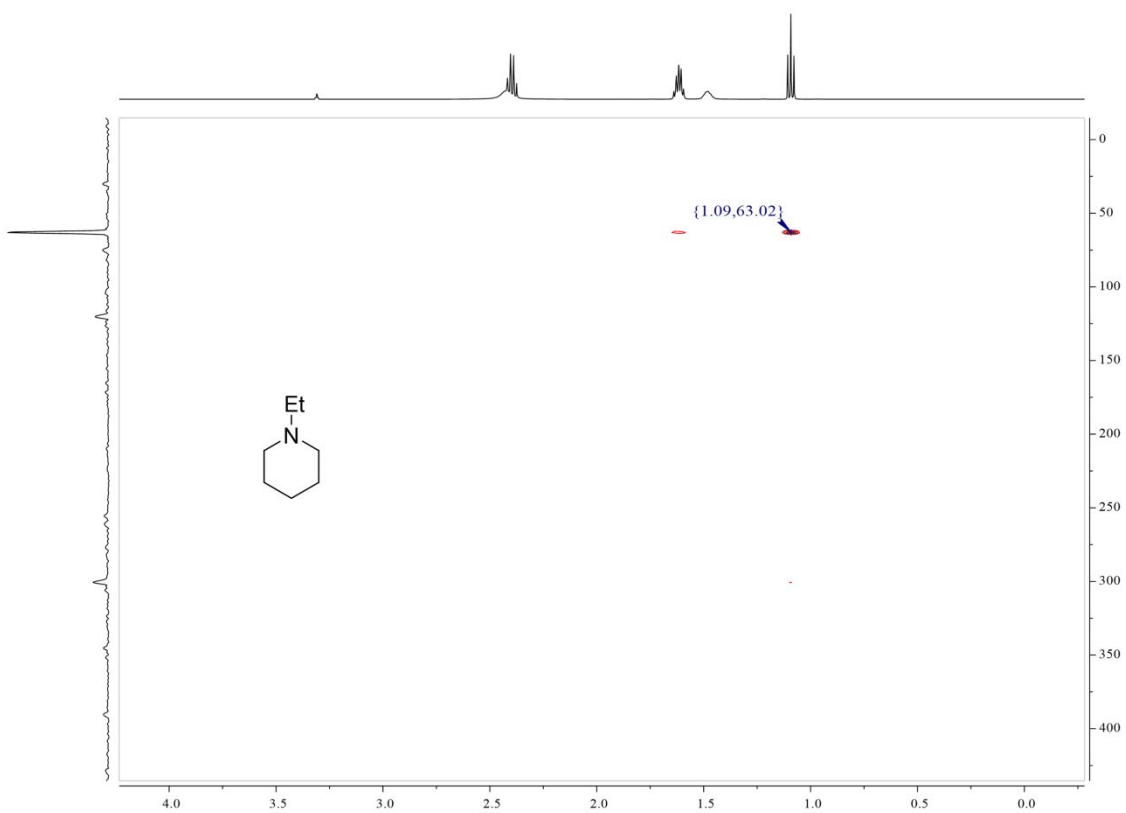

**Figure S8.** <sup>1</sup>H-<sup>15</sup>N HMBC spectrum of *N*-Et piperidine (1) in CD<sub>3</sub>OD

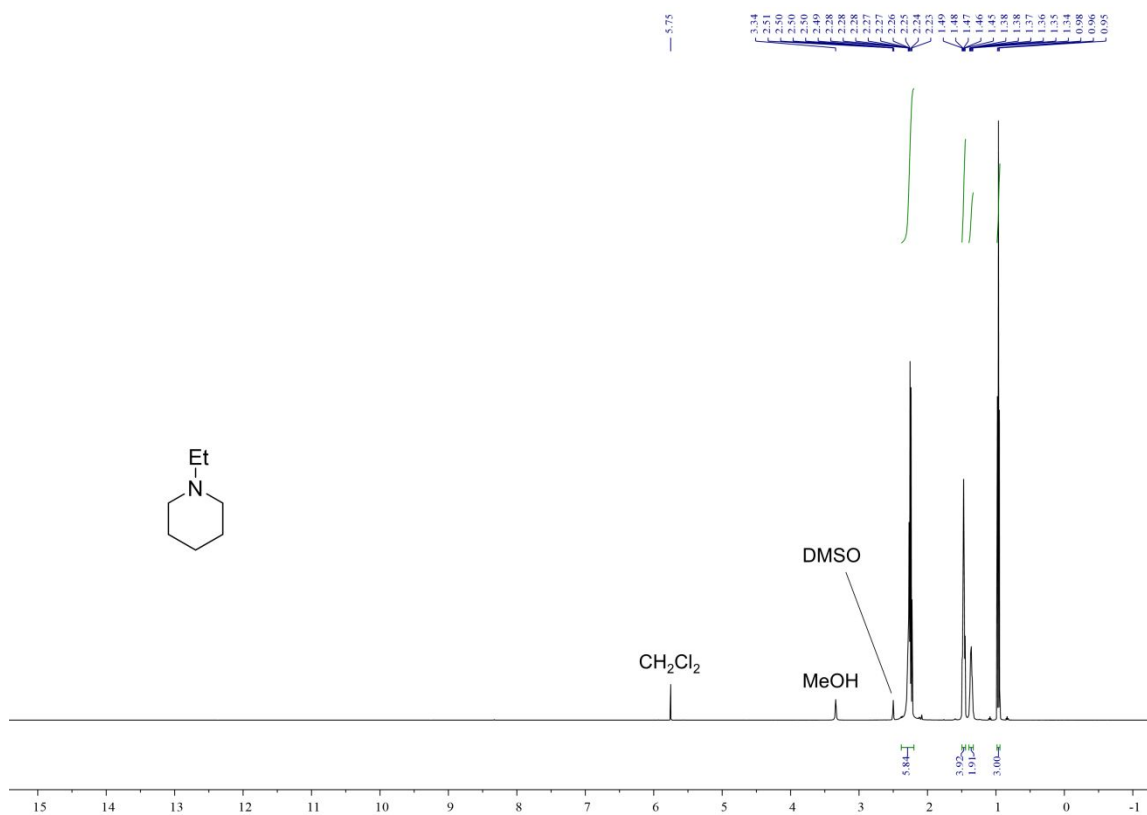

Figure S9. <sup>1</sup>H NMR spectrum of *N*-Et piperidine (1) in *d*<sub>6</sub>-DMSO

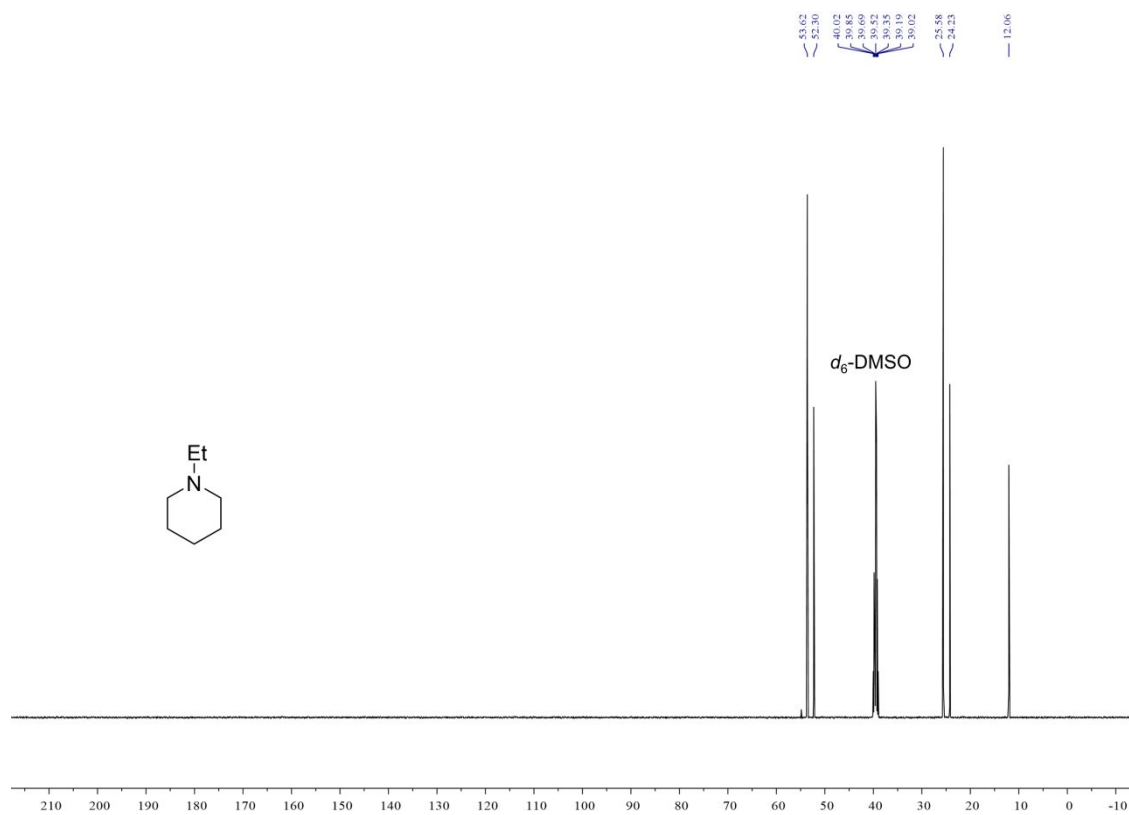

Figure S10. <sup>13</sup>C NMR spectrum of *N*-Et piperidine (1) in *d*<sub>6</sub>-DMSO

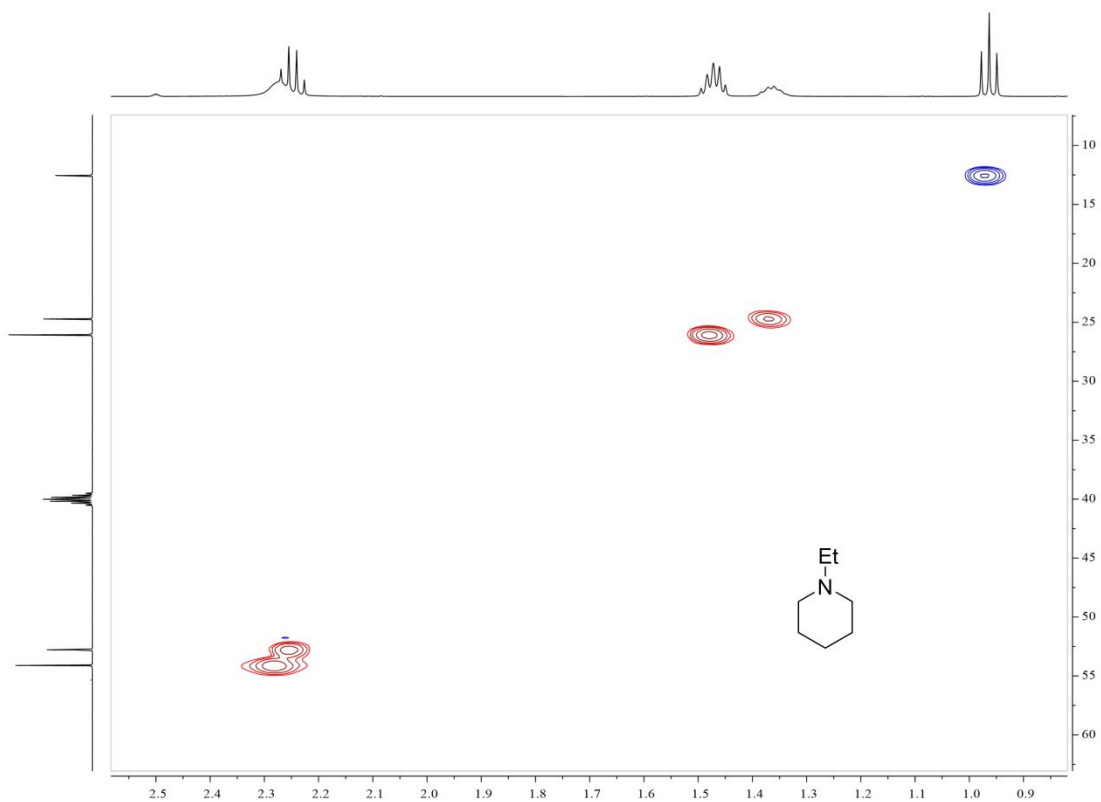

**Figure S11.** HSQC spectrum of *N*-Et piperidine (**1**) in  $d_6$ -DMSO

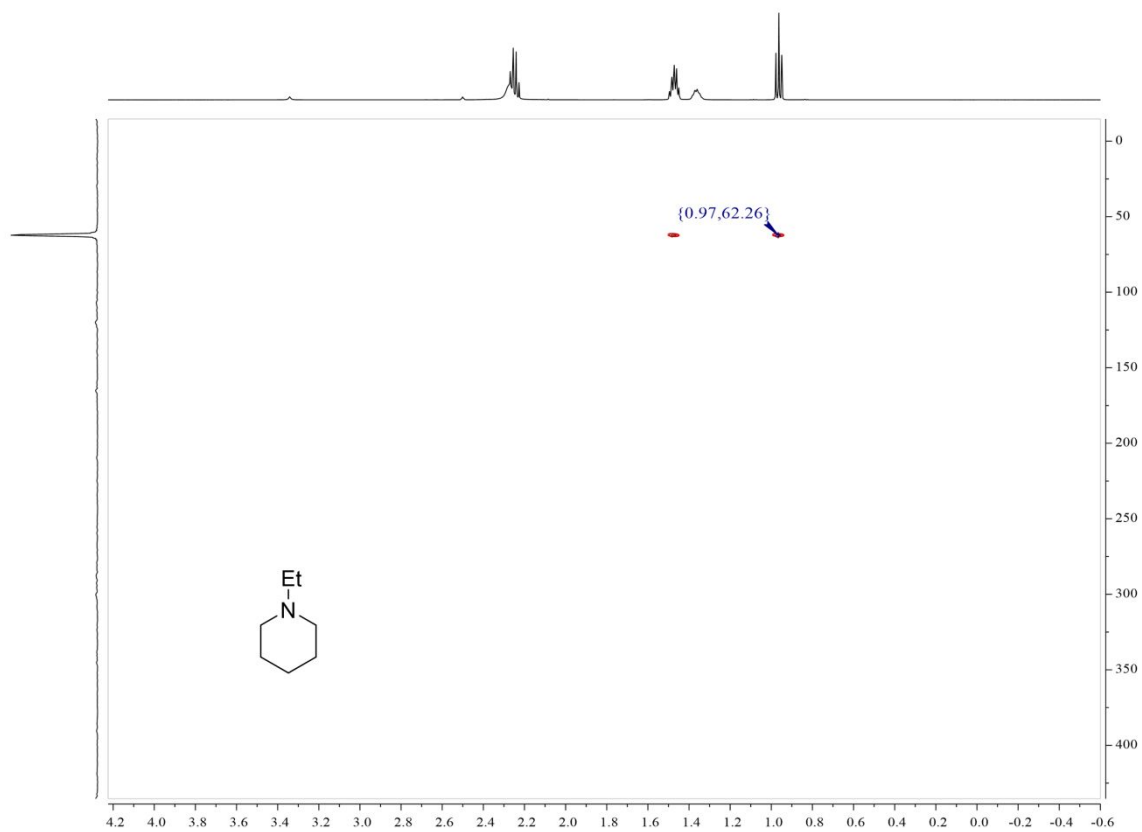

**Figure S12.**  $^1\text{H}$ - $^{15}\text{N}$  HMBC spectrum of *N*-Et piperidine (**1**) in  $d_6$ -DMSO

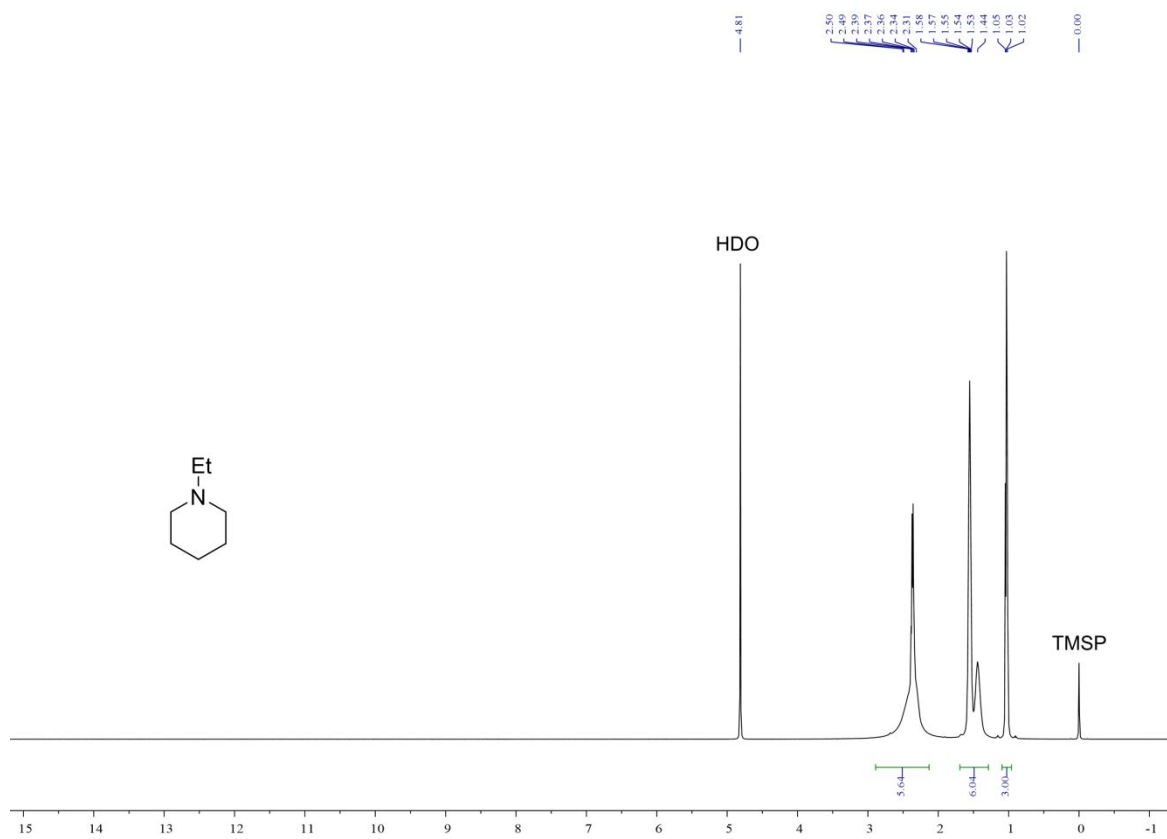

**Figure S13.**  $^1\text{H}$  NMR spectrum of *N*-Et piperidine (**1**) in  $\text{D}_2\text{O}$  (with additional 2 drops of  $d_6$ -DMSO)

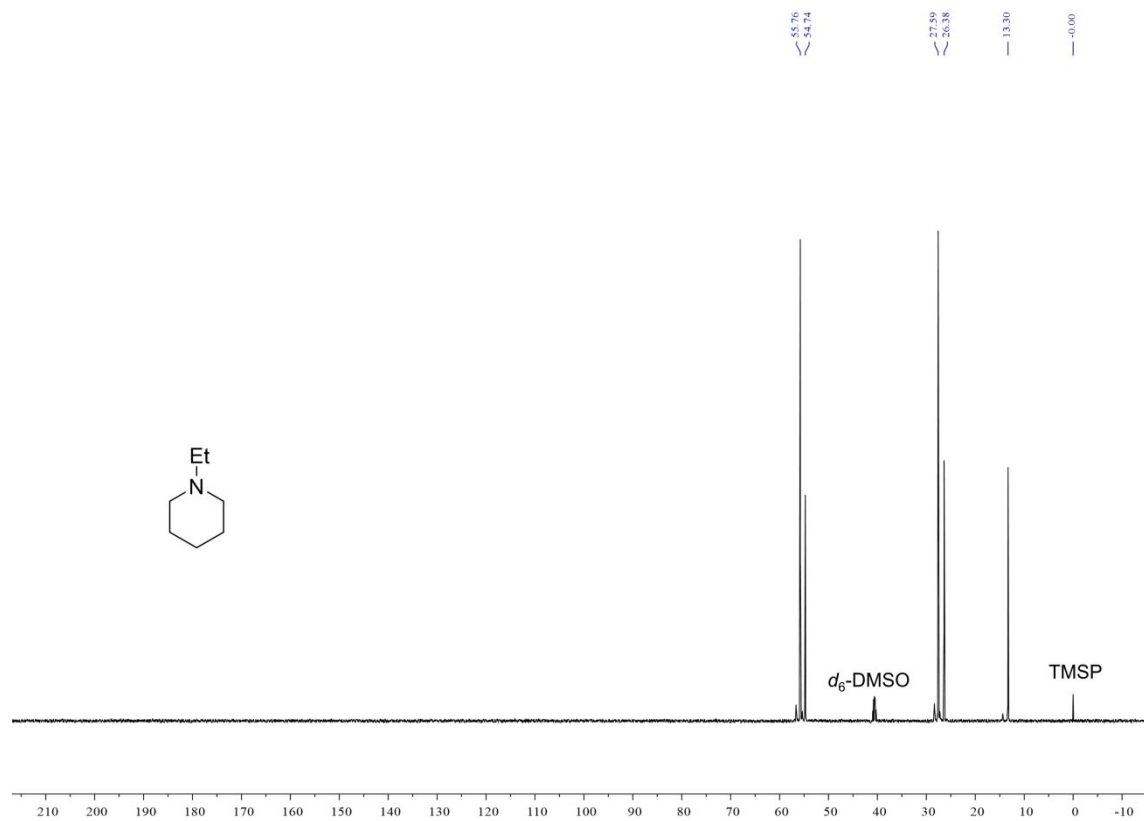

**Figure S14.**  $^{13}\text{C}$  NMR spectrum of *N*-Et piperidine (**1**) in  $\text{D}_2\text{O}$  (with additional 2 drops of  $d_6$ -DMSO)



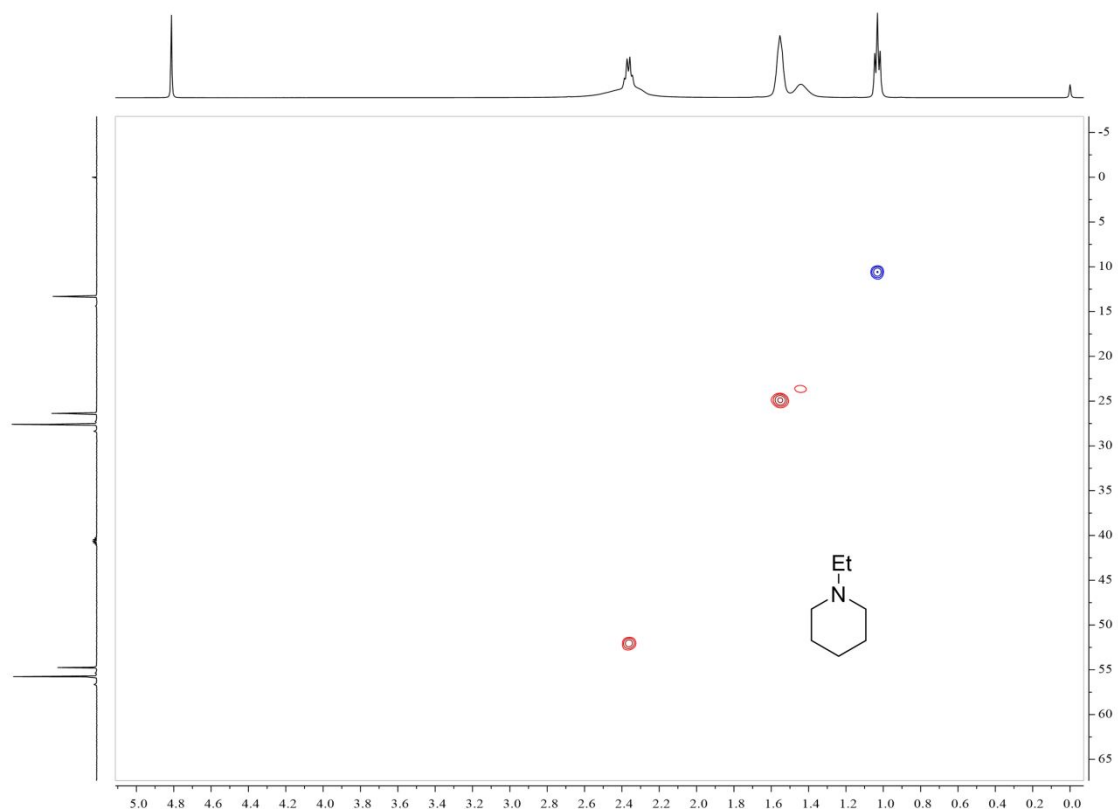

**Figure S15.** HSQC spectrum of *N*-Et piperidine (1) in D<sub>2</sub>O (with additional 2 drops of *d*<sub>6</sub>-DMSO)

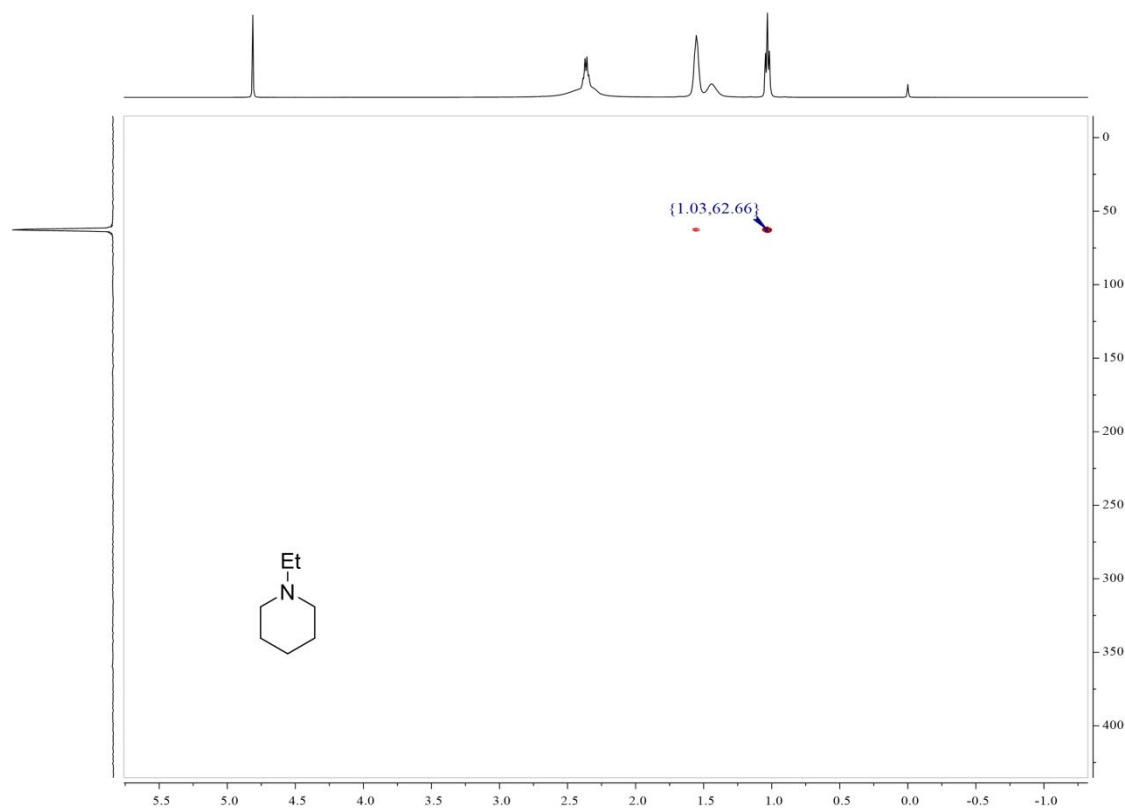

**Figure S16.** <sup>1</sup>H-<sup>15</sup>N HMBC spectrum of *N*-Et piperidine (1) in D<sub>2</sub>O (with additional 2 drops of *d*<sub>6</sub>-DMSO)

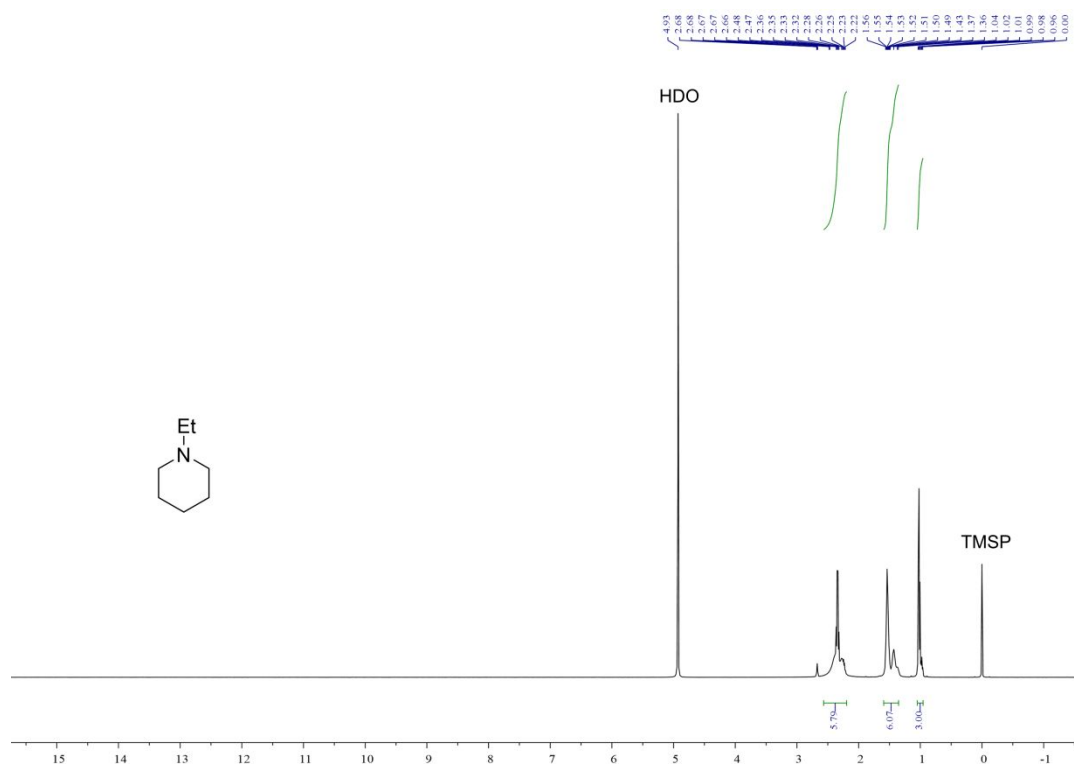

**Figure S17.**  $^1\text{H}$  NMR spectrum of *N*-Et piperidine (**1**) in  $\text{D}_2\text{O}$  (with additional 2 drops of  $d_6$ -DMSO and drops of NaOD solution, 30% in  $\text{D}_2\text{O}$ , w/w, pD ~13)

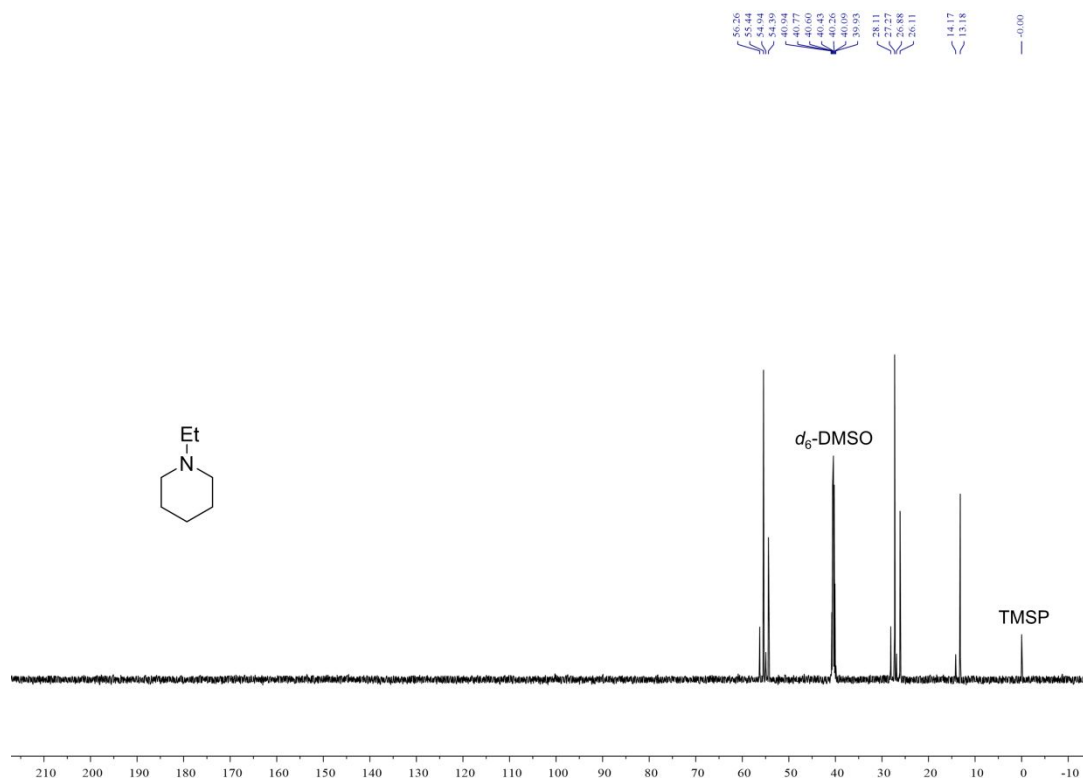

**Figure S18.**  $^{13}\text{C}$  NMR spectrum of *N*-Et piperidine (**1**) in  $\text{D}_2\text{O}$  (with additional 2 drops of  $d_6$ -DMSO and drops of NaOD solution, 30% in  $\text{D}_2\text{O}$ , w/w, pD ~13)

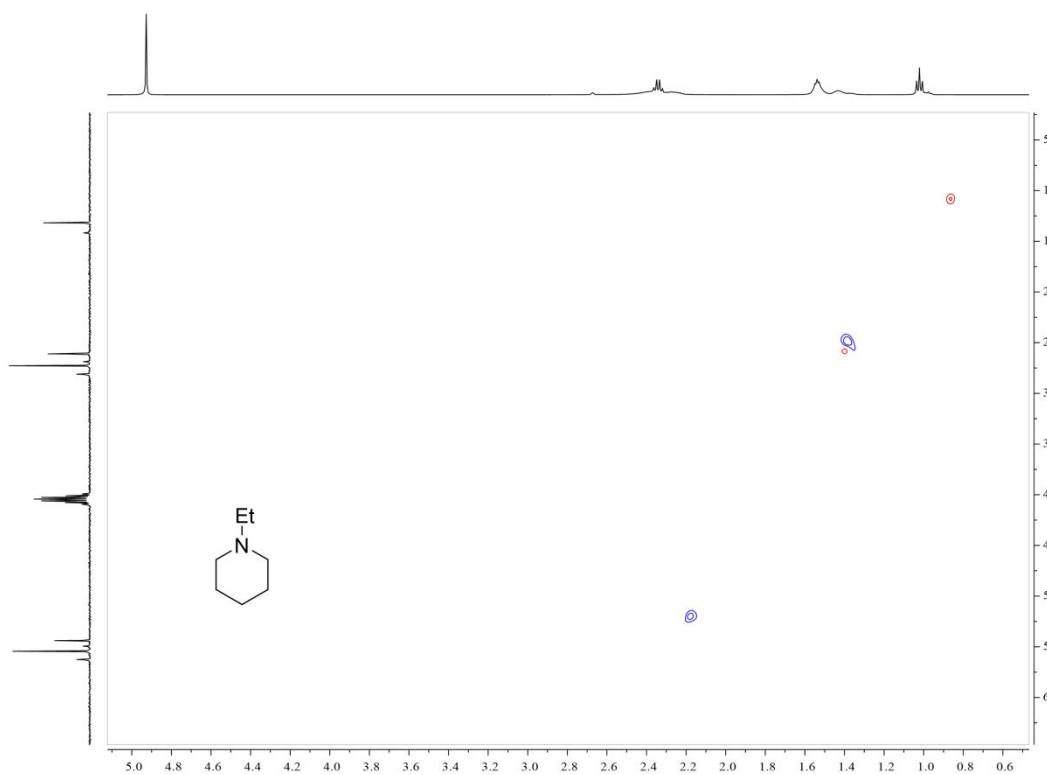

**Figure S19.** HSQC spectrum of *N*-Et piperidine (**1**) in D<sub>2</sub>O (with additional 2 drops of *d*<sub>6</sub>-DMSO and drops of NaOD solution, 30% in D<sub>2</sub>O, w/w, pD ~13)

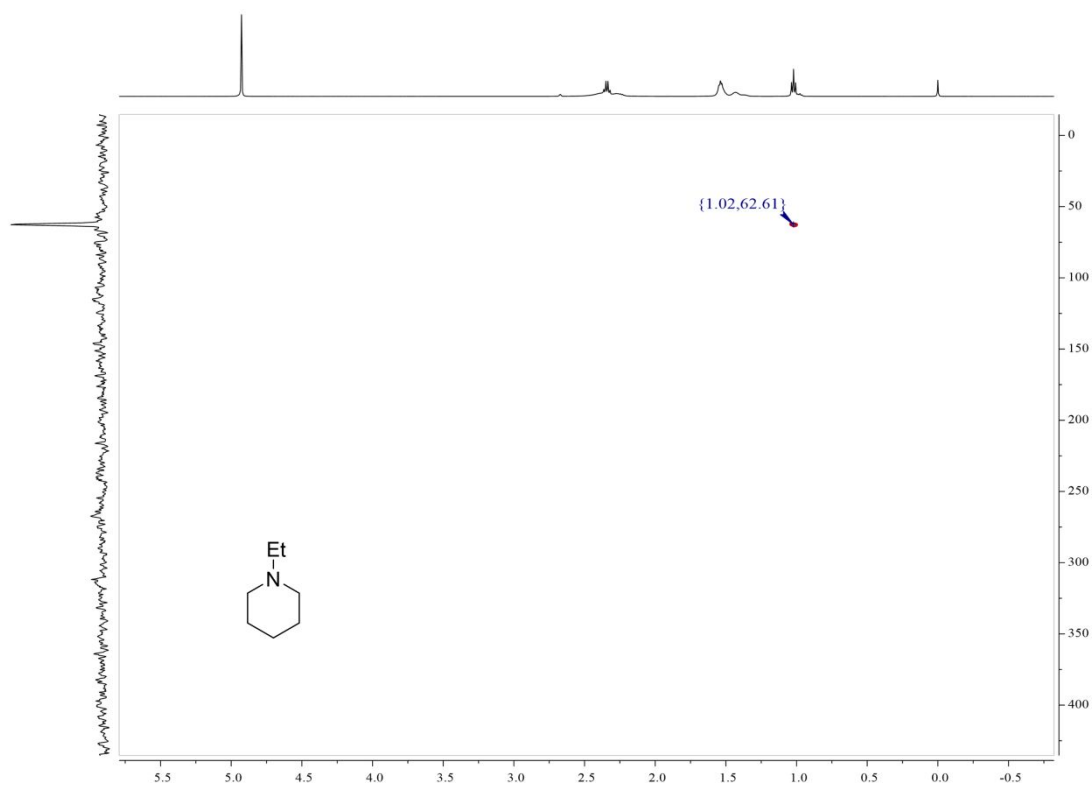

**Figure S20.** <sup>1</sup>H-<sup>15</sup>N HMBC spectrum of *N*-Et piperidine (**1**) in D<sub>2</sub>O (with additional 2 drops of *d*<sub>6</sub>-DMSO and drops of NaOD solution, 30% in D<sub>2</sub>O, w/w, pD ~13)

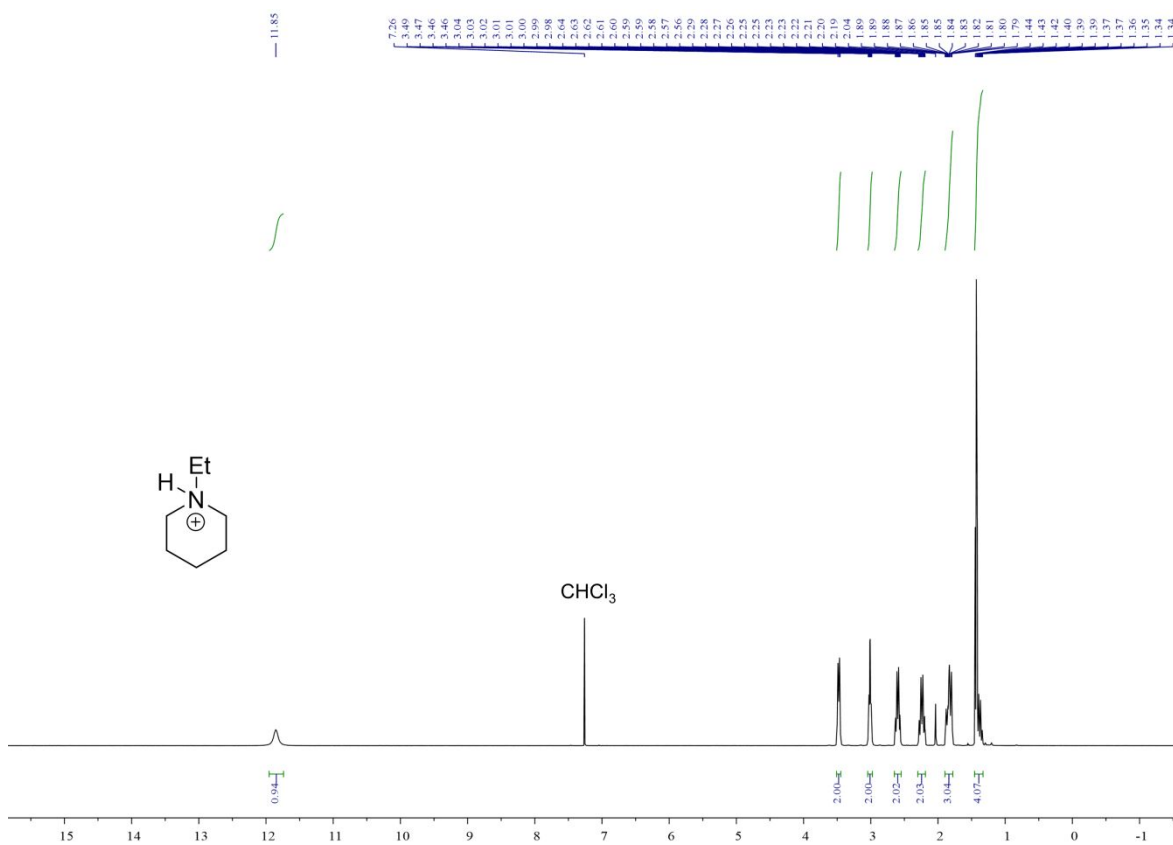

Figure S21.  $^1\text{H}$  NMR spectrum of *N*-Et piperidine HCl salt (**1'**) in  $\text{CDCl}_3$

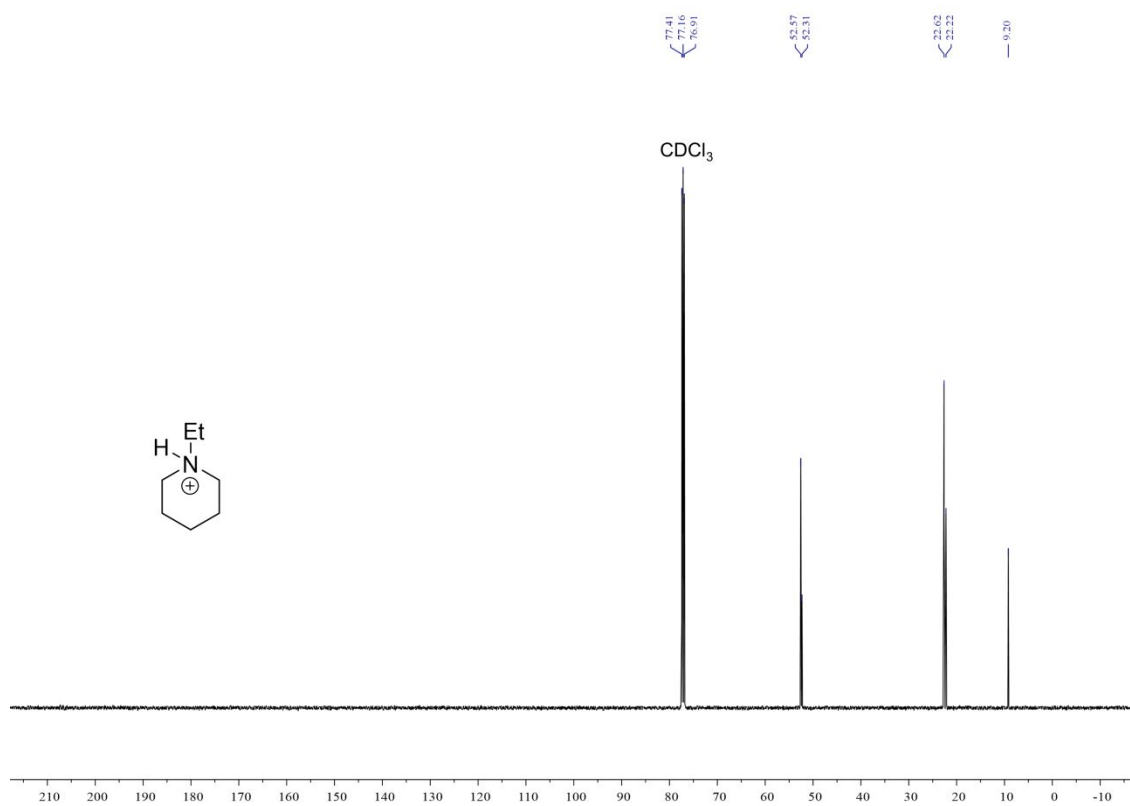

Figure S22.  $^{13}\text{C}$  NMR spectrum of *N*-Et piperidine HCl salt (**1'**) in  $\text{CDCl}_3$

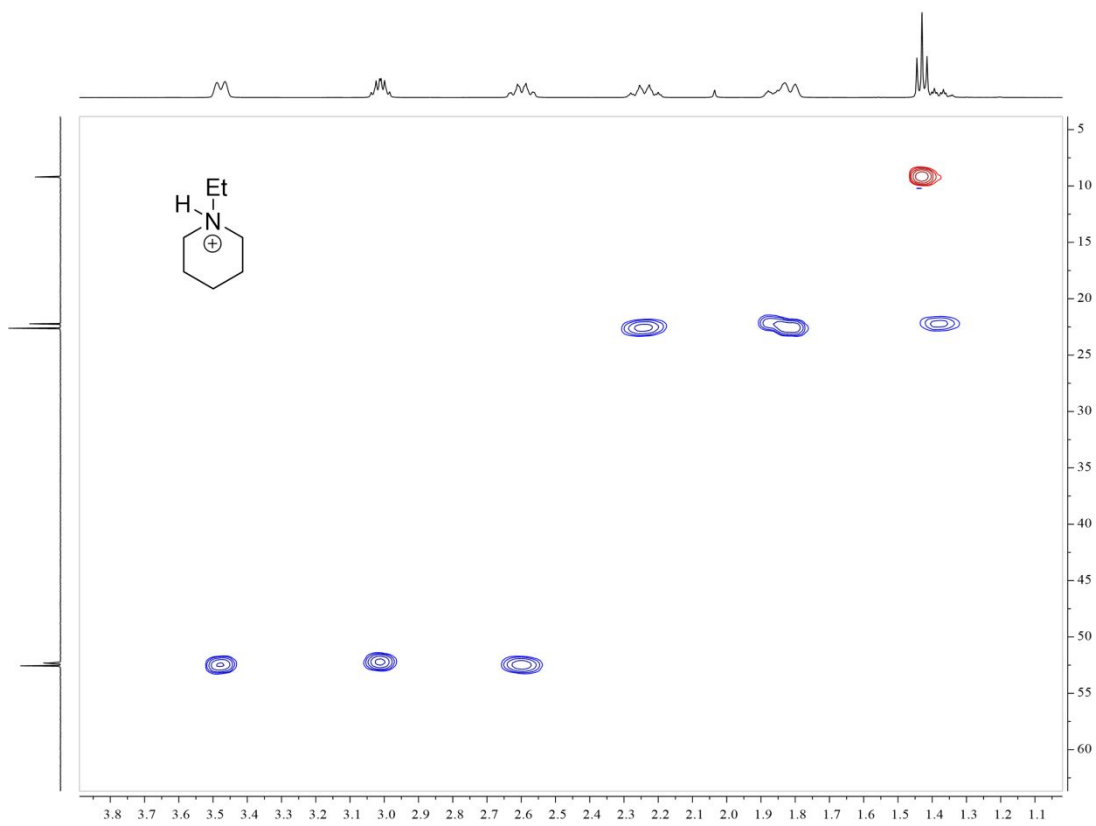

**Figure S23.** HSQC spectrum of *N*-Et piperidine HCl salt (**1'**) in CDCl<sub>3</sub>

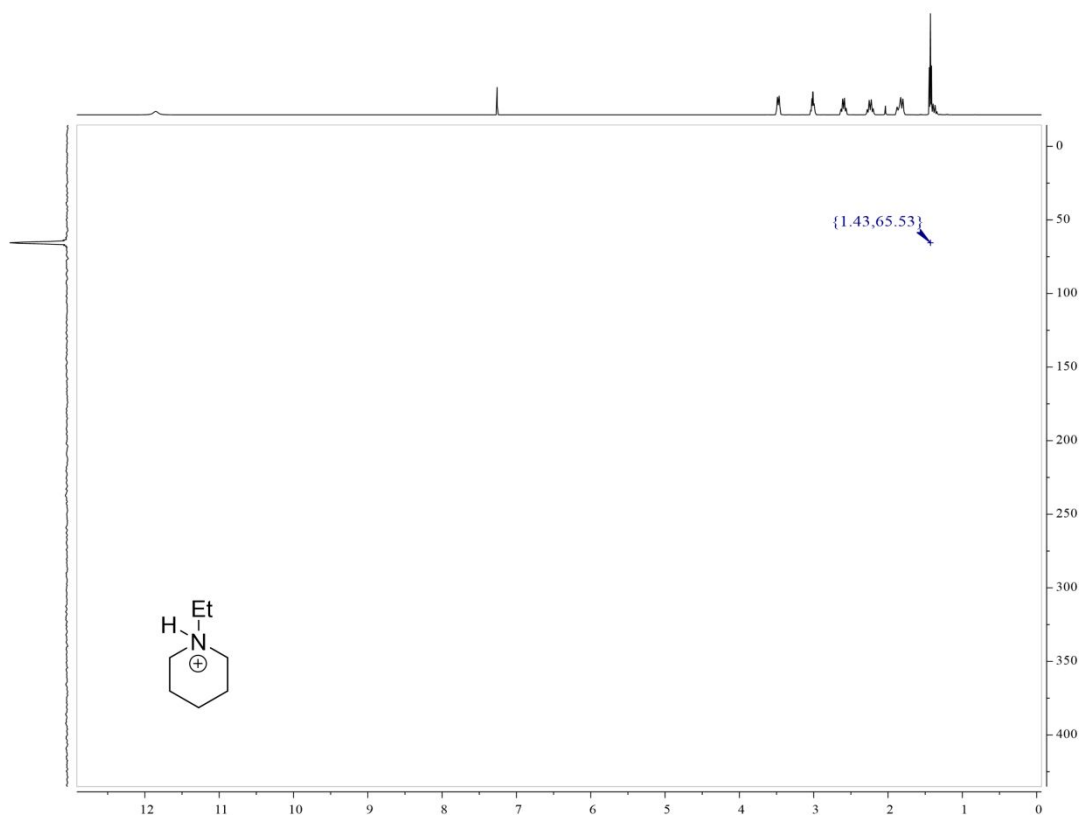

**Figure S24.** <sup>1</sup>H-<sup>15</sup>N HMBC spectrum of *N*-Et piperidine HCl salt (**1'**) in CDCl<sub>3</sub>

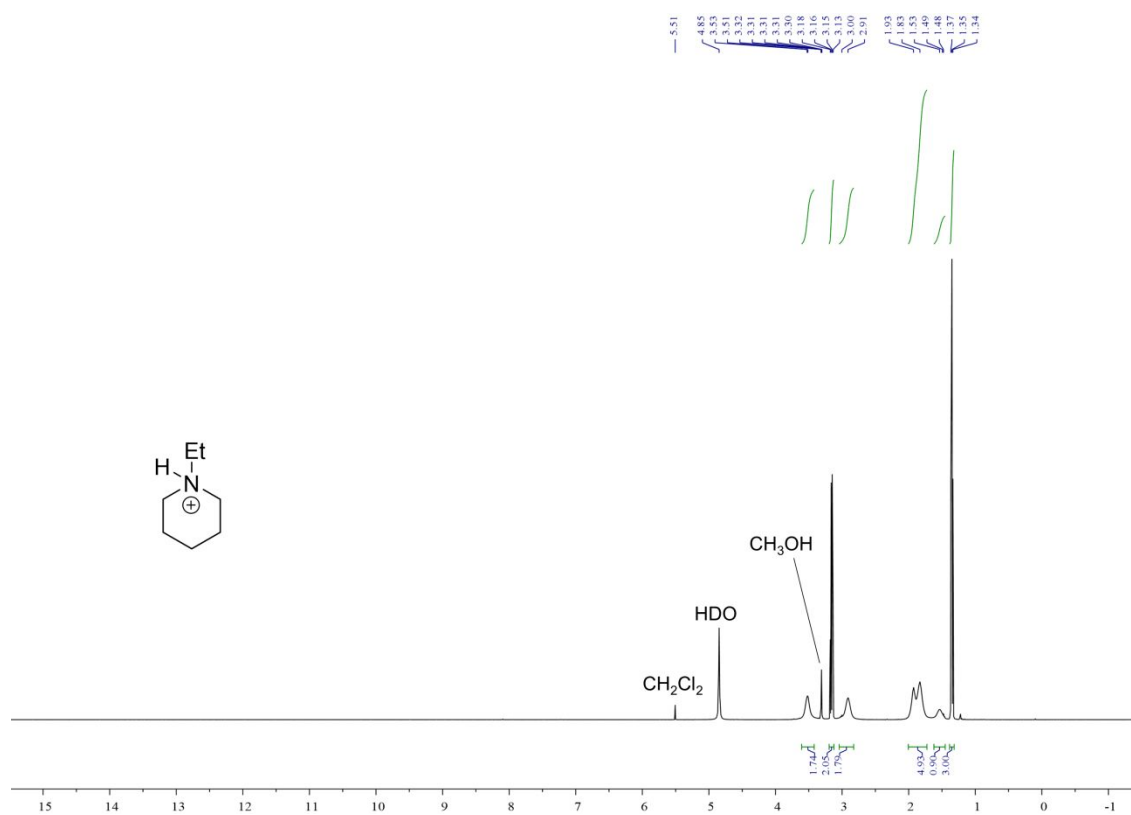

Figure S25.  $^1\text{H}$  NMR spectrum of *N*-Et piperidine HCl salt (**1'**) in  $\text{CD}_3\text{OD}$

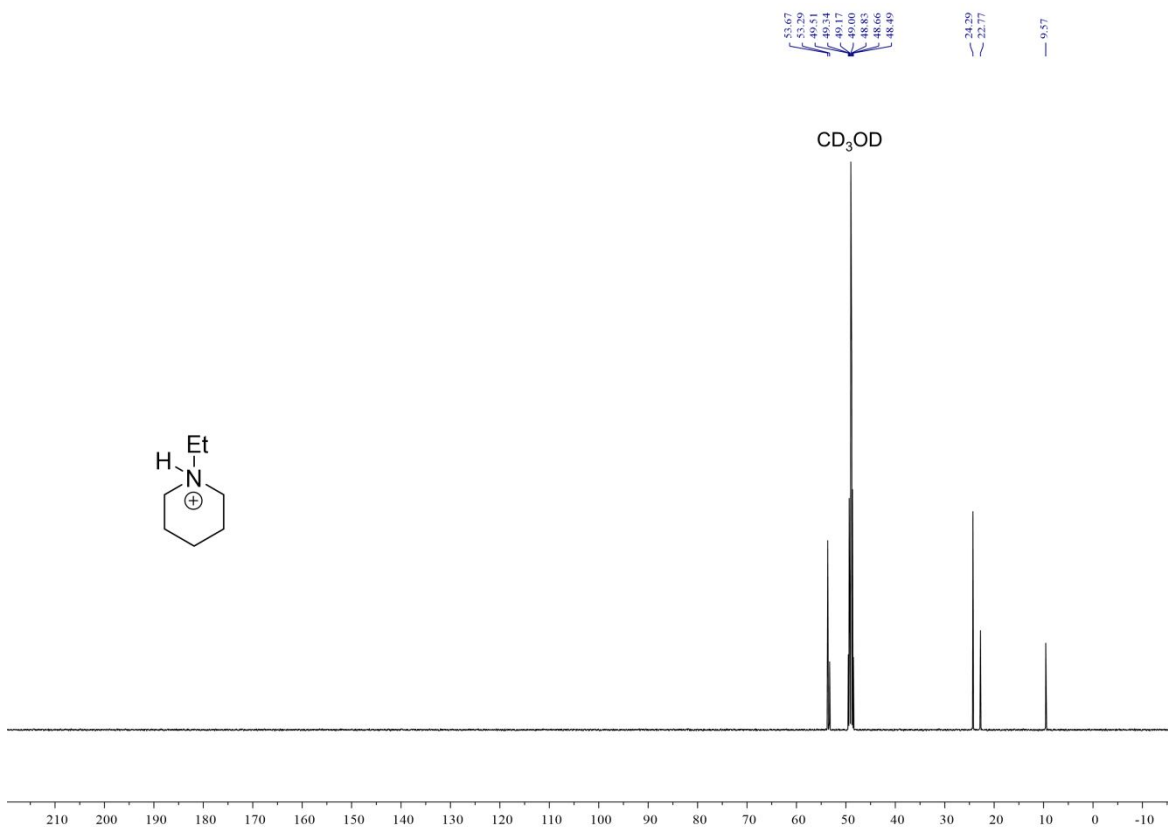

Figure S26.  $^{13}\text{C}$  NMR spectrum of *N*-Et piperidine HCl salt (**1'**) in  $\text{CD}_3\text{OD}$

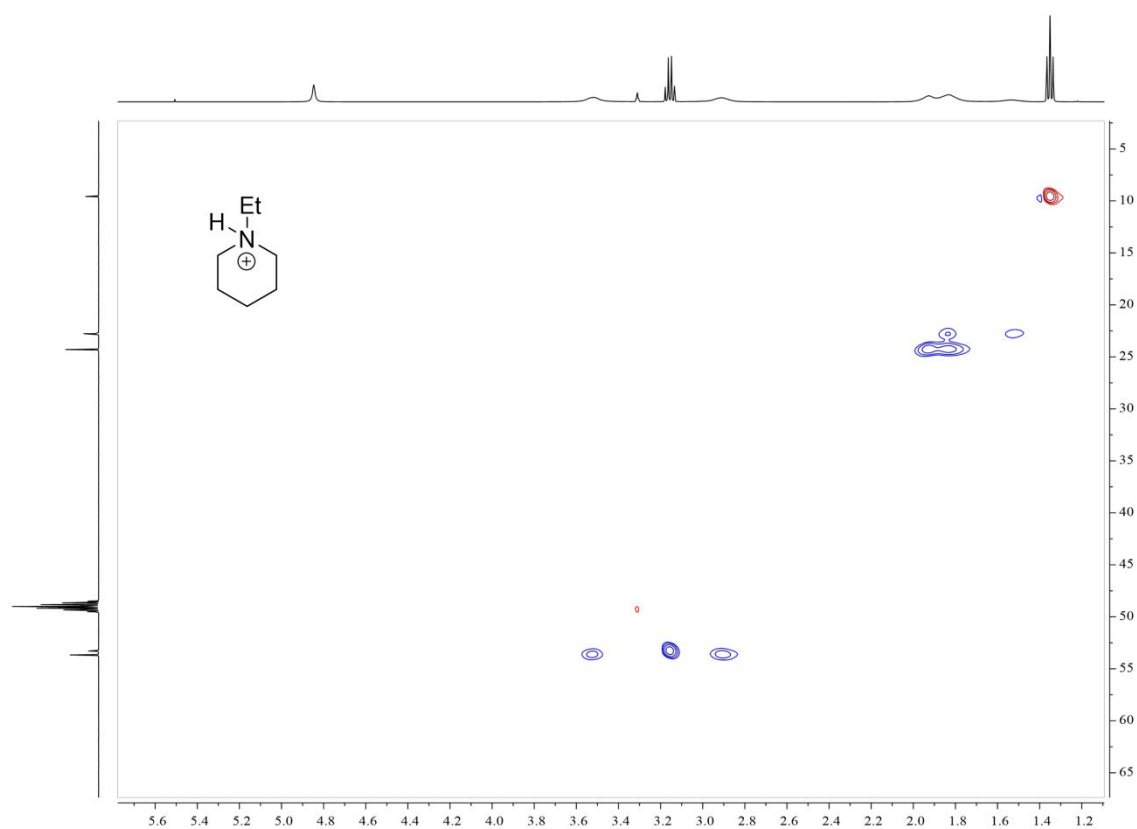

**Figure S27.** HSQC spectrum of *N*-Et piperidine HCl salt (**1'**) in CD<sub>3</sub>OD

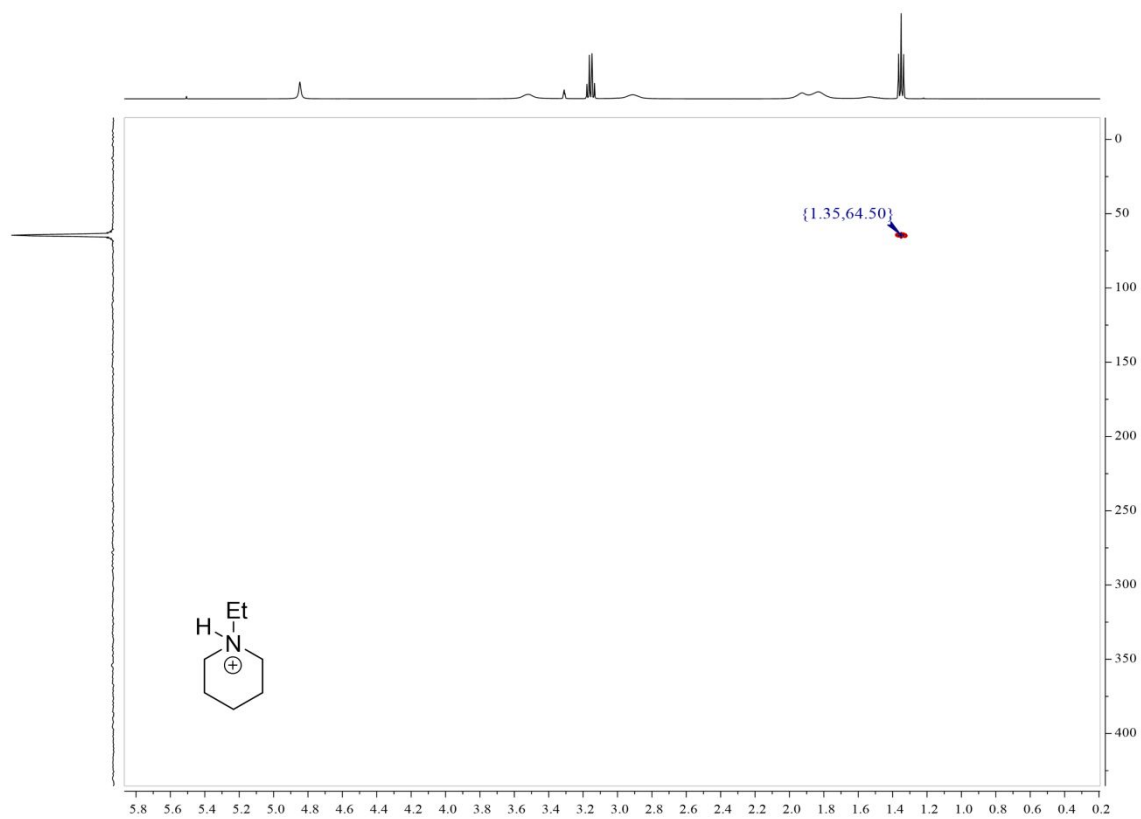

**Figure S28.** <sup>1</sup>H-<sup>15</sup>N HMBC spectrum of *N*-Et piperidine HCl salt (**1'**) in CD<sub>3</sub>OD

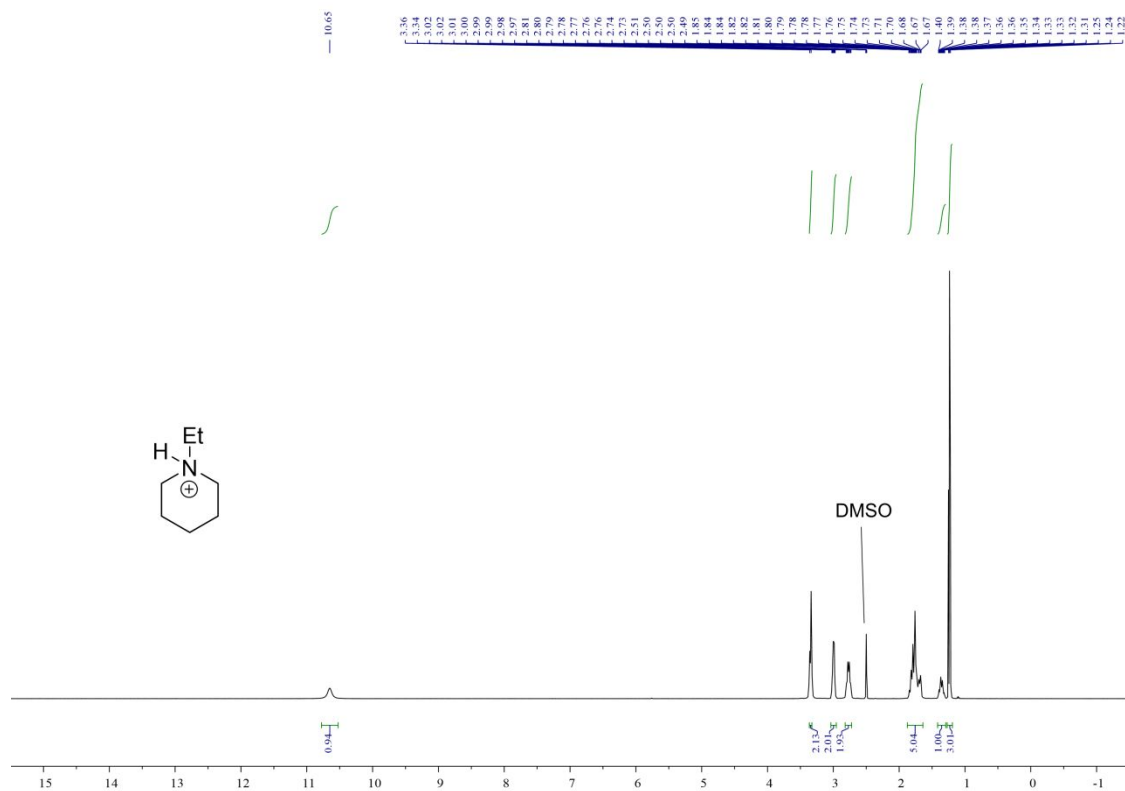

**Figure S29.**  $^1\text{H}$  NMR spectrum of *N*-Et piperidine HCl salt (**1'**) in  $d_6$ -DMSO

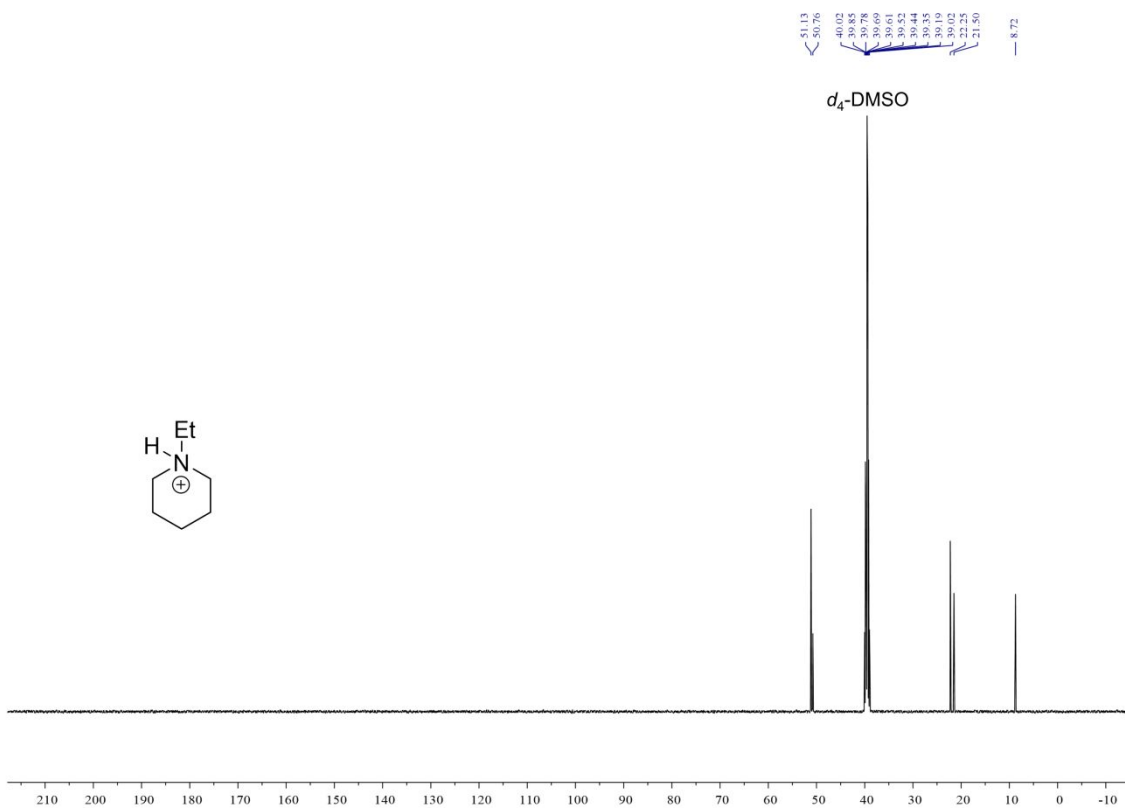

**Figure S30.**  $^{13}\text{C}$  NMR spectrum of *N*-Et piperidine HCl salt (**1'**) in  $d_6$ -DMSO



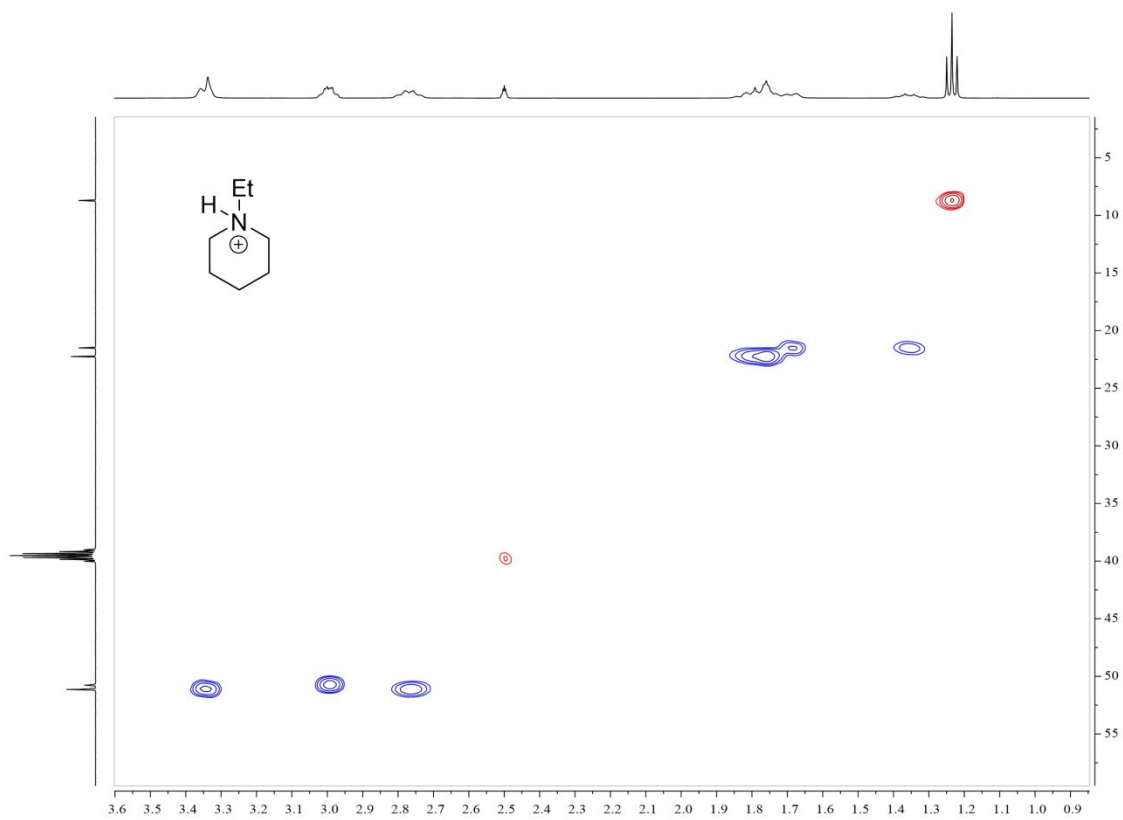

**Figure S31.** HSQC spectrum of *N*-Et piperidine HCl salt (**1'**) in  $d_6$ -DMSO

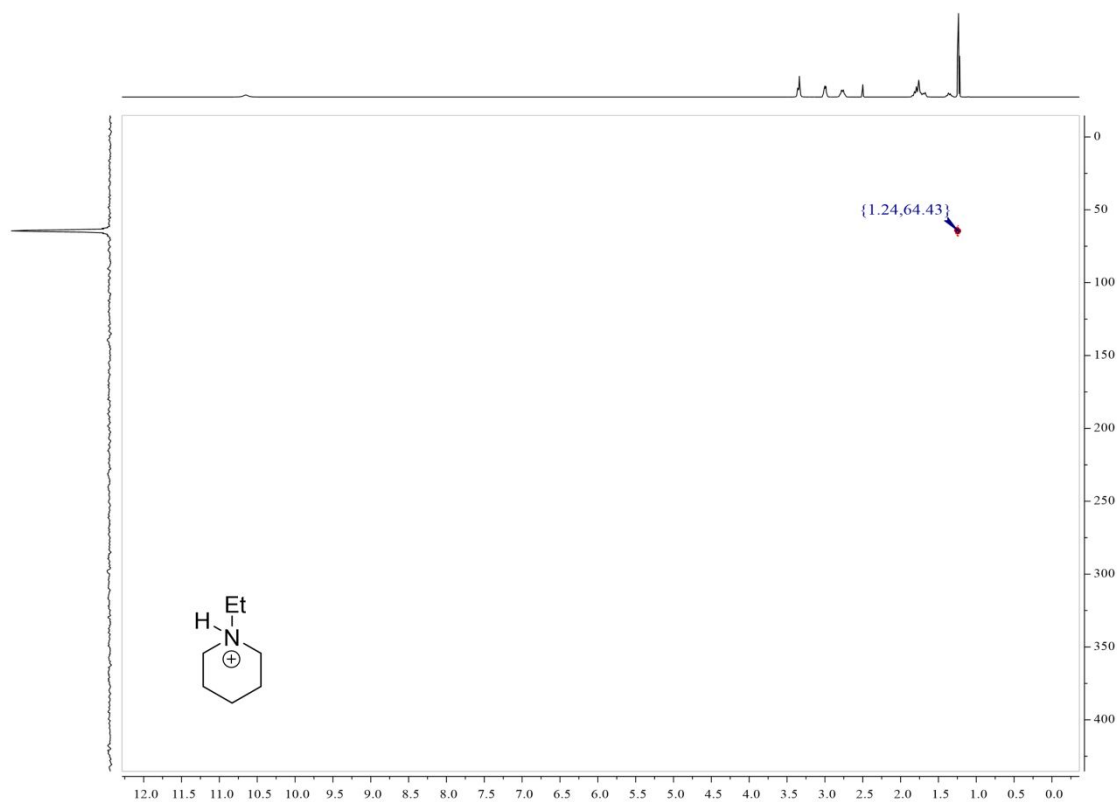

**Figure S32.**  $^1\text{H}$ - $^{15}\text{N}$  HMBC spectrum of *N*-Et piperidine HCl salt (**1'**) in  $d_6$ -DMSO

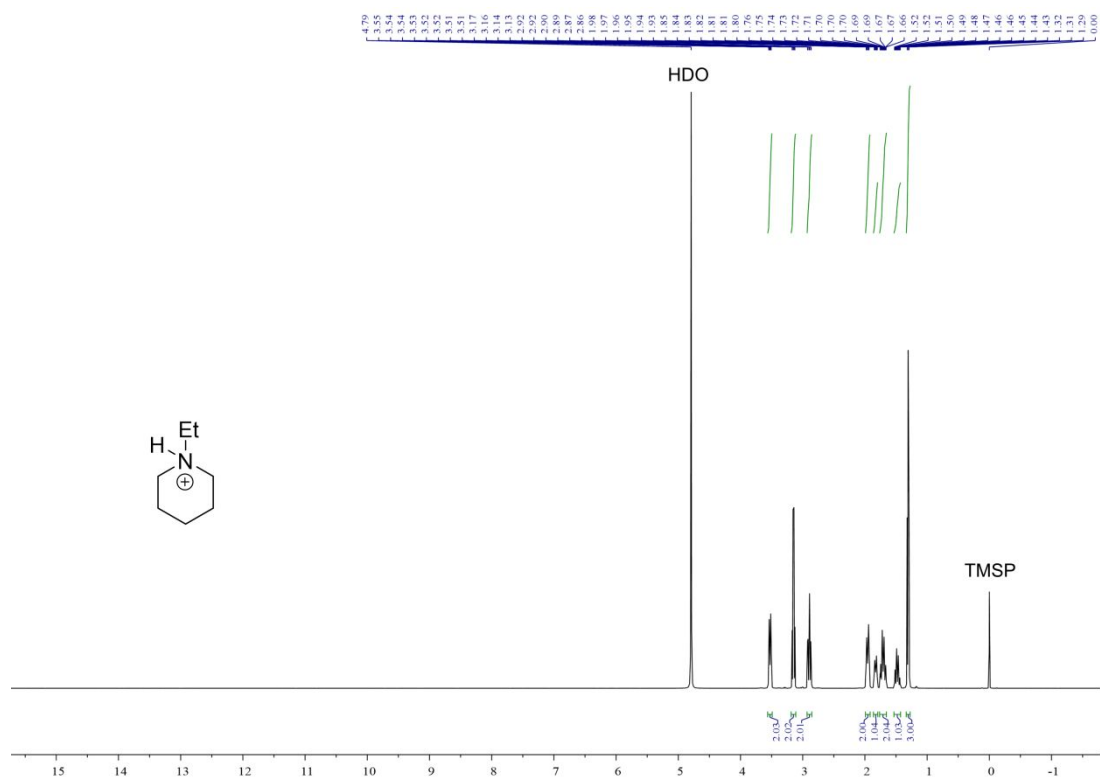

Figure S33.  $^1\text{H}$  NMR spectrum of *N*-Et piperidine HCl salt (**1'**) in  $\text{D}_2\text{O}$

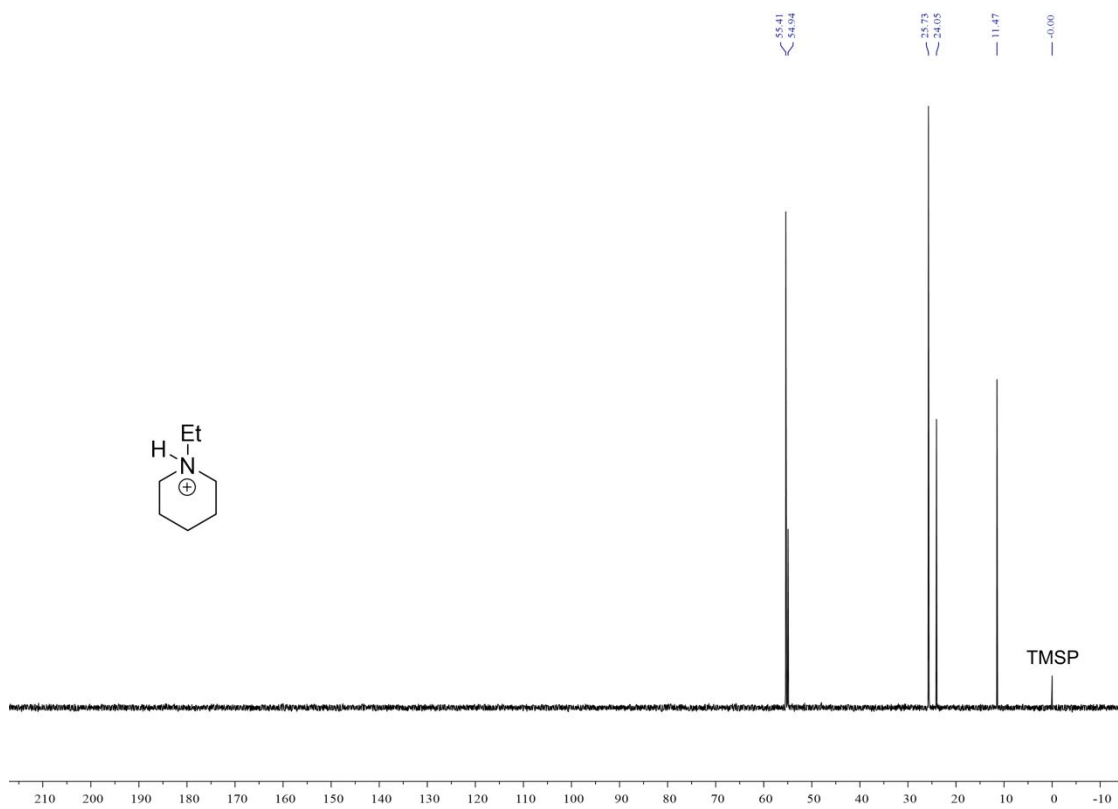

Figure S34.  $^{13}\text{C}$  NMR spectrum of *N*-Et piperidine HCl salt (**1'**) in  $\text{D}_2\text{O}$

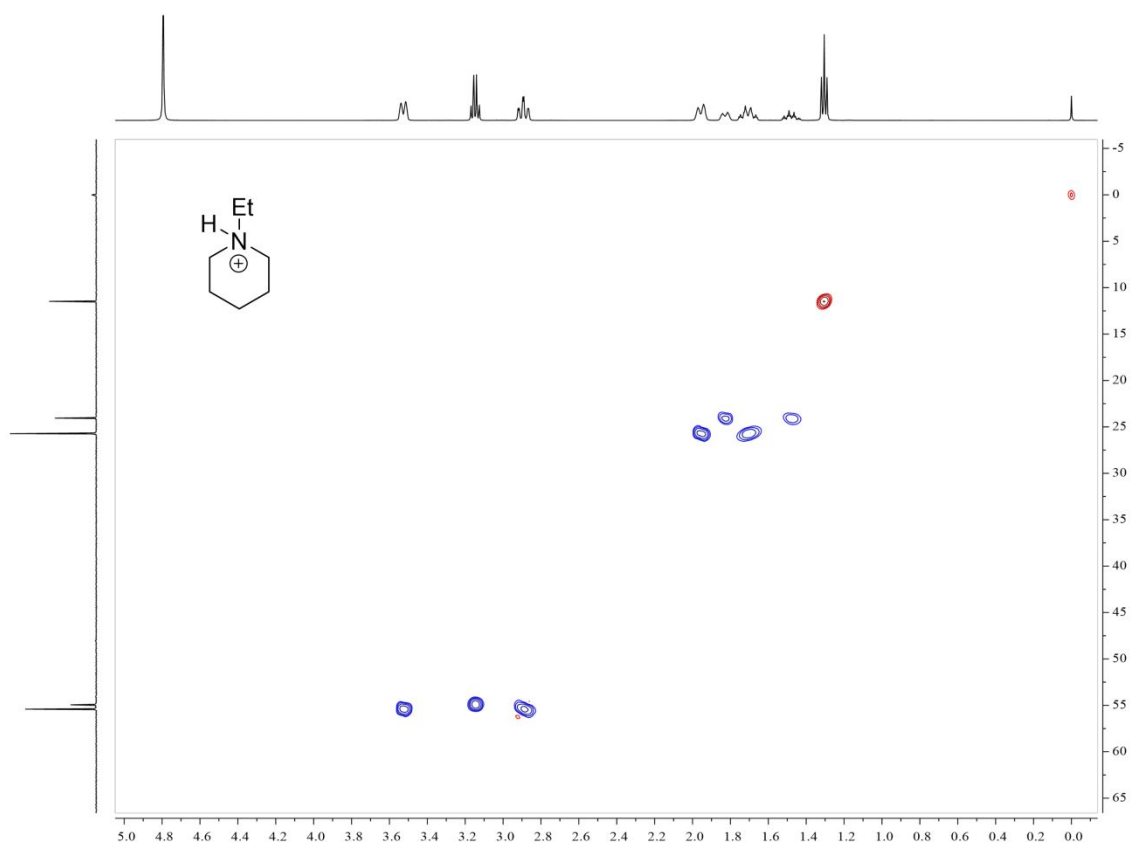

**Figure S35.** HSQC spectrum of *N*-Et piperidine HCl salt (**1'**) in D<sub>2</sub>O

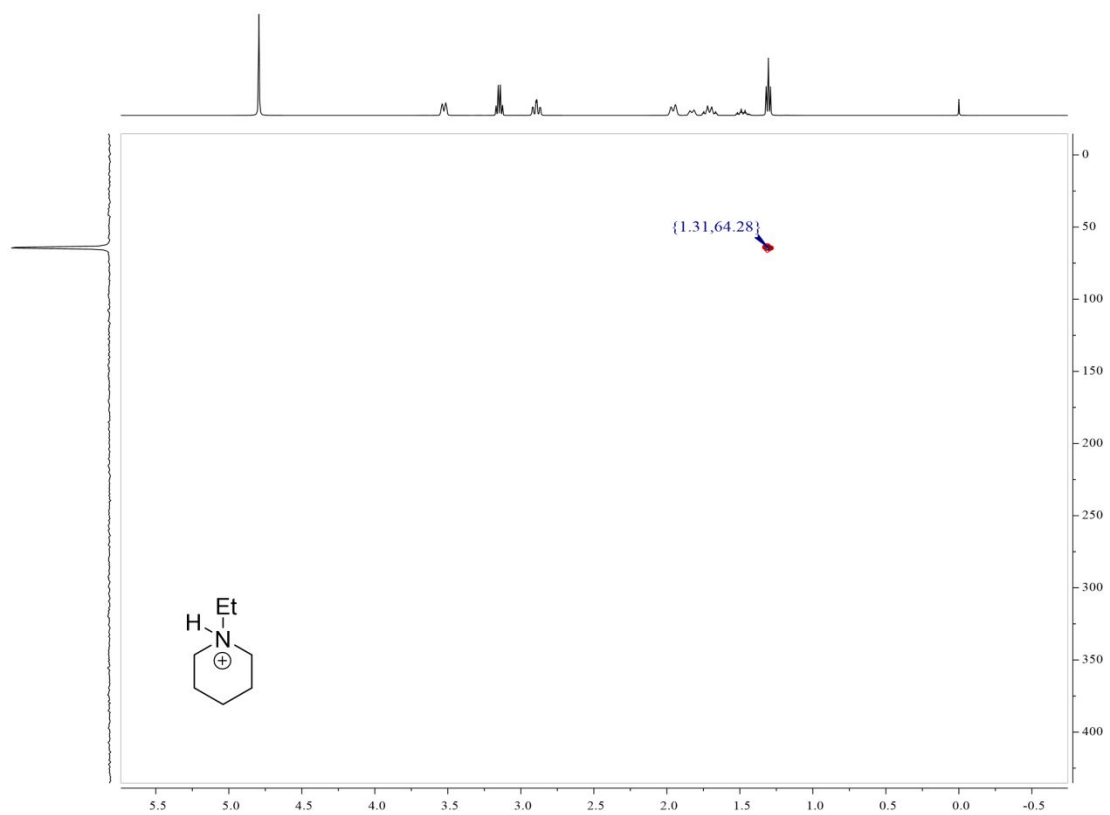

**Figure S36.** <sup>1</sup>H-<sup>15</sup>N HMBC spectrum of *N*-Et piperidine HCl salt (**1'**) in D<sub>2</sub>O

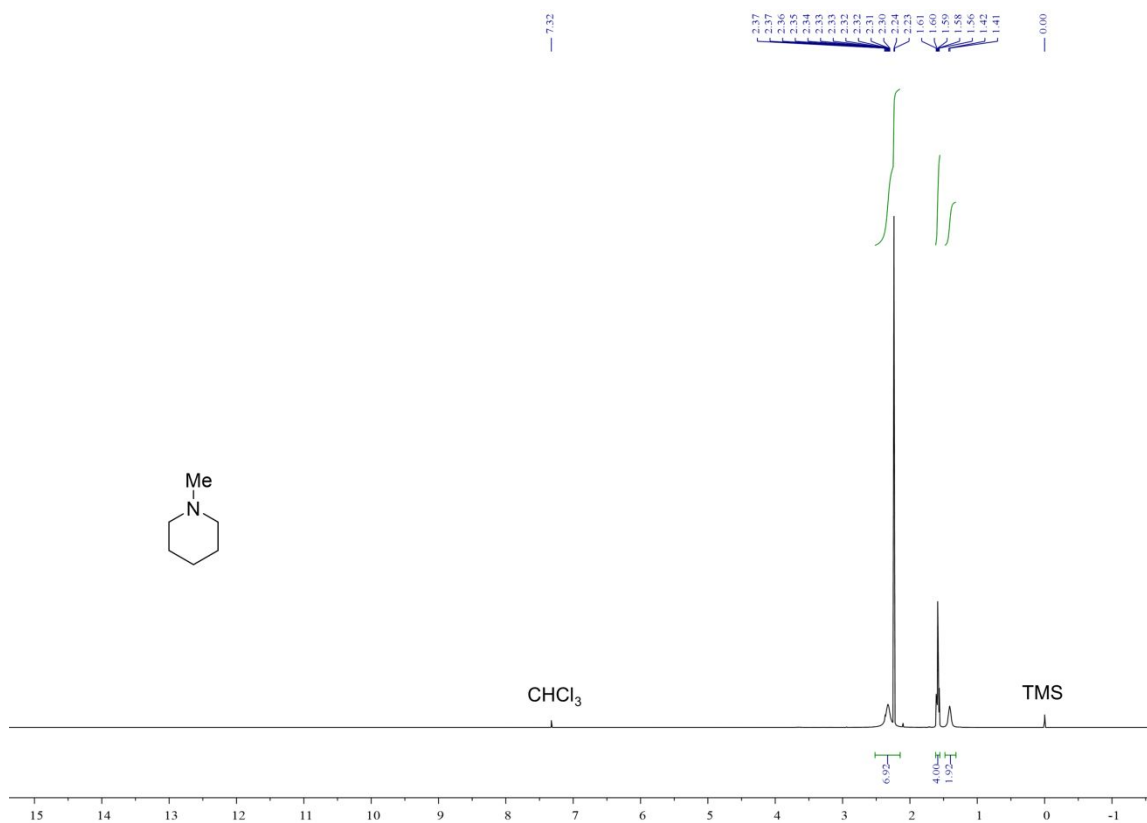

Figure S37.  $^1\text{H}$  NMR spectrum of *N*-Me piperidine (**2**) in  $\text{CDCl}_3$

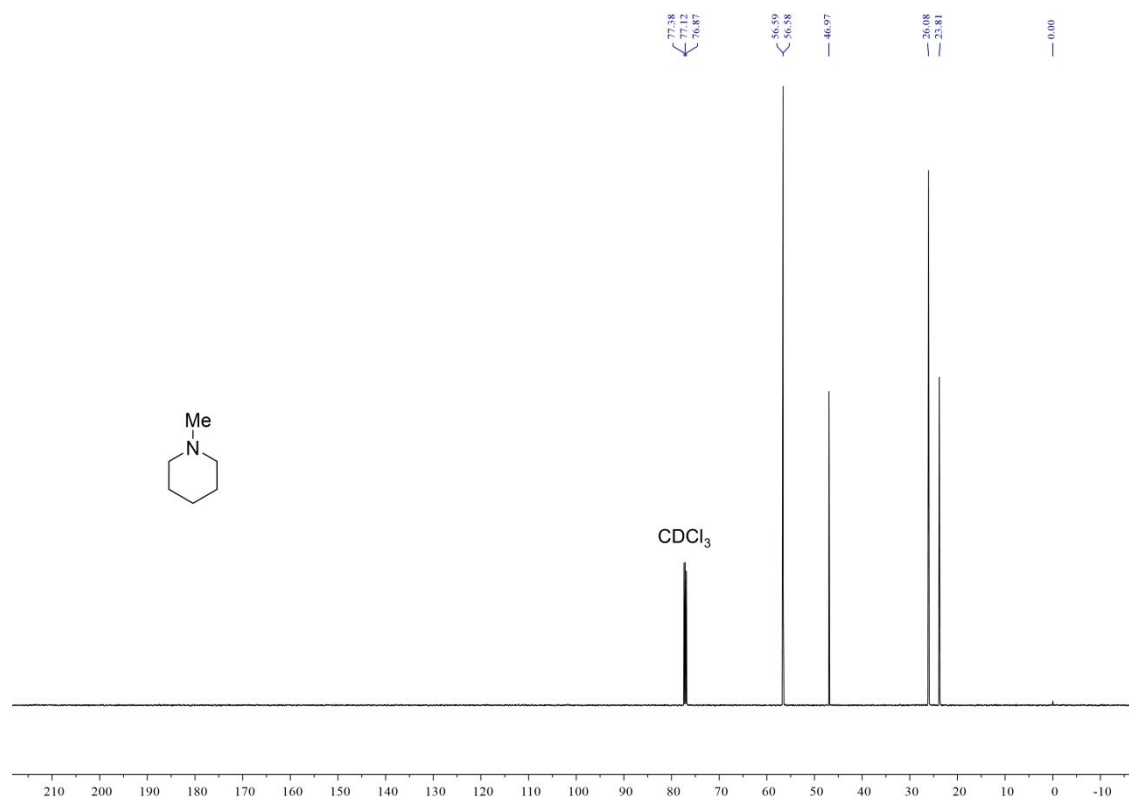

Figure S38.  $^{13}\text{C}$  NMR spectrum of *N*-Me piperidine (**2**) in  $\text{CDCl}_3$

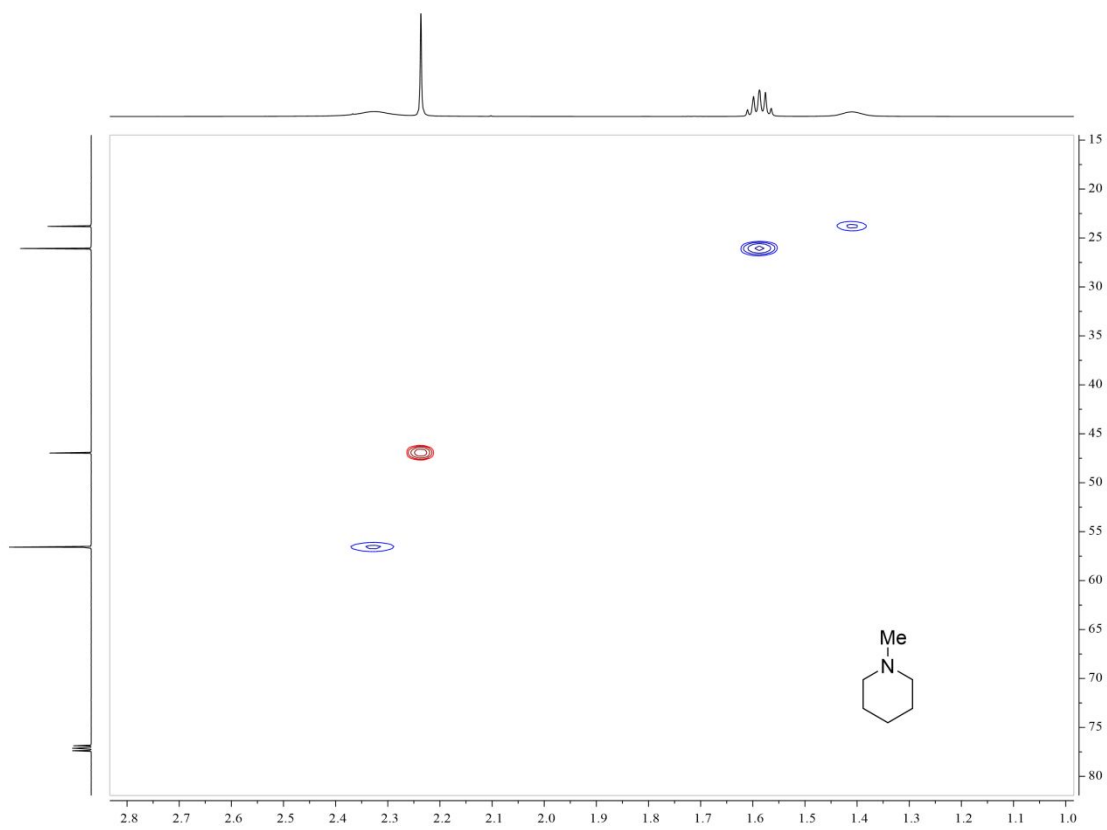

**Figure S39.** HSQC spectrum of *N*-Me piperidine (**2**) in CDCl<sub>3</sub>

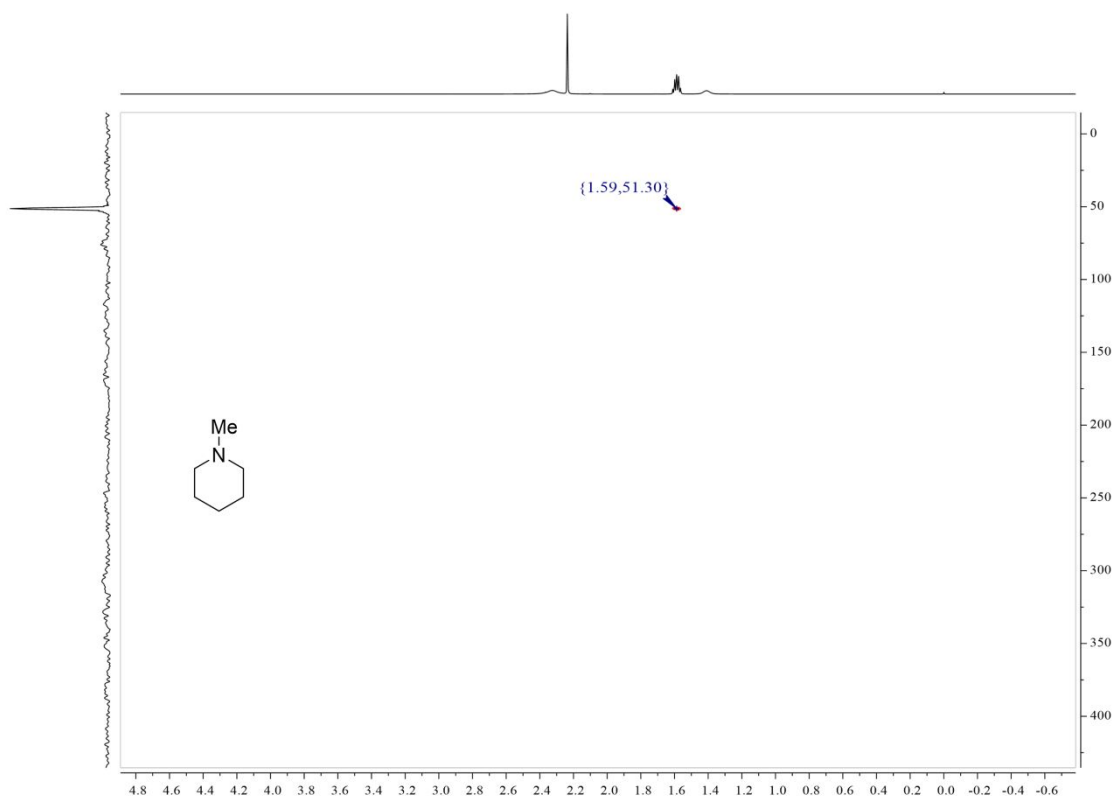

**Figure S40.** <sup>1</sup>H-<sup>15</sup>N HMBC spectrum of *N*-Me piperidine (**2**) in CDCl<sub>3</sub>

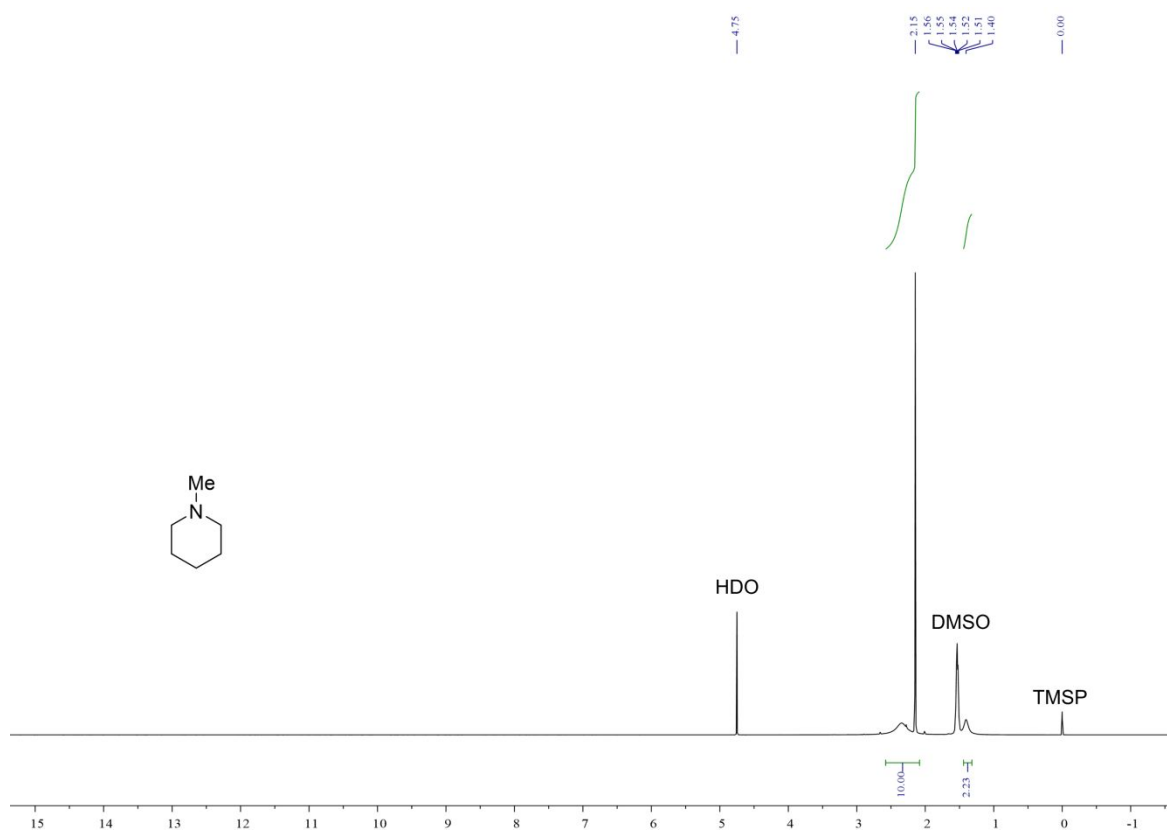

**Figure S41.** <sup>1</sup>H NMR spectrum of *N*-Me piperidine (**2**) in D<sub>2</sub>O (with additional 2 drops of *d*<sub>6</sub>-DMSO)

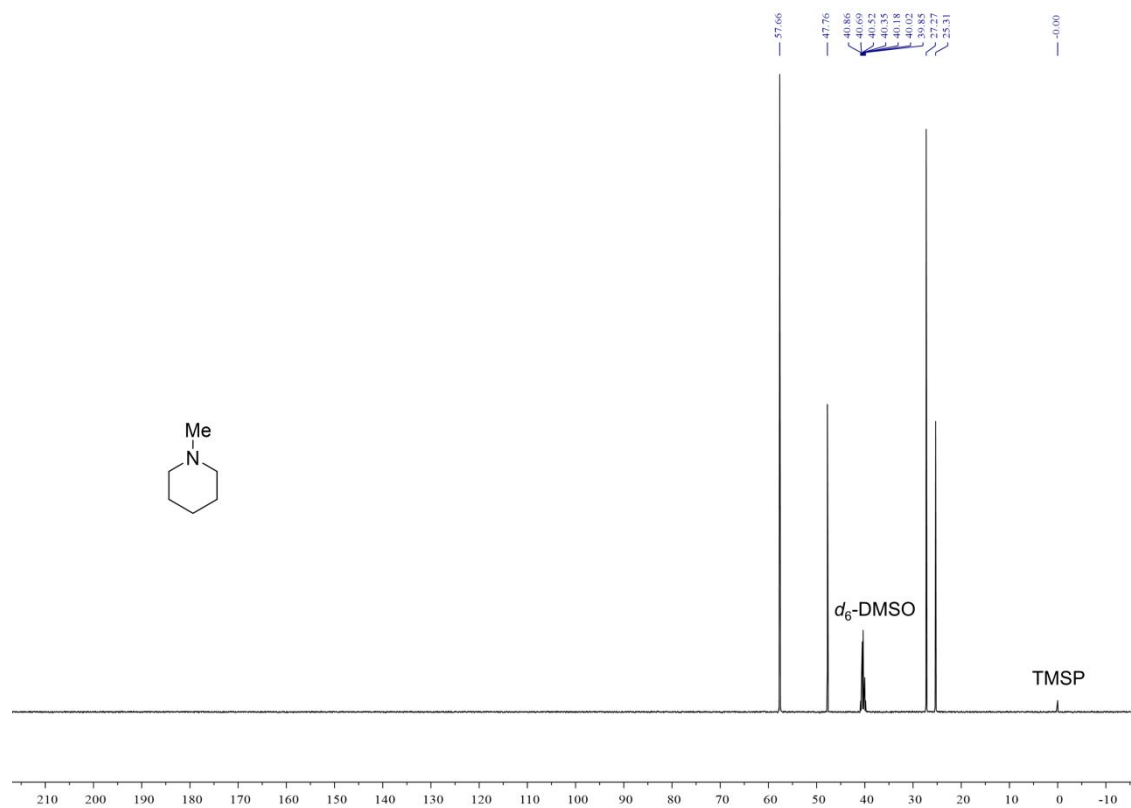

**Figure S42.** <sup>13</sup>C NMR spectrum of *N*-Me piperidine (**2**) in D<sub>2</sub>O (with additional 2 drops of *d*<sub>6</sub>-DMSO)

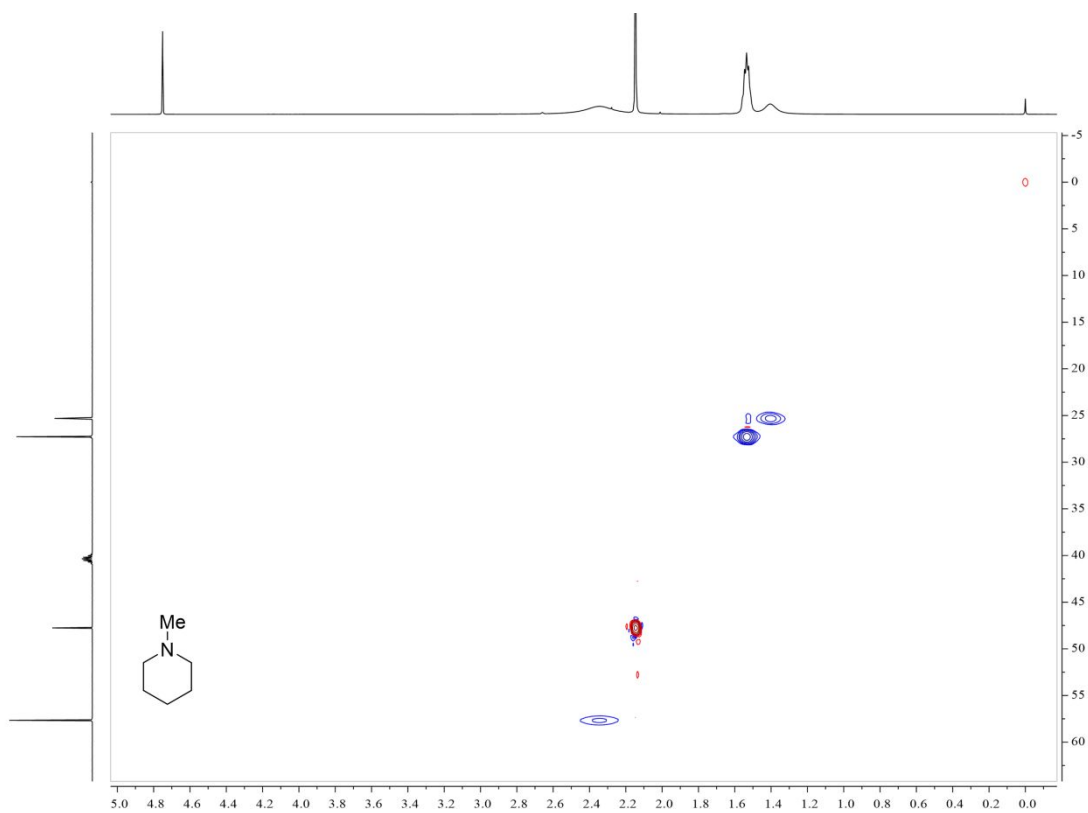

**Figure S43.** HSQC spectrum of *N*-Me piperidine (**2**) in D<sub>2</sub>O (with additional 2 drops of *d*<sub>6</sub>-DMSO)

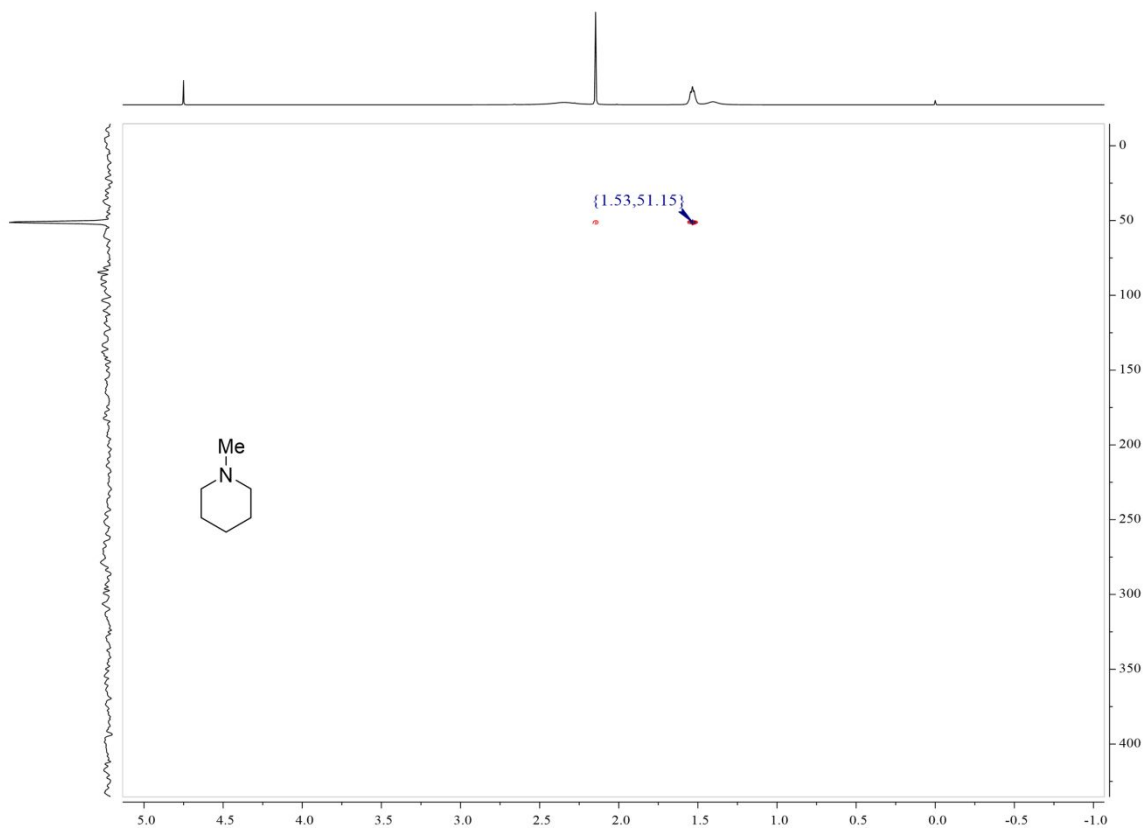

**Figure S44.** <sup>1</sup>H-<sup>15</sup>N HMBC spectrum of *N*-Me piperidine (**2**) in D<sub>2</sub>O (with additional 2 drops of *d*<sub>6</sub>-DMSO)

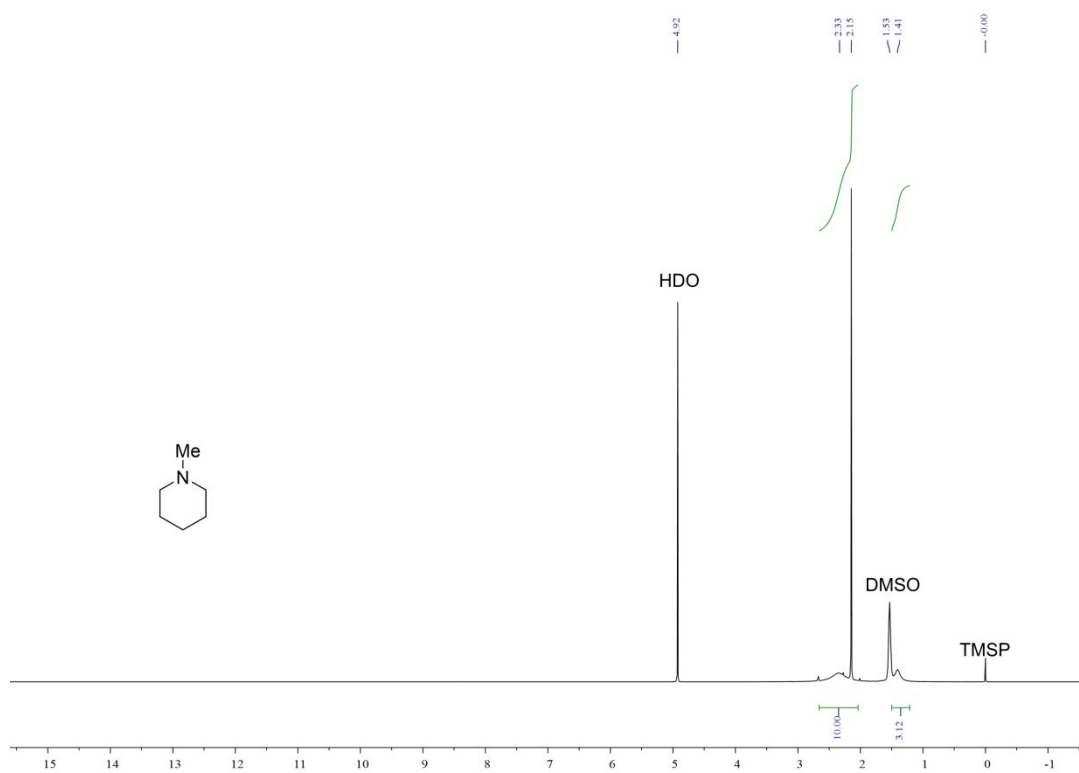

**Figure S45.** <sup>1</sup>H NMR spectrum of *N*-Me piperidine (**2**) in D<sub>2</sub>O (with additional 2 drops of *d*<sub>6</sub>-DMSO and drops of NaOD solution, 30% in D<sub>2</sub>O, w/w, pD ~13)

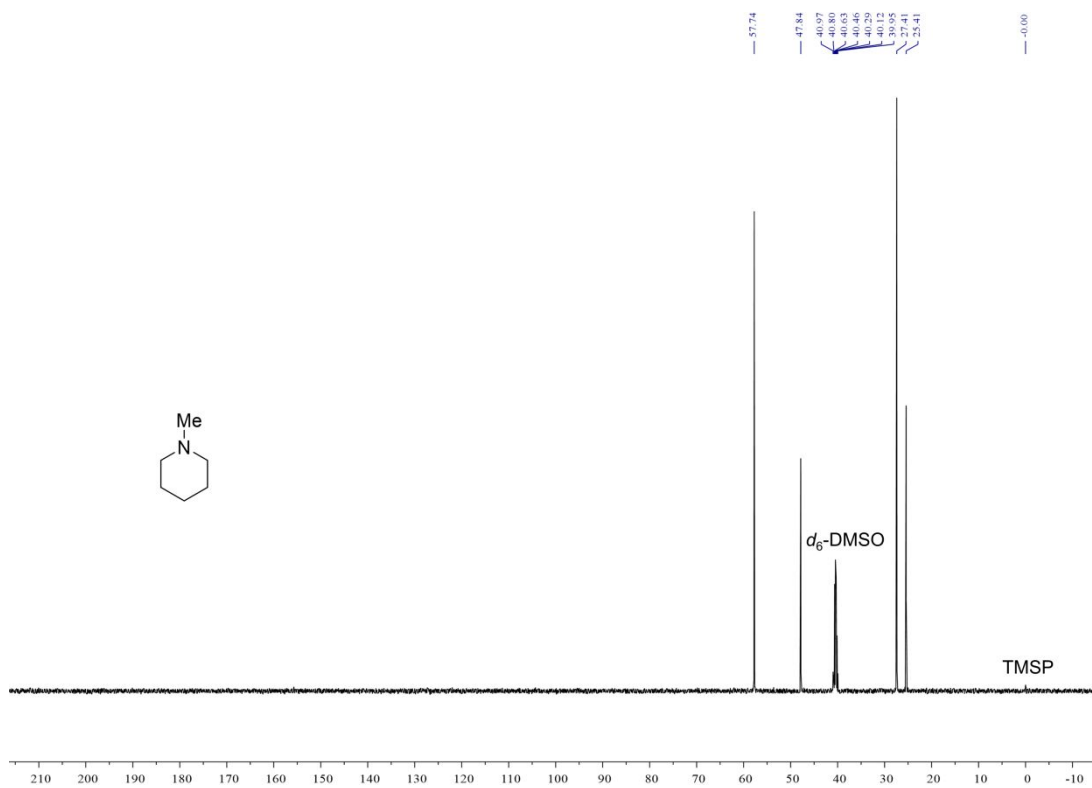

**Figure S46.** <sup>13</sup>C NMR spectrum of *N*-Me piperidine (**2**) in D<sub>2</sub>O (with additional 2 drops of *d*<sub>6</sub>-DMSO and drops of NaOD solution, 30% in D<sub>2</sub>O, w/w, pD ~13)



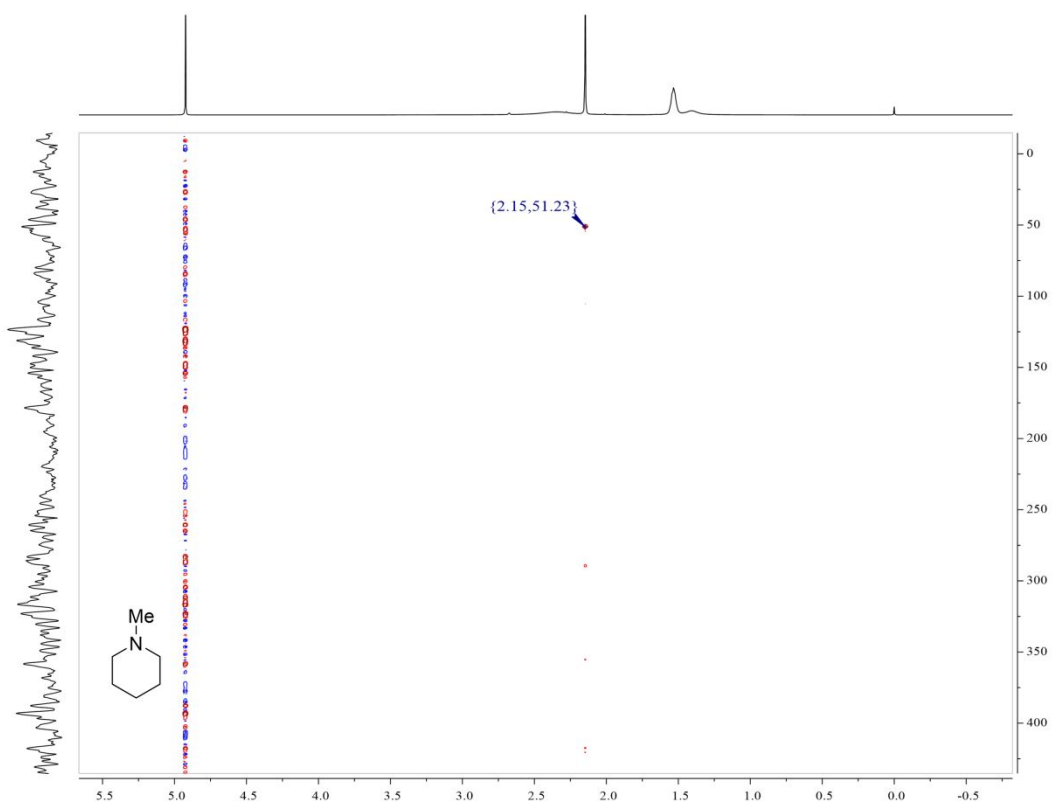

**Figure S47.**  $^1\text{H}$ - $^{15}\text{N}$  HMBC spectrum of *N*-Me piperidine (**2**) in  $\text{D}_2\text{O}$  (with additional 2 drops of  $d_6$ -DMSO and drops of NaOD solution, 30% in  $\text{D}_2\text{O}$ , w/w, pD ~13)

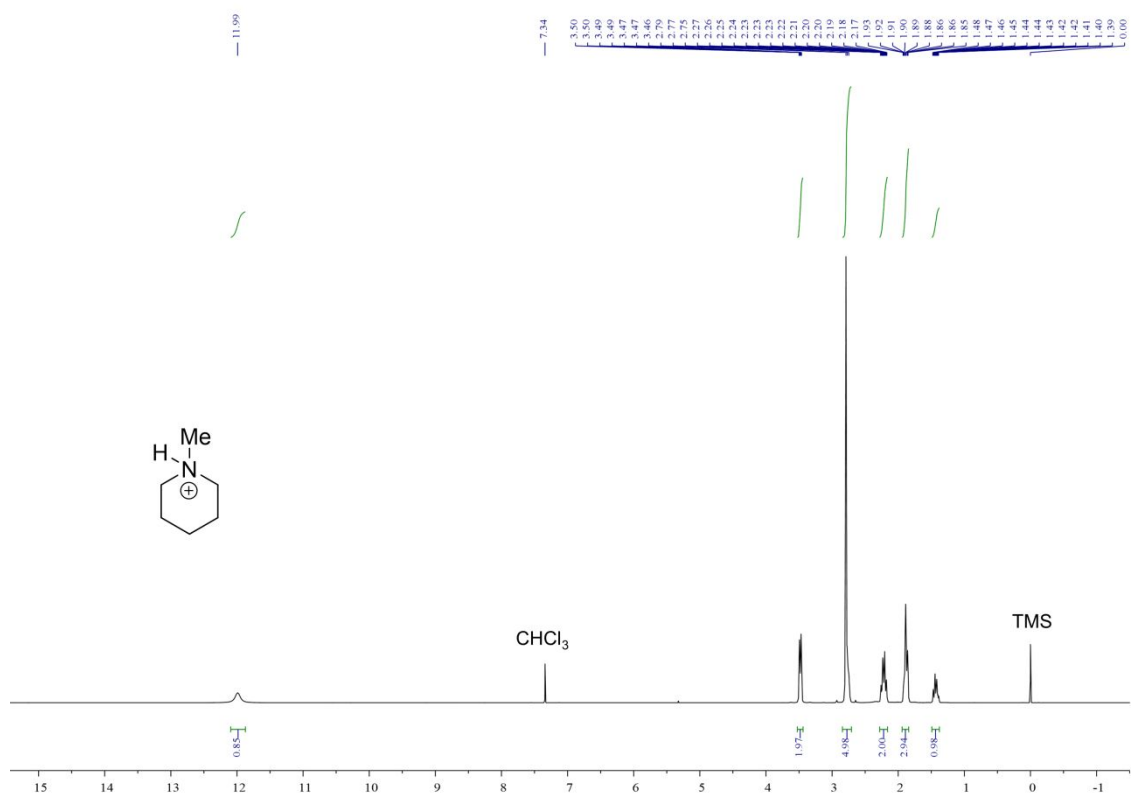

**Figure S48.**  $^1\text{H}$  NMR spectrum of *N*-Me piperidine HCl salt (**2'**) in  $\text{CDCl}_3$

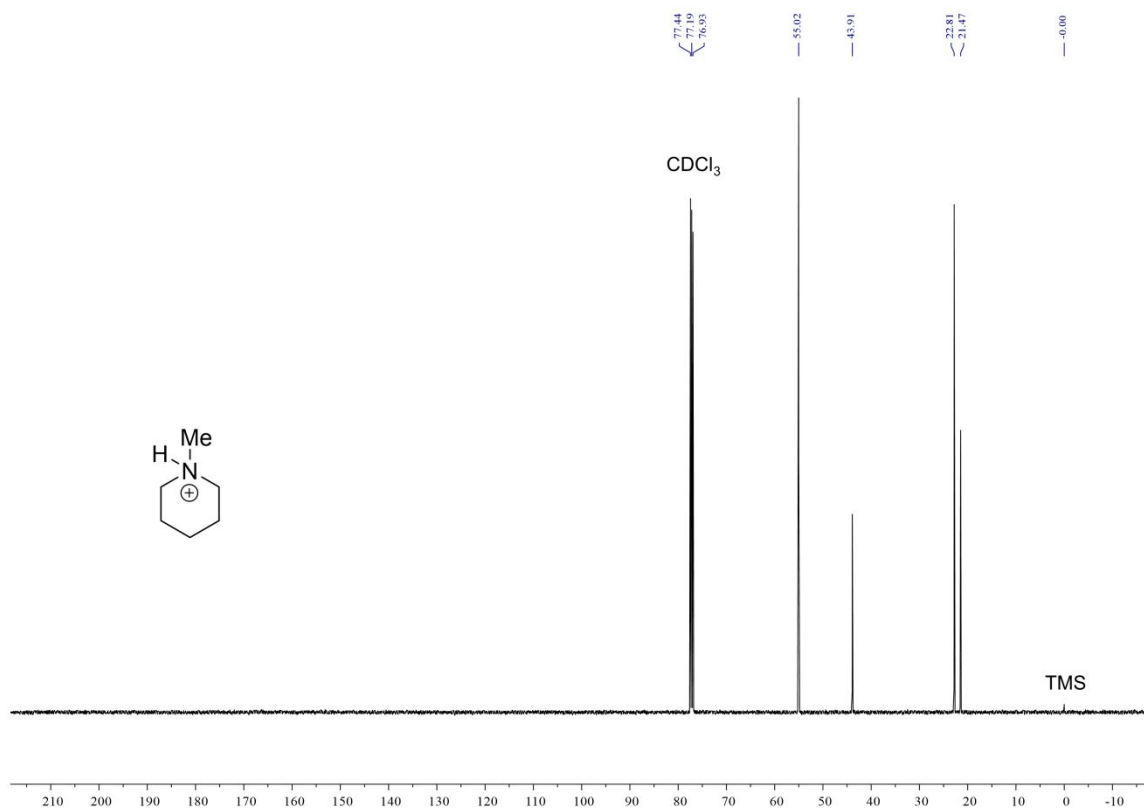

**Figure S49.**  $^{13}\text{C}$  NMR spectrum of *N*-Me piperidine HCl salt (**2'**) in  $\text{CDCl}_3$

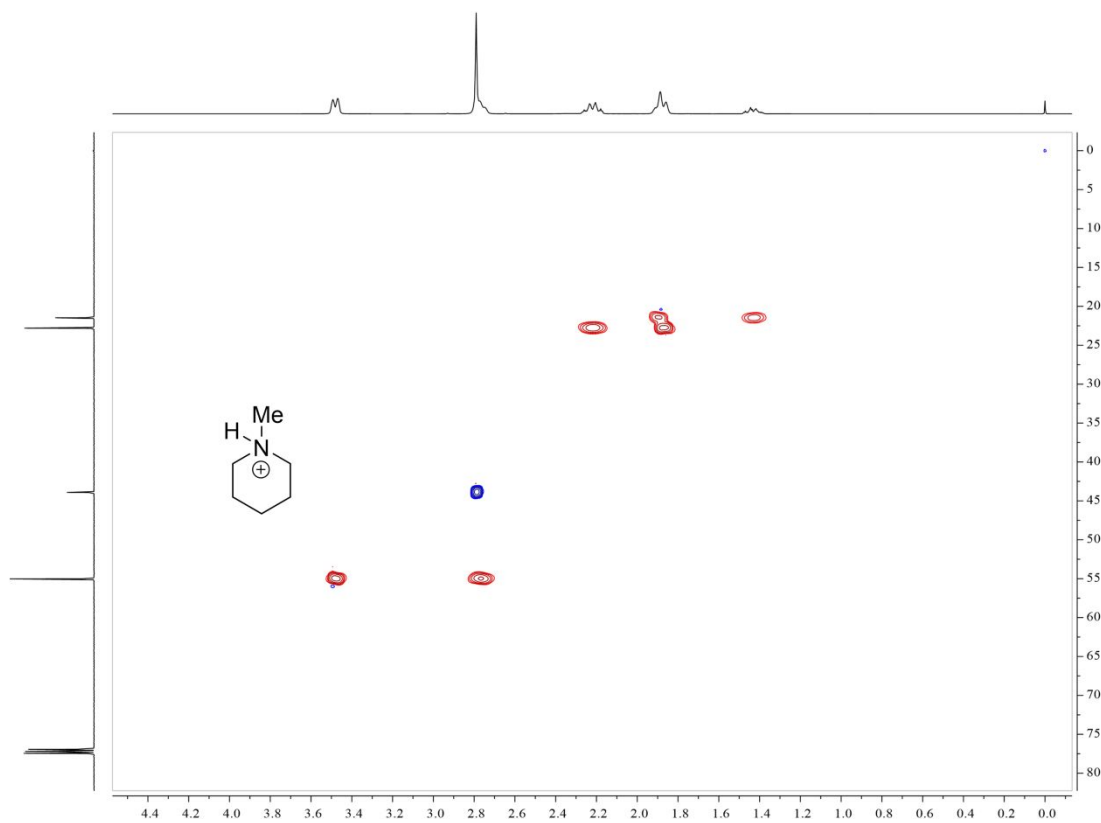

**Figure S50.** HSQC spectrum of *N*-Me piperidine HCl salt (**2'**) in  $\text{CDCl}_3$

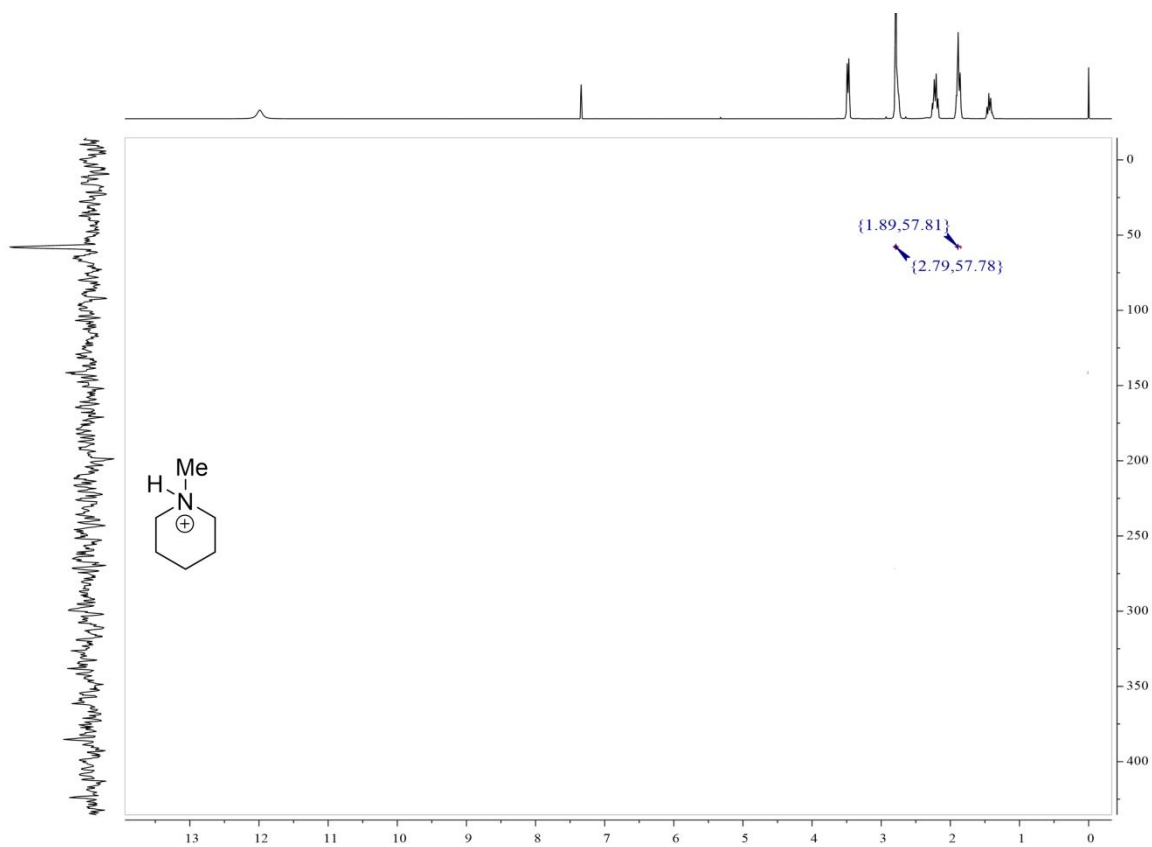

Figure S51.  $^1\text{H}$ - $^{15}\text{N}$  HMBC spectrum of *N*-Me piperidine HCl salt (**2'**) in  $\text{CDCl}_3$

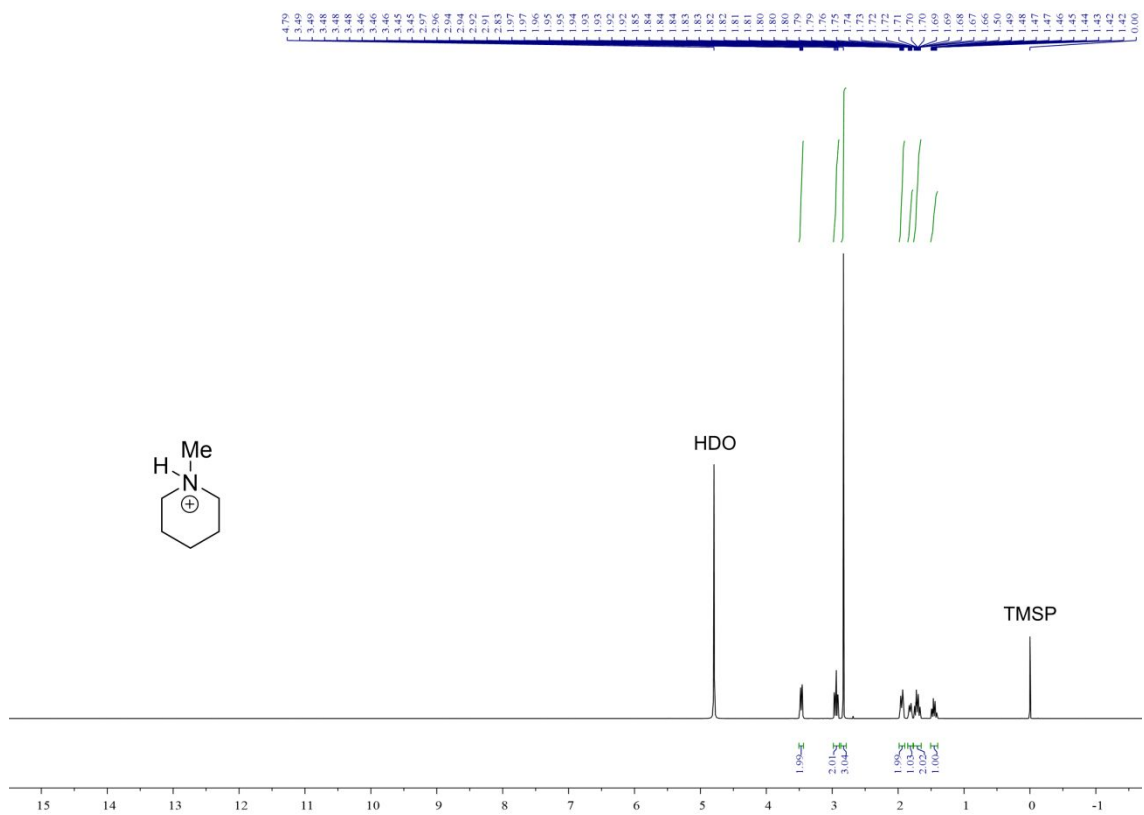

Figure S52.  $^1\text{H}$  NMR spectrum of *N*-Me piperidine HCl salt (**2'**) in  $\text{D}_2\text{O}$

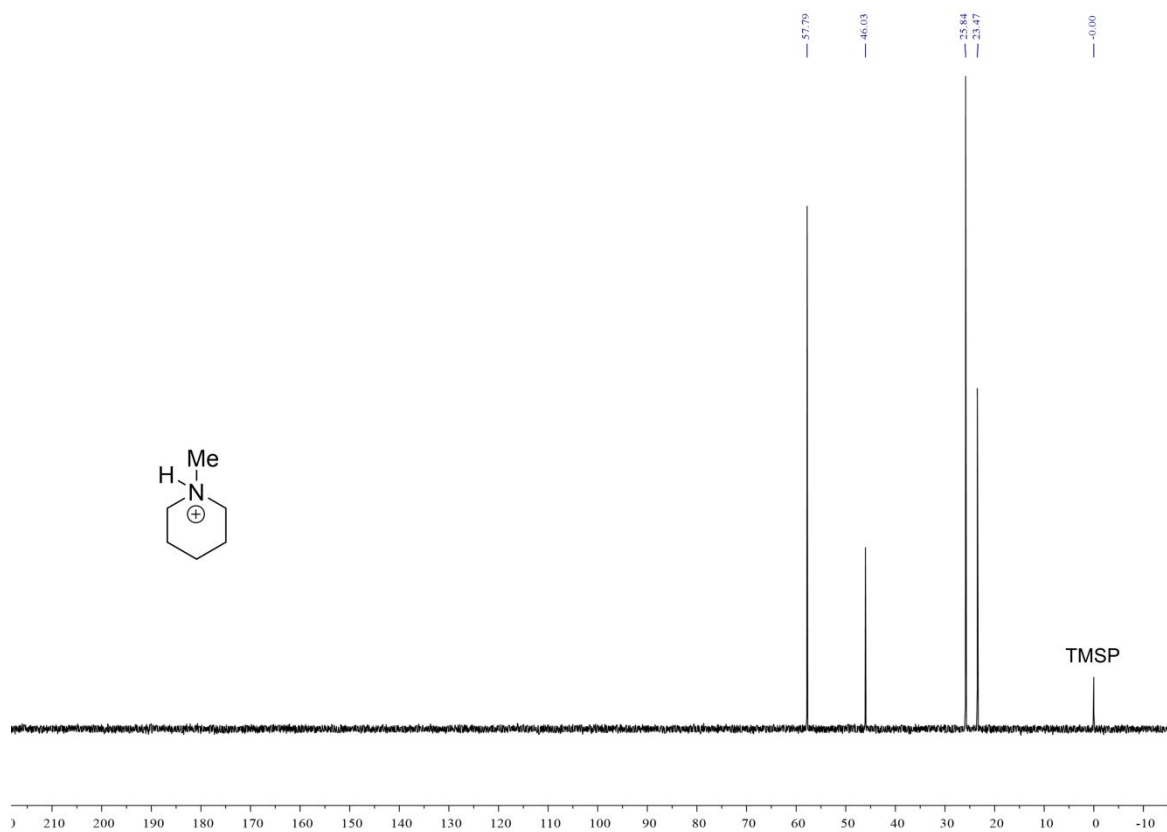

**Figure S53.**  $^{13}\text{C}$  NMR spectrum of *N*-Me piperidine HCl salt (**2'**) in  $\text{D}_2\text{O}$

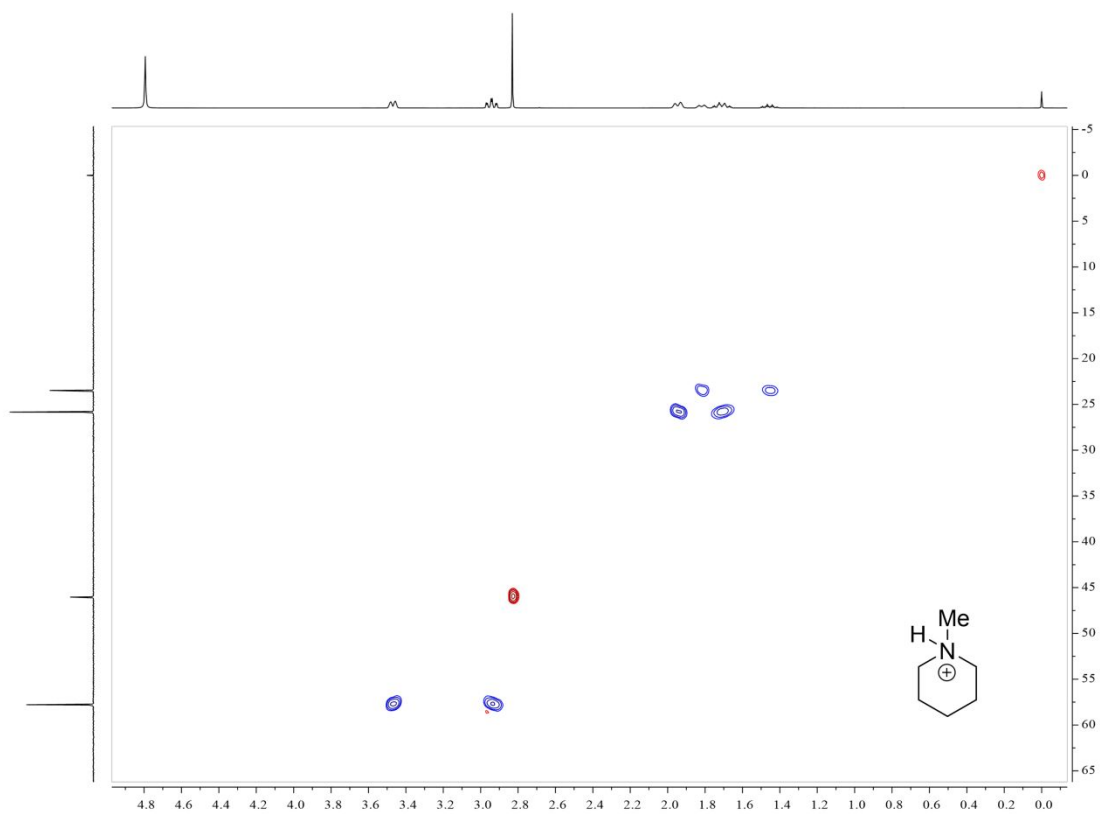

**Figure S54.** HSQC spectrum of *N*-Me piperidine HCl salt (**2'**) in  $\text{D}_2\text{O}$

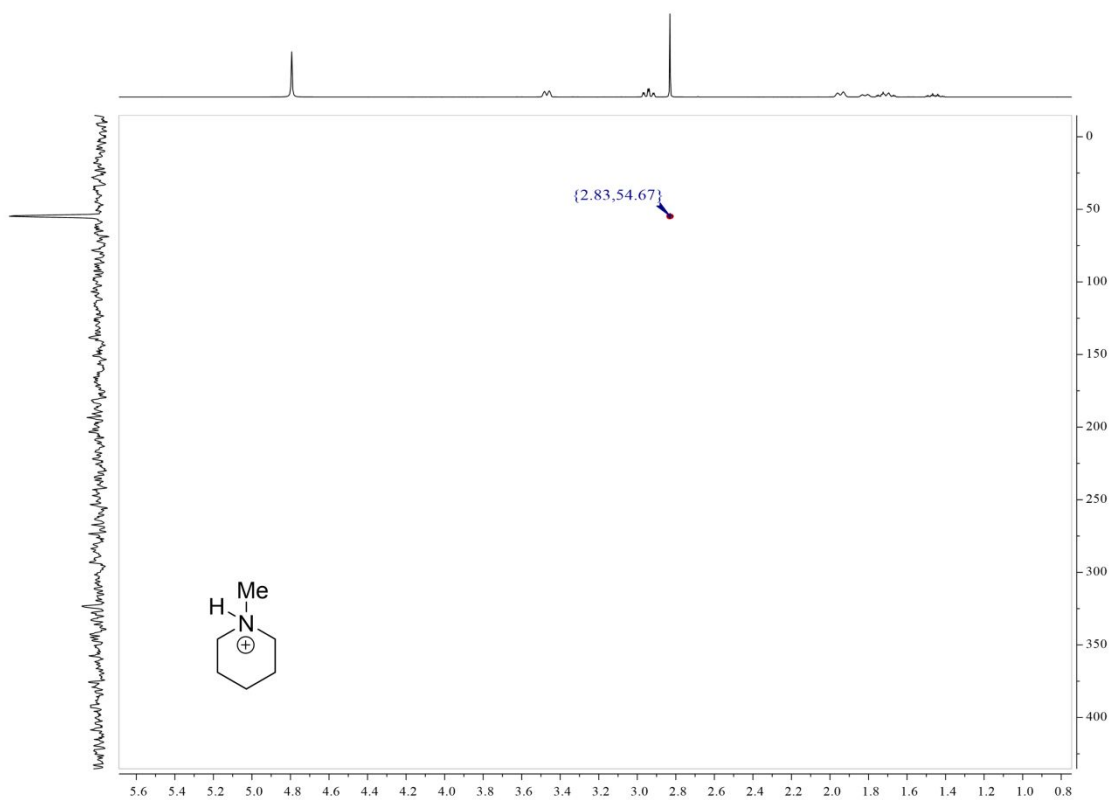

**Figure S55.**  $^1\text{H}$ - $^{15}\text{N}$  HMBC spectrum of *N*-Me piperidine HCl salt (**2'**) in  $\text{D}_2\text{O}$

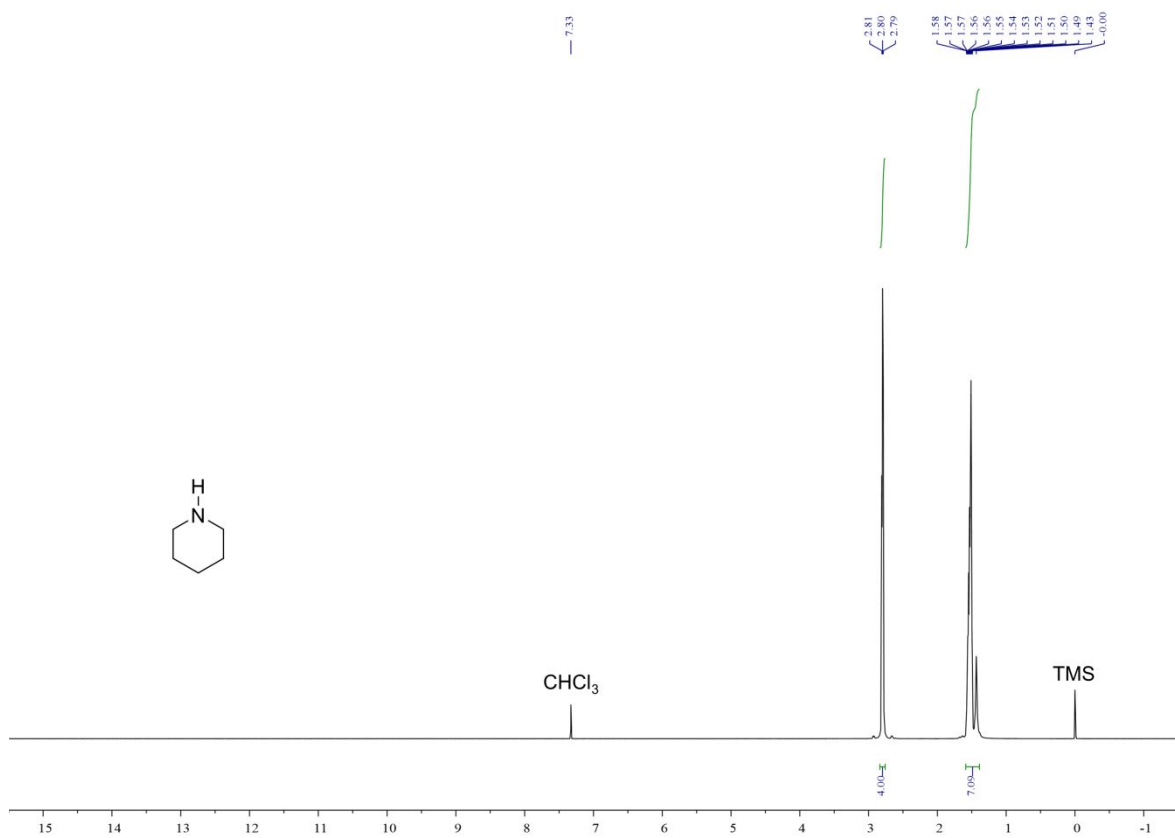

**Figure S56.**  $^1\text{H}$  NMR spectrum of *N*-H piperidine (**3**) in  $\text{CDCl}_3$

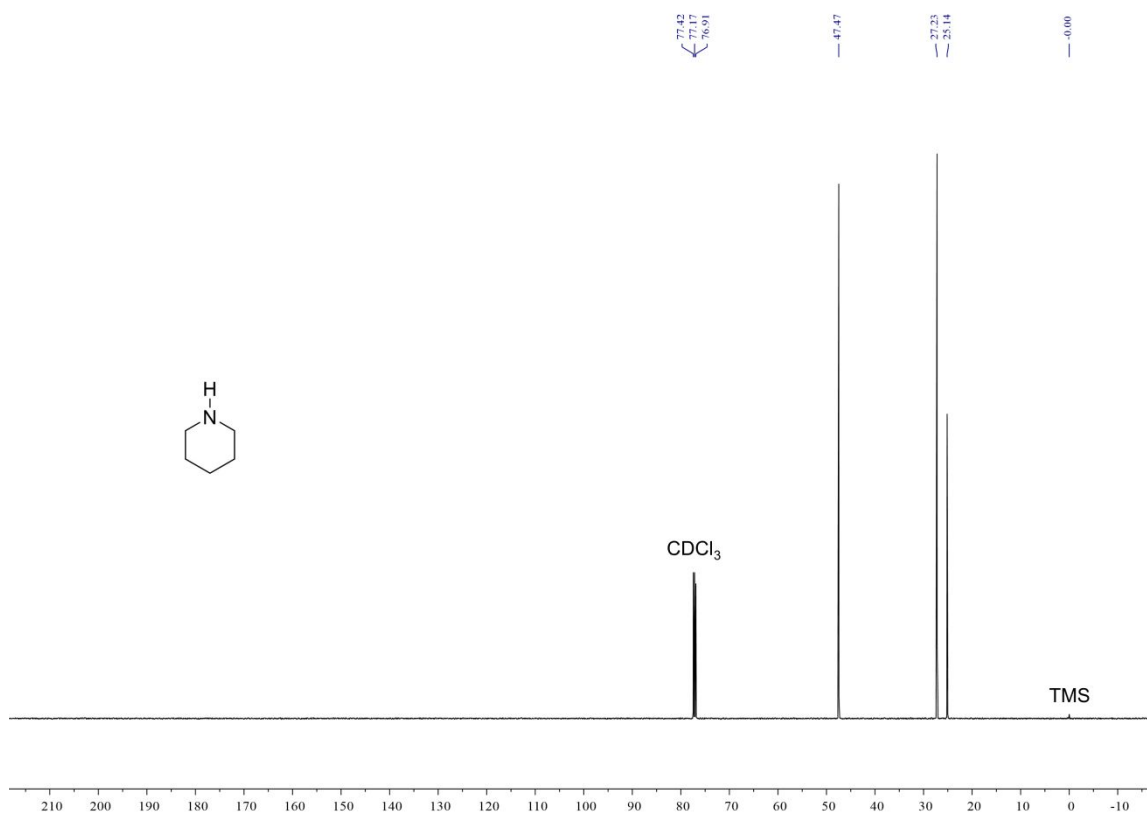

**Figure S57.**  $^{13}\text{C}$  NMR spectrum of *N*-H piperidine (3) in  $\text{CDCl}_3$

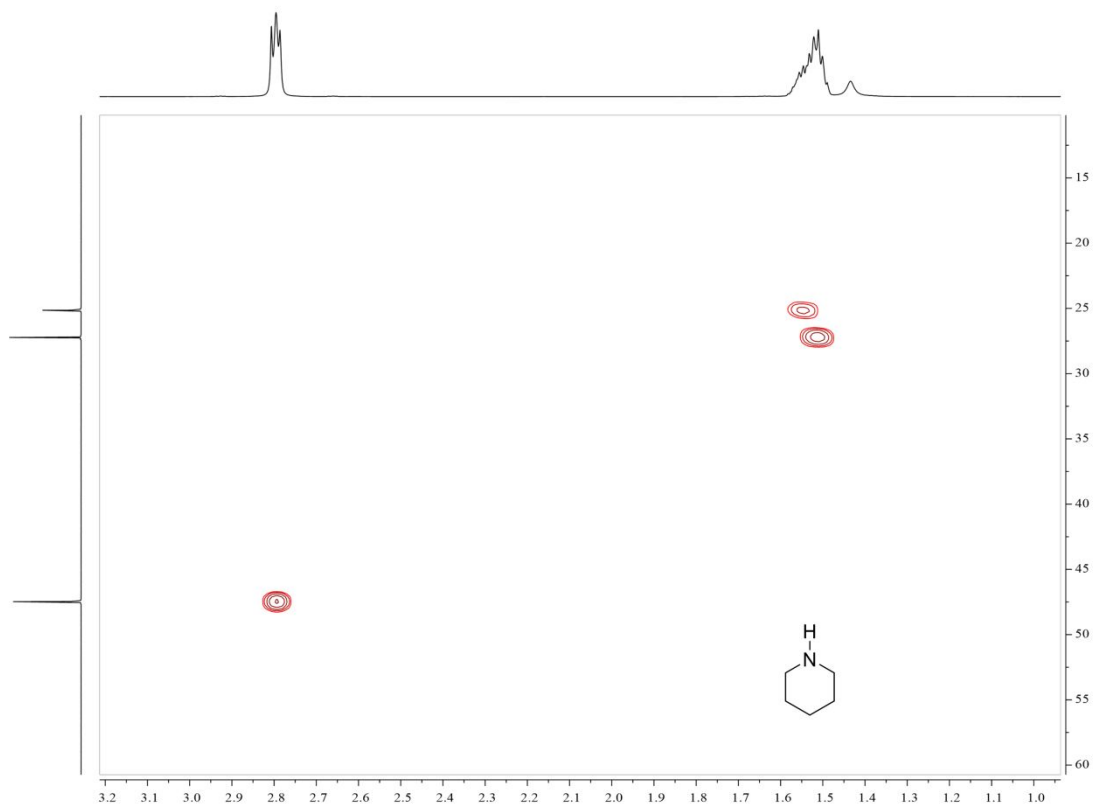

**Figure S58.** HSQC spectrum of *N*-H piperidine (3) in  $\text{CDCl}_3$

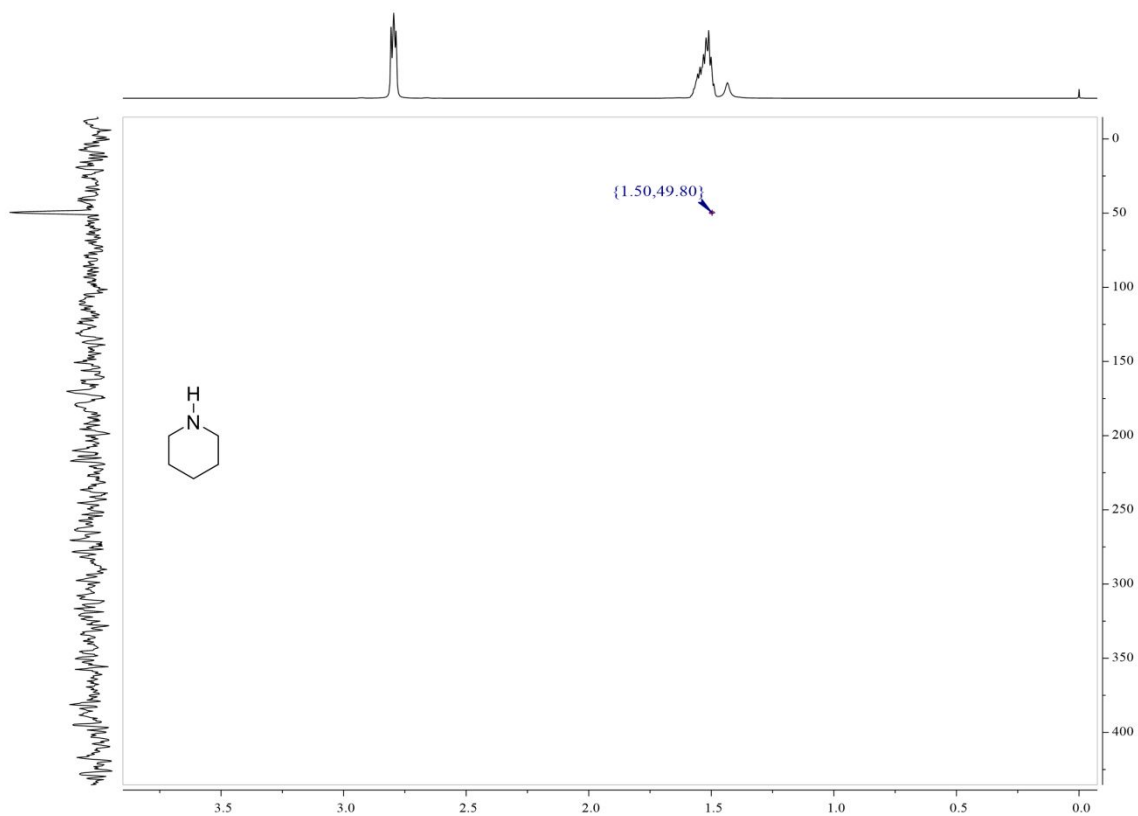

**Figure S59.**  $^1\text{H}$ - $^{15}\text{N}$  HMBC spectrum of *N*-H piperidine (**3**) in  $\text{CDCl}_3$

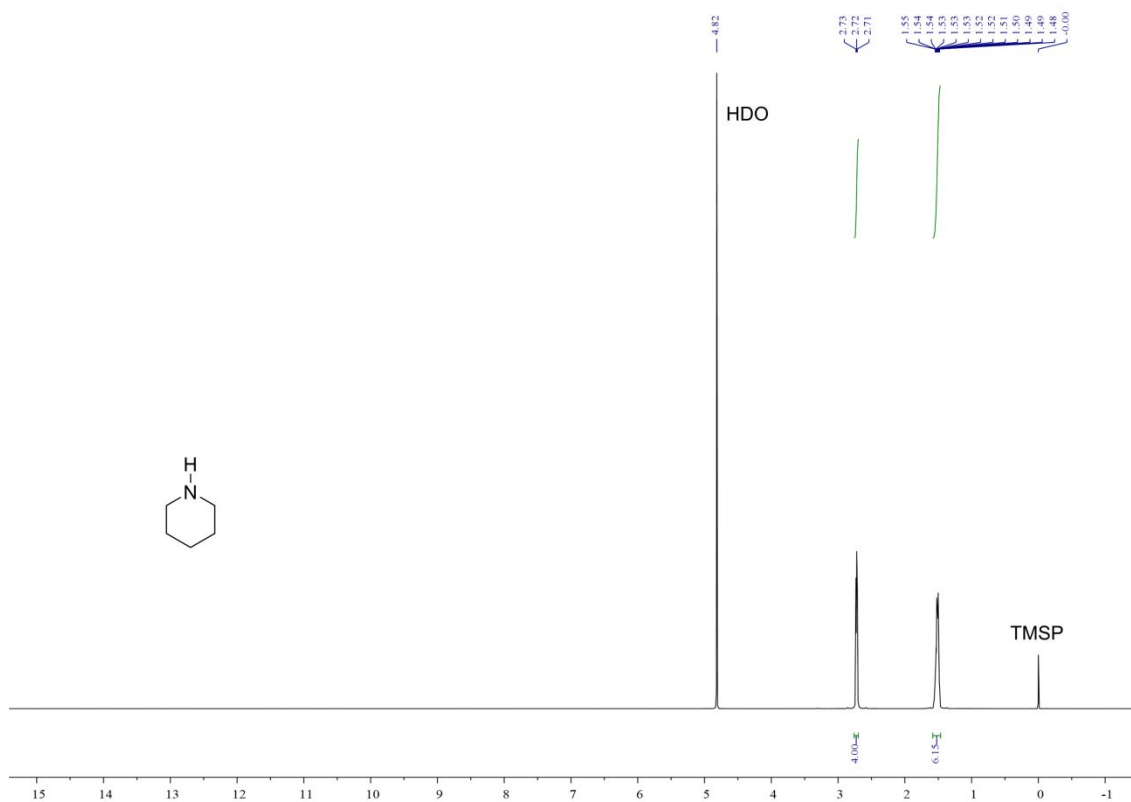

**Figure S60.**  $^1\text{H}$  NMR spectrum of *N*-H piperidine (**3**) in  $\text{D}_2\text{O}$

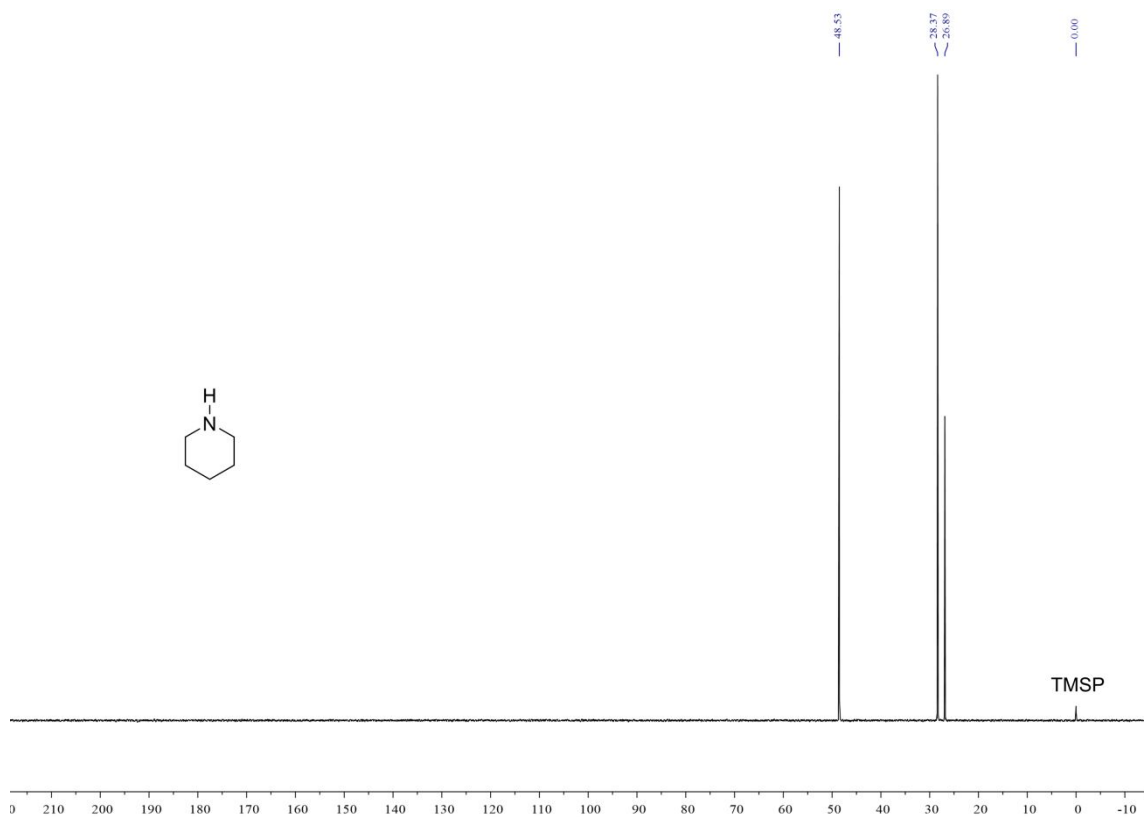

**Figure S61.**  $^{13}\text{C}$  NMR spectrum of *N*-H piperidine (3) in  $\text{D}_2\text{O}$

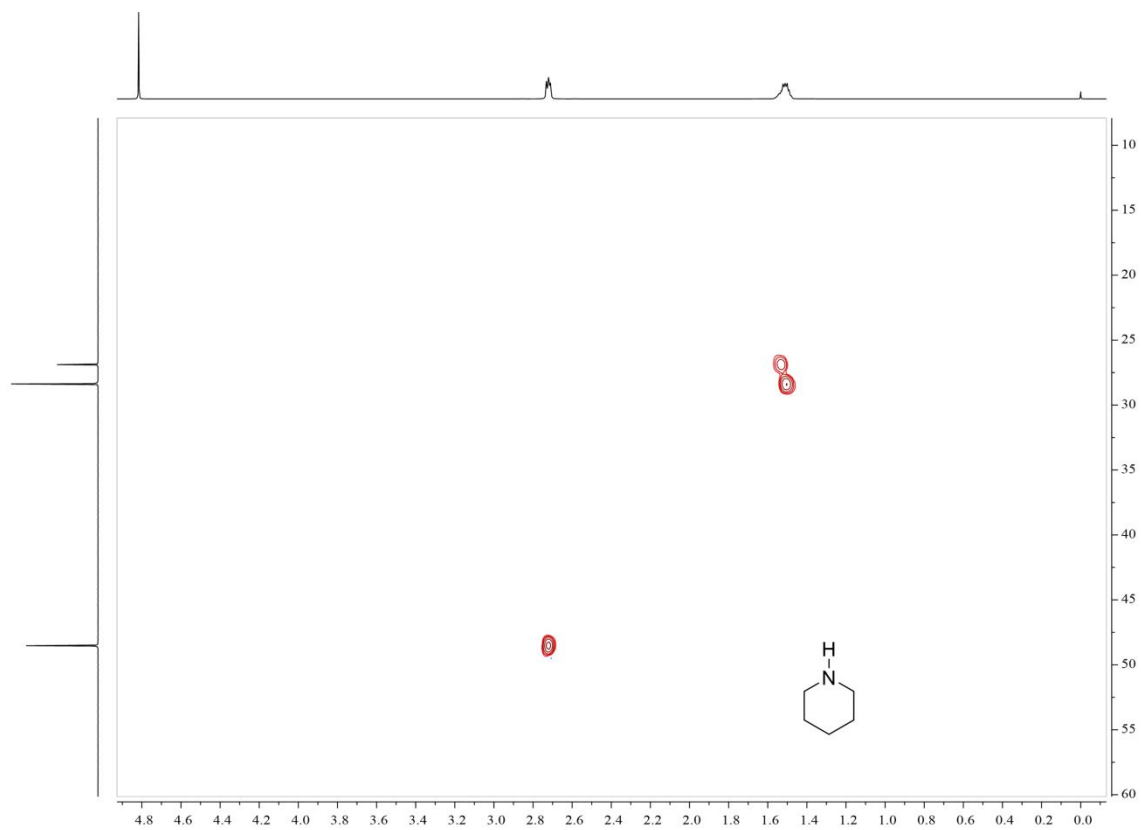

**Figure S62.** HSQC spectrum of *N*-H piperidine (3) in  $\text{D}_2\text{O}$



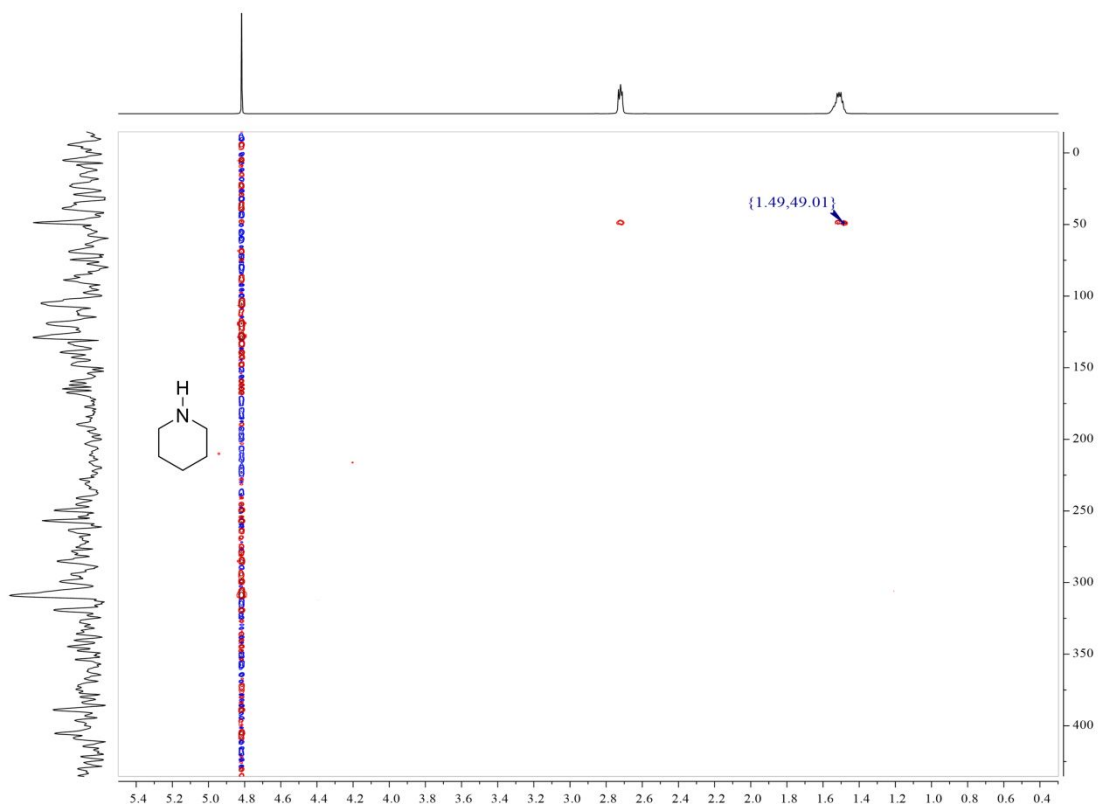

**Figure S63.**  $^1\text{H}$ - $^{15}\text{N}$  HMBC spectrum of *N*-H piperidine (**3**) in  $\text{D}_2\text{O}$

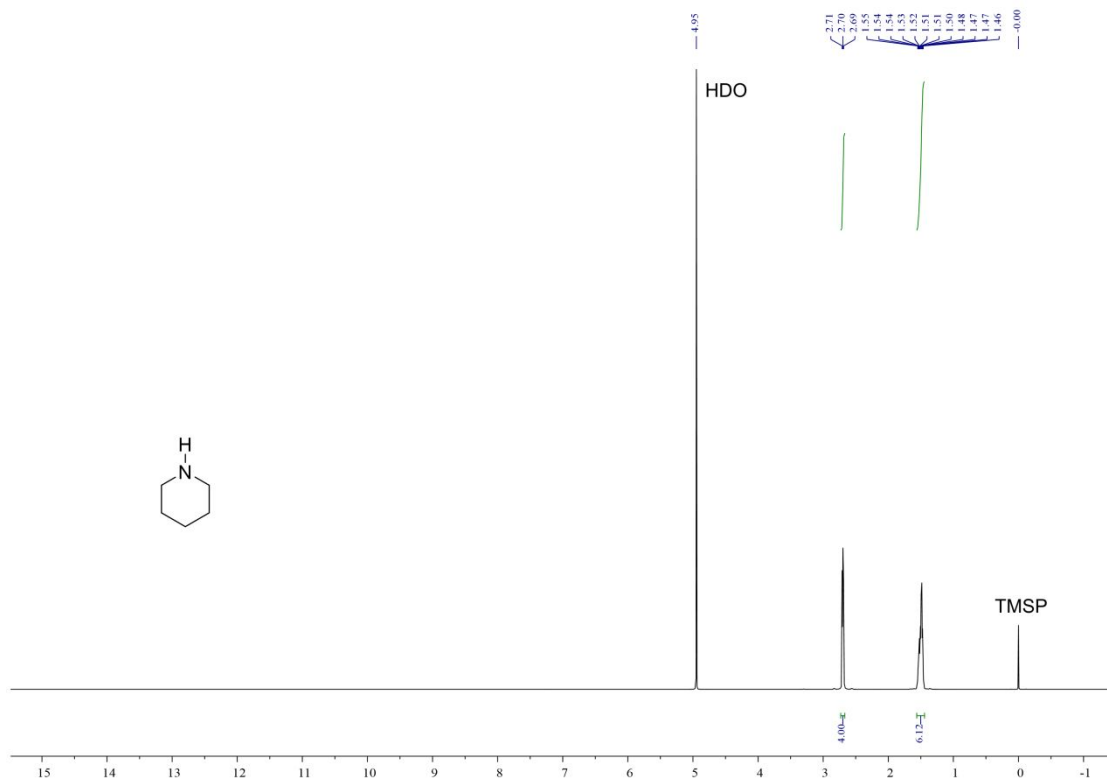

**Figure S64.**  $^1\text{H}$  NMR spectrum of *N*-H piperidine (**3**) in  $\text{D}_2\text{O}$  (with additional drops of NaOD solution, 30% in  $\text{D}_2\text{O}$ , w/w, pD ~13)

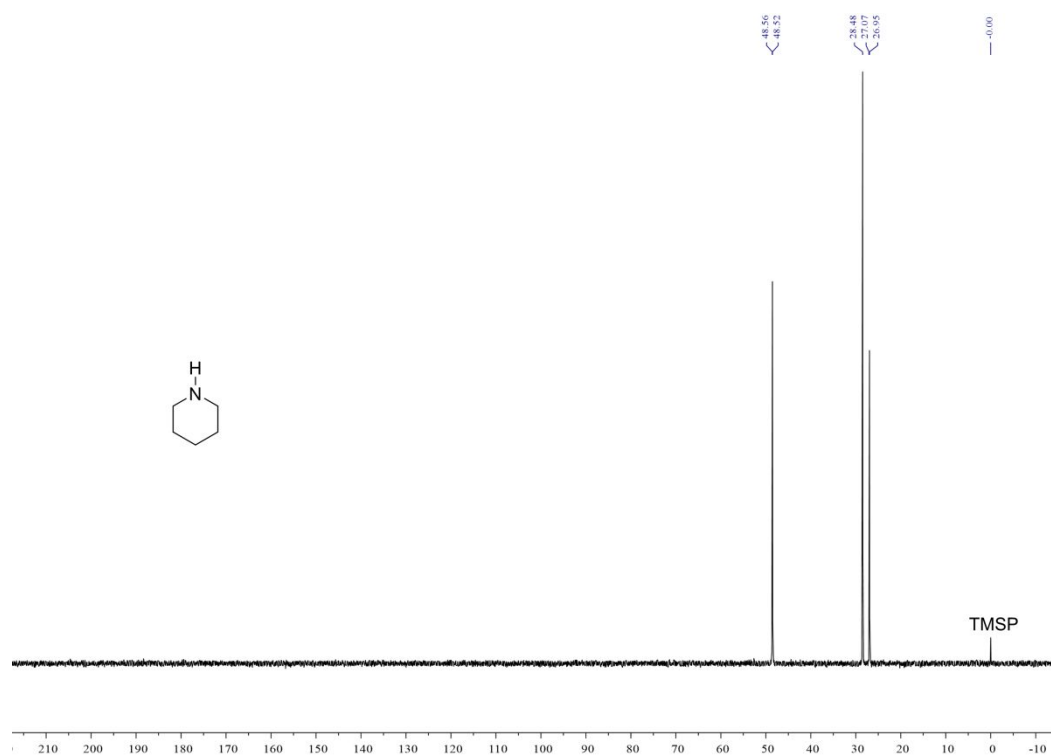

**Figure S65.**  $^{13}\text{C}$  NMR spectrum of *N*-H piperidine (**3**) in  $\text{D}_2\text{O}$  (with additional drops of NaOD solution, 30% in  $\text{D}_2\text{O}$ , w/w, pD ~13)

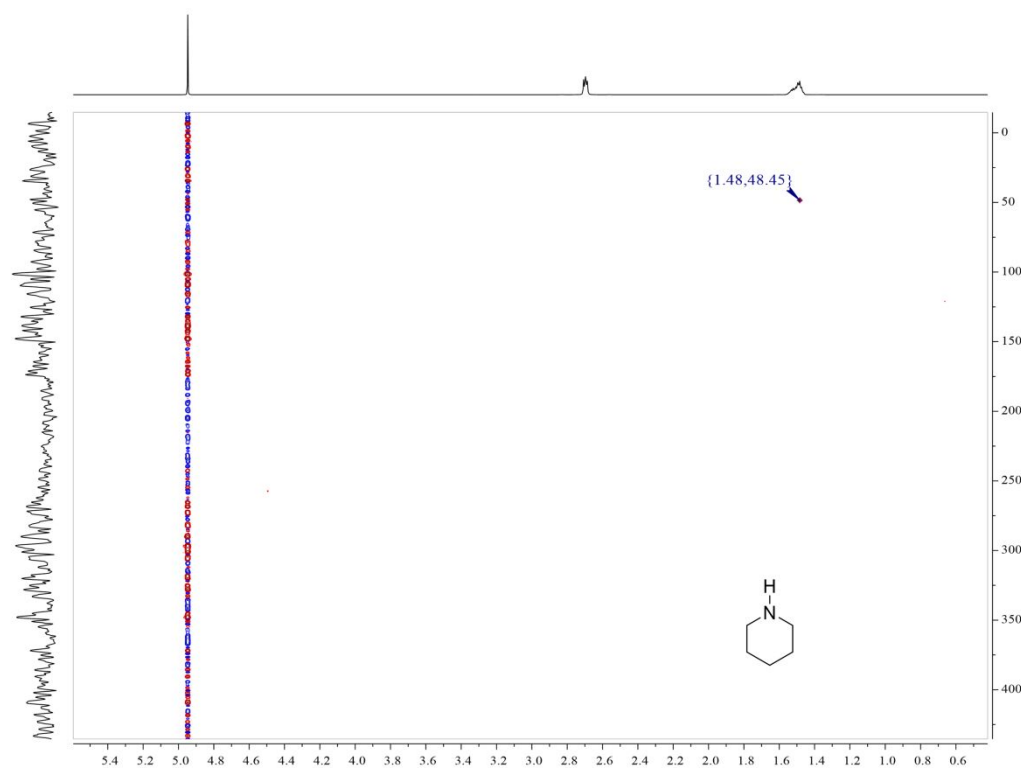

**Figure S66.**  $^1\text{H}$ - $^{15}\text{N}$  HMBC spectrum of *N*-H piperidine (**3**) in  $\text{D}_2\text{O}$  (with additional drops of NaOD solution, 30% in  $\text{D}_2\text{O}$ , w/w, pD ~13)

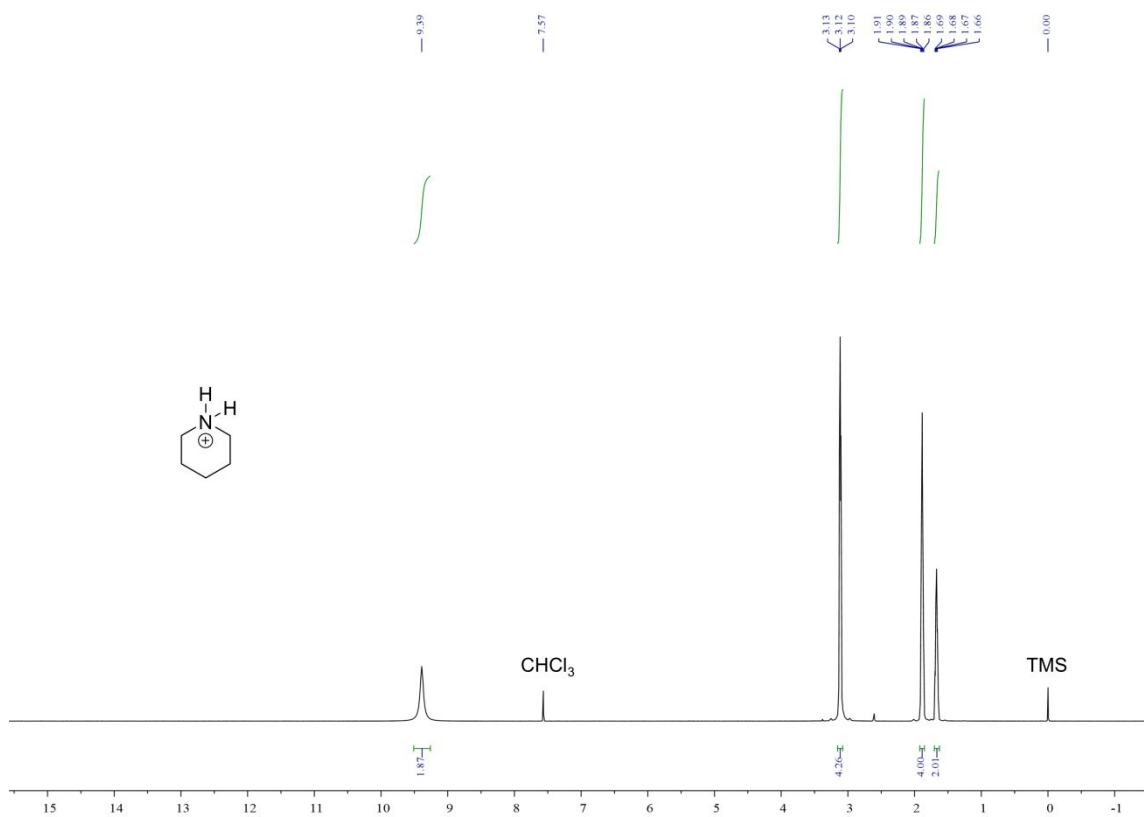

**Figure S67.** <sup>1</sup>H NMR spectrum of *N*-H piperidine HCl salt (**3'**) in CDCl<sub>3</sub> (with additional 2 drops of *d*<sub>6</sub>-DMSO)

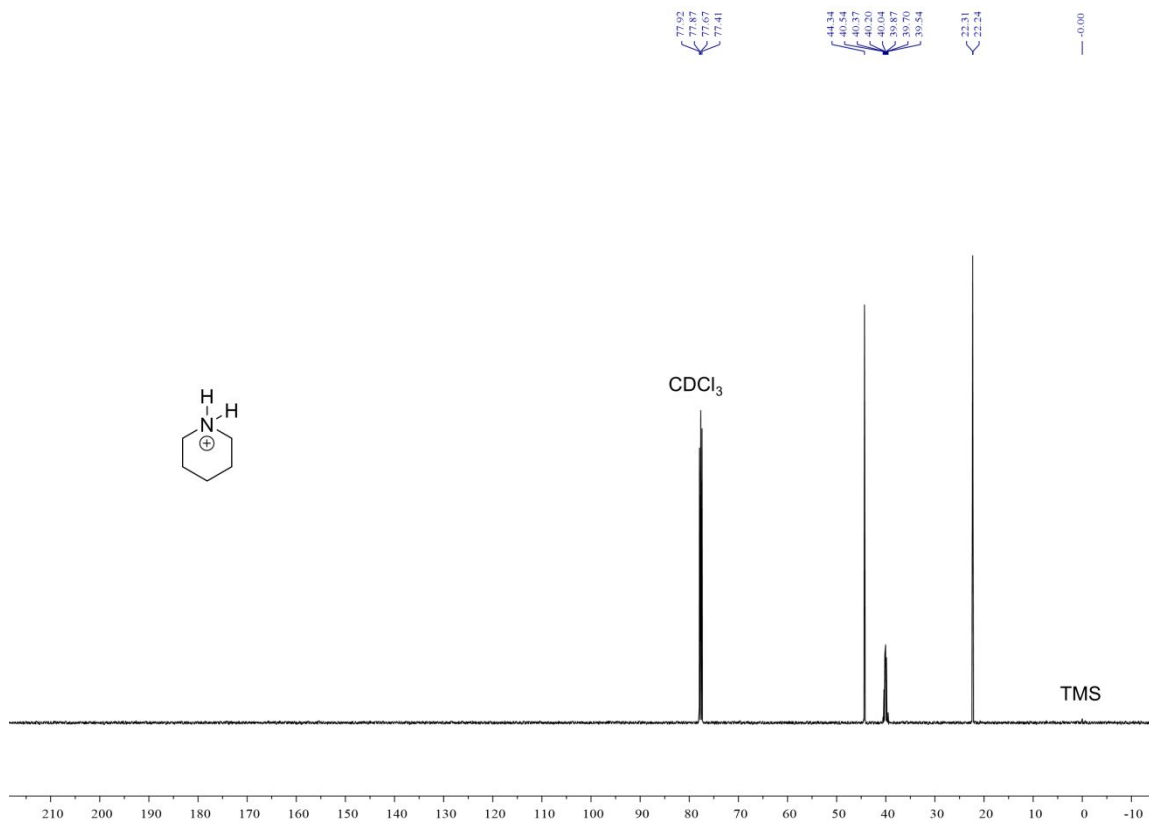

**Figure S68.** <sup>13</sup>C NMR spectrum of *N*-H piperidine HCl salt (**3'**) in CDCl<sub>3</sub> (with additional 2 drops of *d*<sub>6</sub>-DMSO)

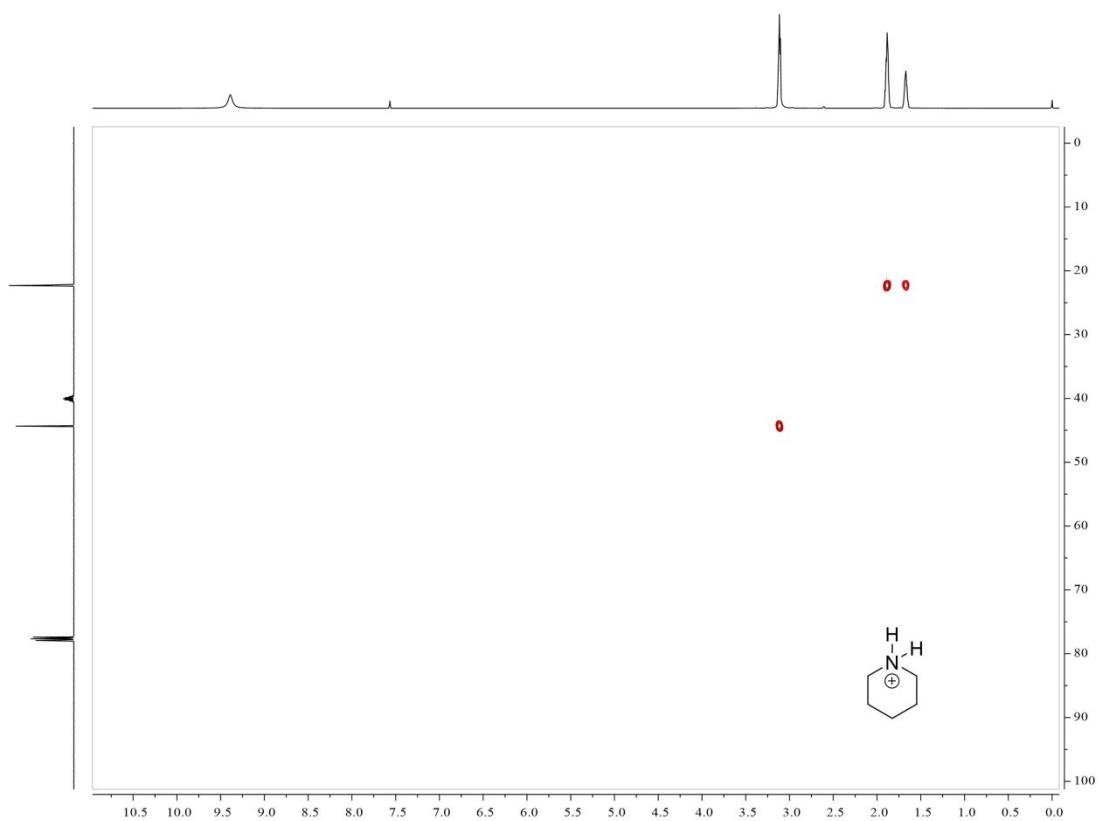

**Figure S69.** HSQC spectrum of *N*-H piperidine HCl salt (**3'**) in CDCl<sub>3</sub> (with additional 2 drops of *d*<sub>6</sub>-DMSO)

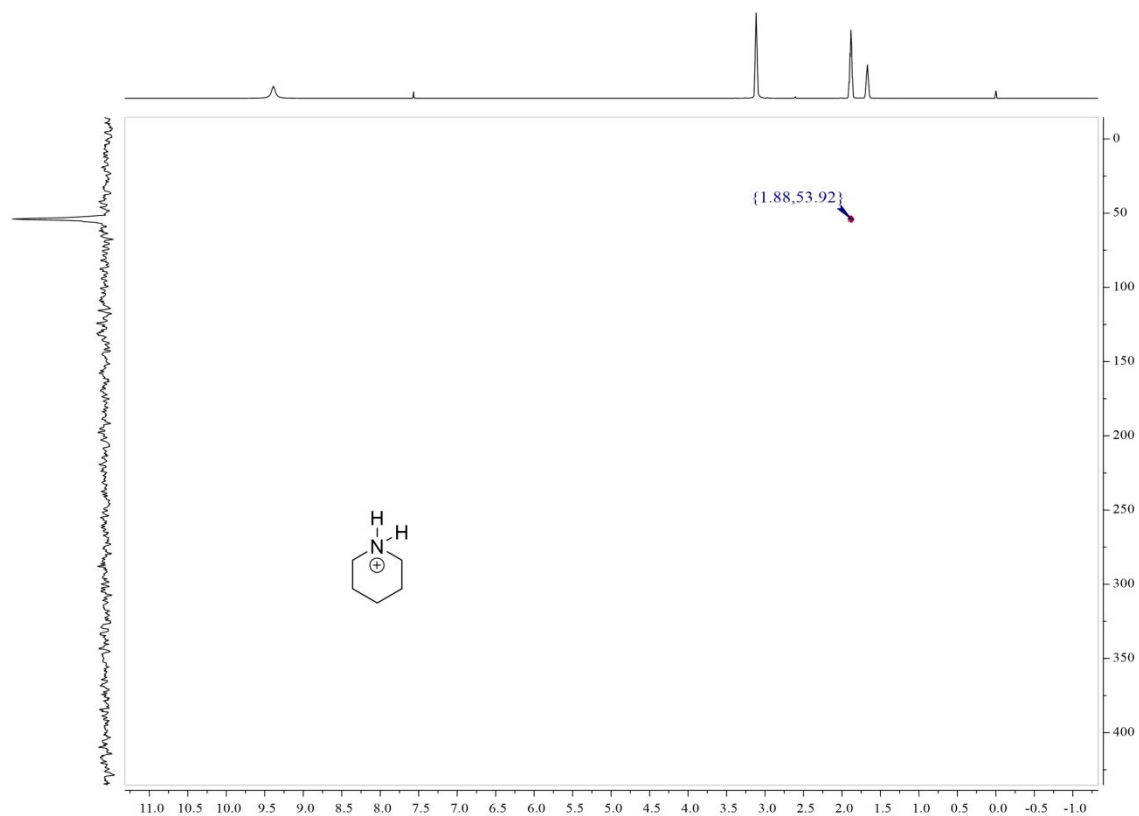

**Figure S70.** <sup>1</sup>H-<sup>15</sup>N HMBC spectrum of *N*-H piperidine HCl salt (**3'**) in CDCl<sub>3</sub> (with additional 2 drops of *d*<sub>6</sub>-DMSO)

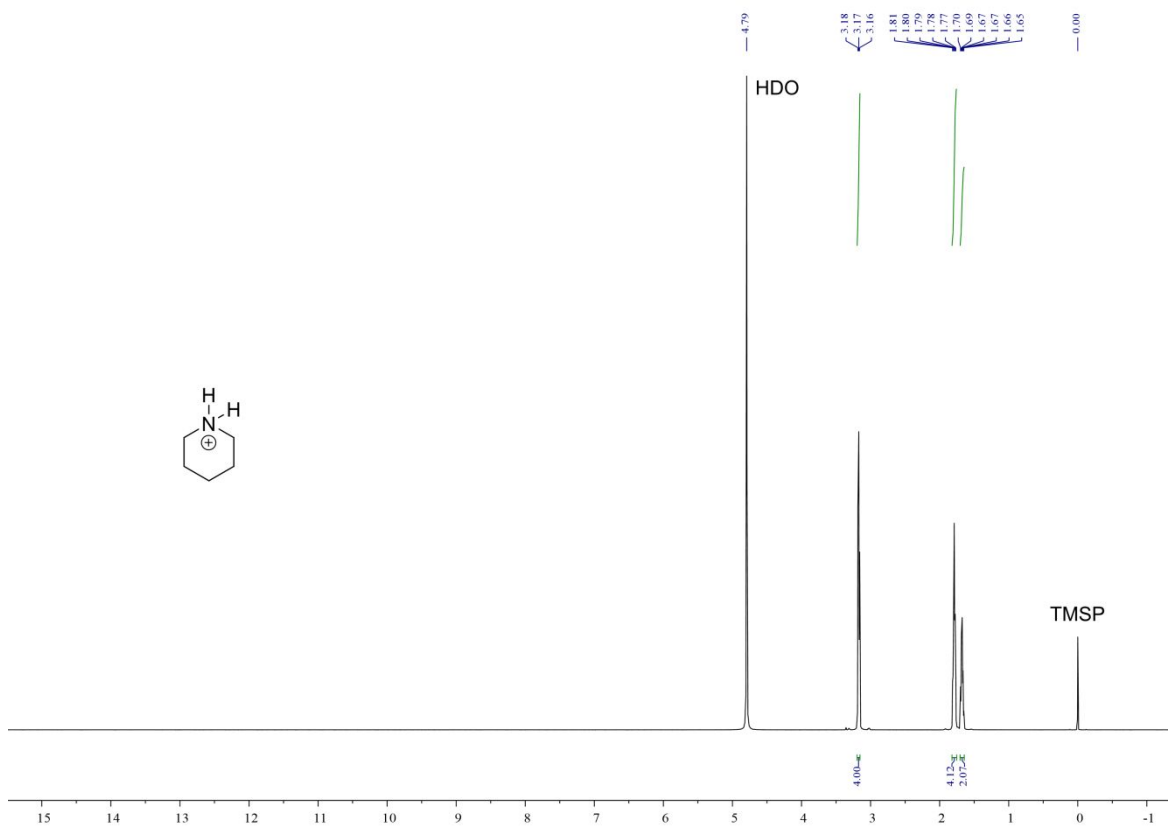

**Figure S71.** <sup>1</sup>H NMR spectrum of *N*-H piperidine HCl salt (**3'**) in D<sub>2</sub>O

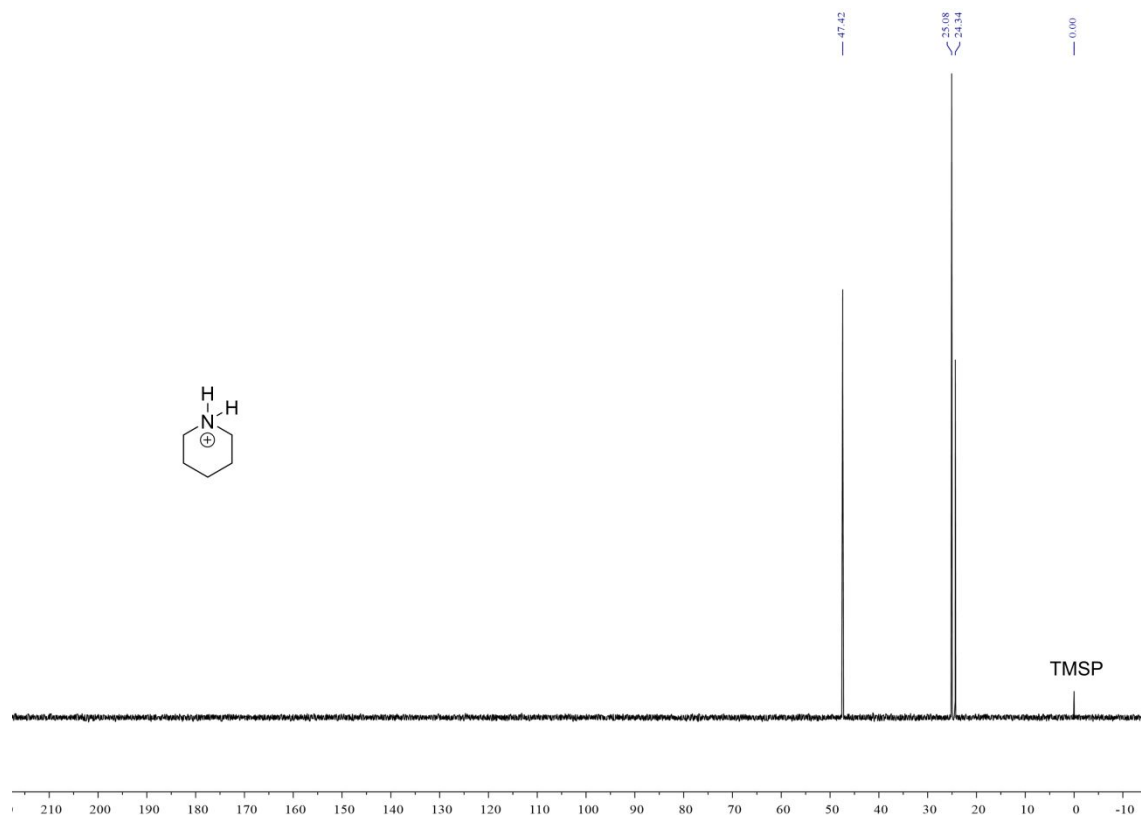

**Figure S72.** <sup>13</sup>C NMR spectrum of *N*-H piperidine HCl salt (**3'**) in D<sub>2</sub>O

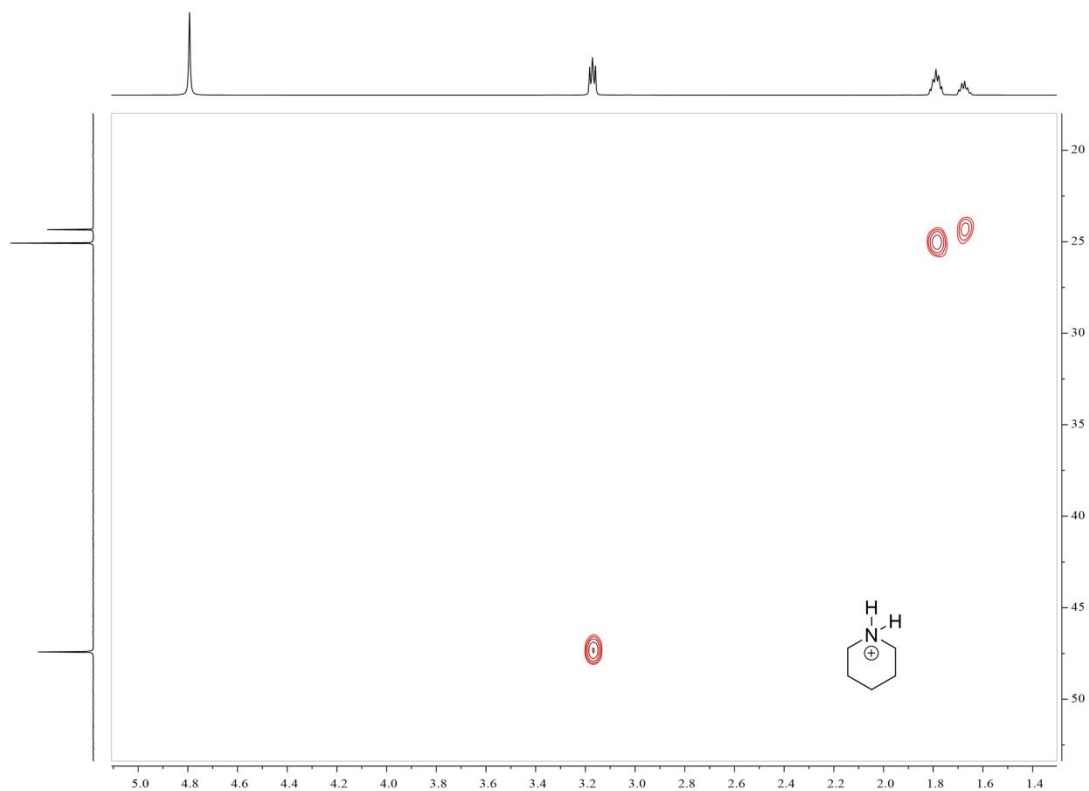

**Figure S73.** HSQC spectrum of *N*-H piperidine HCl salt (**3'**) in D<sub>2</sub>O

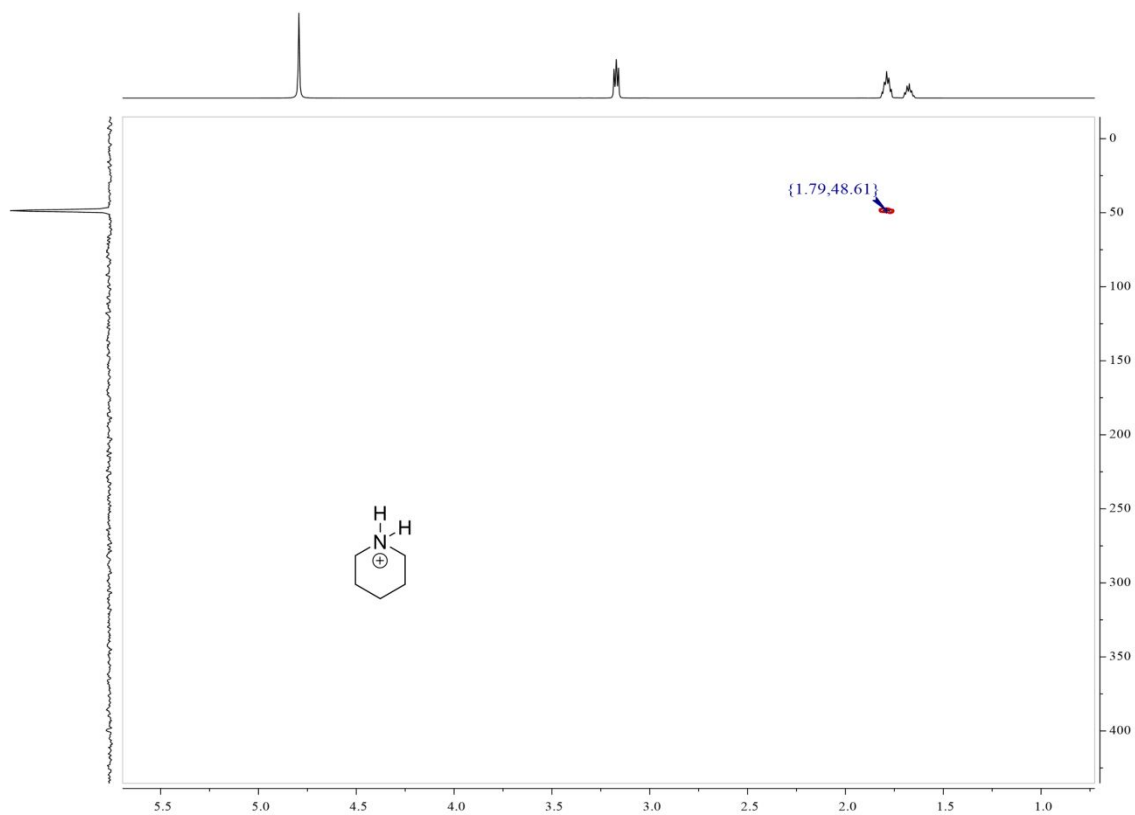

**Figure S74.** <sup>1</sup>H-<sup>15</sup>N HMBC spectrum of *N*-H piperidine HCl salt (**3'**) in D<sub>2</sub>O

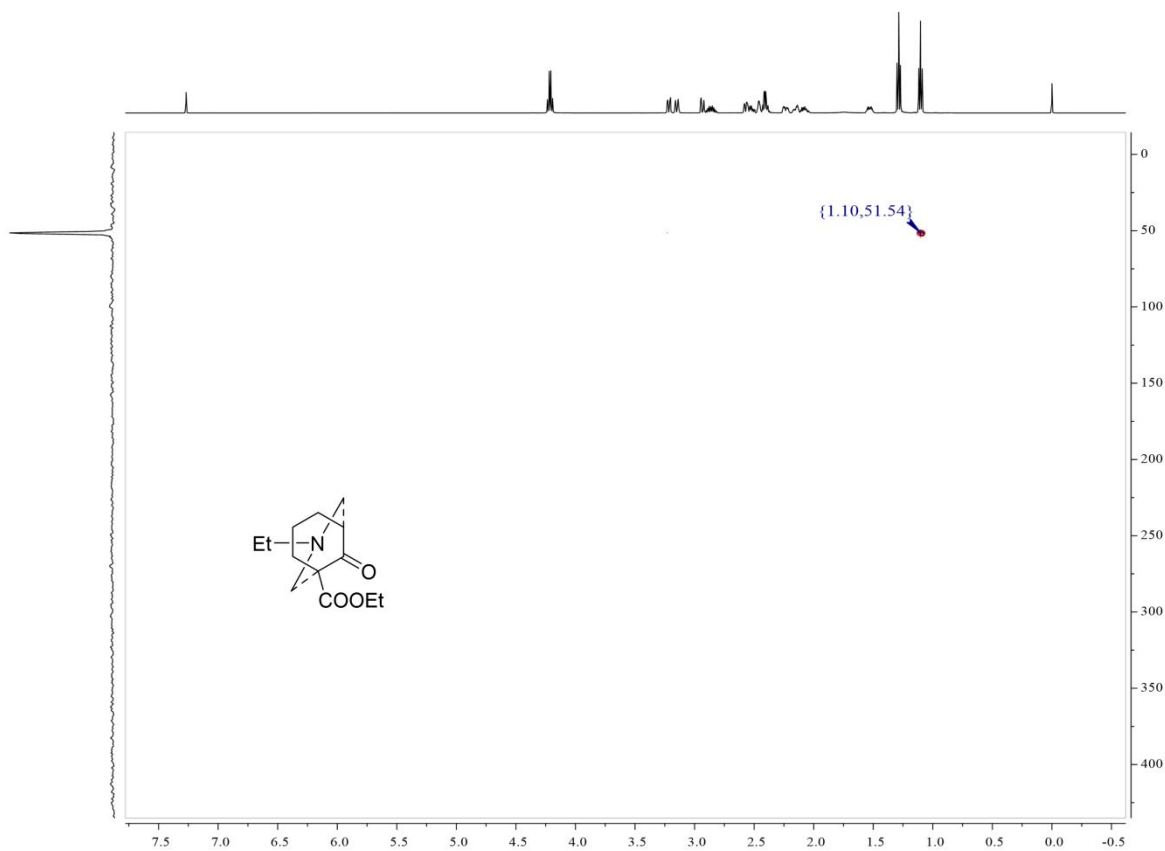

**Figure S75.**  $^1\text{H}$ - $^{15}\text{N}$  HMBC spectrum of *N*-Et [3.3.1]azabicyclohexane-2-carboxylate (5) in  $\text{CDCl}_3$

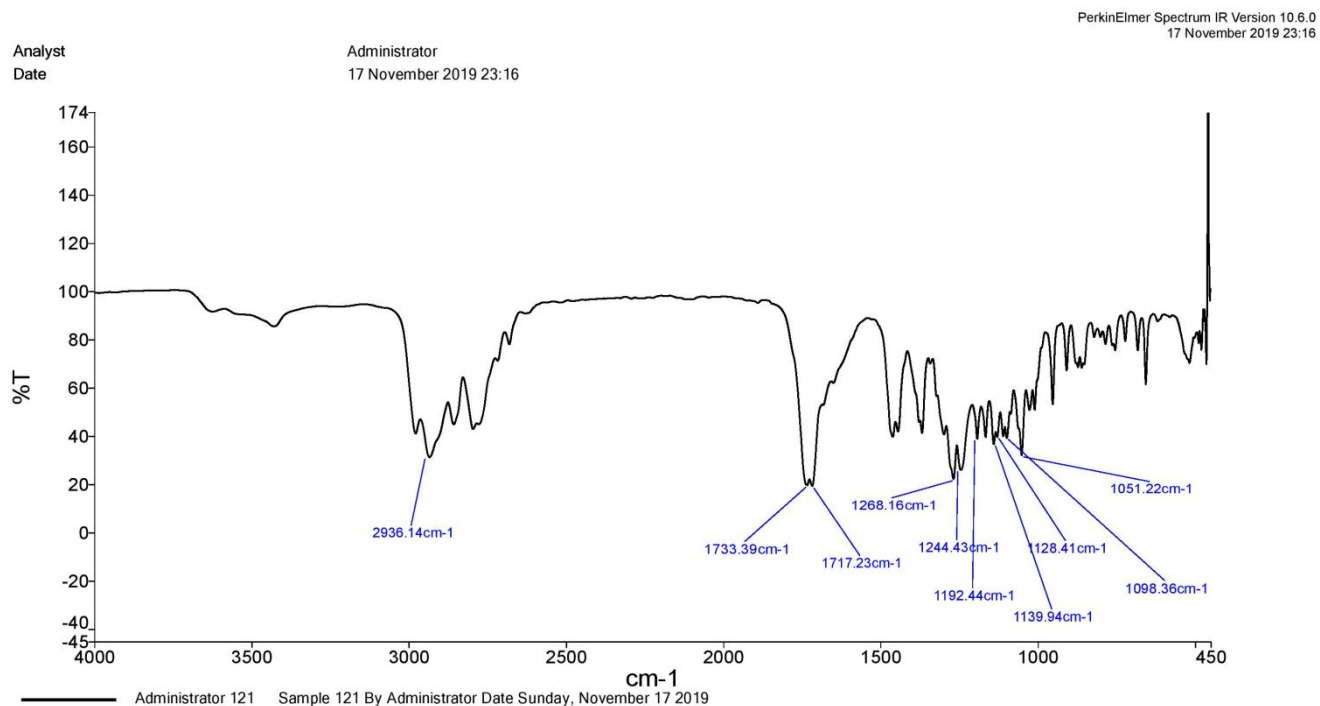

**Figure S76.** IR data of *N*-Me [3.3.1]azabicyclohexane-2-carboxylate (6)

## Walkup Analysis Report

|                               |                                             |                      |                        |
|-------------------------------|---------------------------------------------|----------------------|------------------------|
| <b>Data Filename</b>          | AQ-Methyl der._Pos_LoopInjection_MS_06840.d | <b>Sample Name</b>   | AQ-Methyl der.         |
| <b>Sample Type</b>            | Sample                                      | <b>Position</b>      | P1-A1                  |
| <b>Instrument Name</b>        | 6545 QToF                                   | <b>User Name</b>     | Ashraf Qasem           |
| <b>Acq Method</b>             | Pos_LoopInjection_MS.m                      | <b>Acquired Time</b> | 8/6/2019 6:25:43 PM    |
| <b>IRM Calibration Status</b> | Success                                     | <b>DA Method</b>     | Pos_LoopInjection_MS.m |

|                                  |           |                                  |                                                     |
|----------------------------------|-----------|----------------------------------|-----------------------------------------------------|
| <b>Sample Group</b>              |           | <b>Info.</b>                     |                                                     |
| <b>Walkup Sample Description</b> |           | <b>Walkup Method</b>             | Pos_LoopInjection_MS                                |
| <b>Formula</b>                   | C12H19NO3 | <b>Walkup Method Description</b> | Positive mode ionization using loop injection       |
| <b>Stream Name</b>               | LC 1      | <b>Acquisition SW Version</b>    | 6200 series TOF/6500 series Q-TOF B.09.00 (B9044.0) |

### User Chromatograms

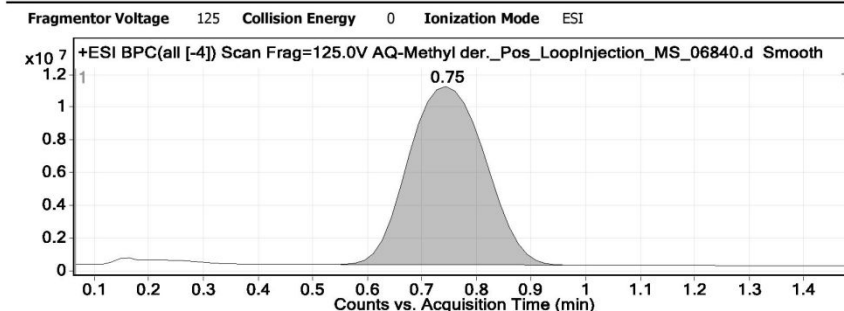

### Integration Peak List

| Peak | Start | RT   | End  | Height   | Area      | Area % |
|------|-------|------|------|----------|-----------|--------|
| 1    | 0.49  | 0.75 | 1.08 | 10530759 | 106650548 | 100    |

### User Spectra

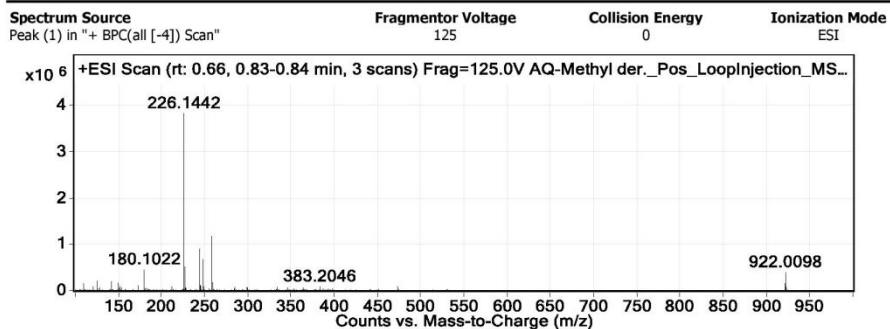

### Peak List

| m/z      | z | Abund     |
|----------|---|-----------|
| 125.9864 | 1 | 216205.68 |
| 141.9587 |   | 209535.34 |
| 180.1022 | 1 | 477595.58 |
| 226.1442 | 1 | 4117693.9 |
| 226.2041 |   | 238089.05 |
| 227.1478 | 1 | 521067.41 |
| 244.1548 | 1 | 898850.12 |
| 248.1261 | 1 | 680643.15 |

**Figure S77.** MS data of *N*-Me [3.3.1]azabicyclo (6) (part 1)



## Walkup Analysis Report

|          |   |            |
|----------|---|------------|
| 258.1703 | 1 | 1196526.36 |
| 922.0098 | 1 | 407661.15  |

### Compounds

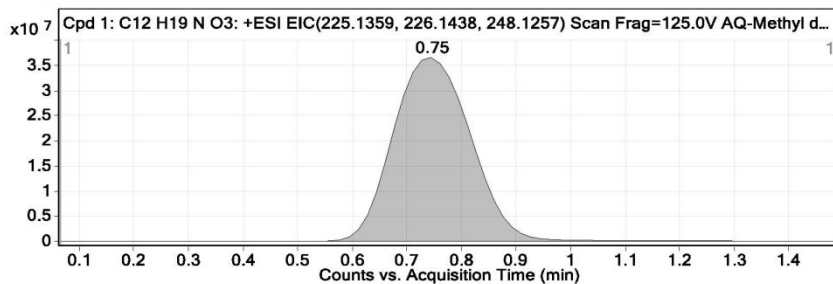

### Integration Peak List

| Start | RT   | End  | Height   | Area      |
|-------|------|------|----------|-----------|
| 0.49  | 0.75 | 1.47 | 35229636 | 362359831 |

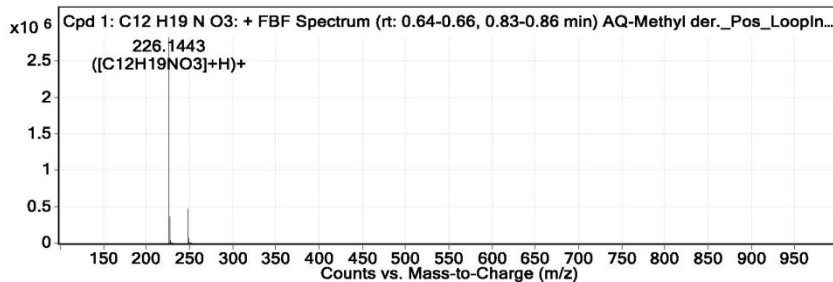

### Peak List

| m/z      | z | Abund     | Formula                                         | Ion                 |
|----------|---|-----------|-------------------------------------------------|---------------------|
| 226.1443 | 1 | 2824311.5 | C <sub>12</sub> H <sub>19</sub> NO <sub>3</sub> | (M+H) <sup>+</sup>  |
| 227.1478 | 1 | 358342.16 | C <sub>12</sub> H <sub>19</sub> NO <sub>3</sub> | (M+H) <sup>+</sup>  |
| 228.1498 | 1 | 37712.87  | C <sub>12</sub> H <sub>19</sub> NO <sub>3</sub> | (M+H) <sup>+</sup>  |
| 229.1501 | 1 | 5251.61   | C <sub>12</sub> H <sub>19</sub> NO <sub>3</sub> | (M+H) <sup>+</sup>  |
| 230.141  | 1 | 2468.59   | C <sub>12</sub> H <sub>19</sub> NO <sub>3</sub> | (M+H) <sup>+</sup>  |
| 248.1262 | 1 | 469635.25 | C <sub>12</sub> H <sub>19</sub> NO <sub>3</sub> | (M+Na) <sup>+</sup> |
| 249.1294 | 1 | 60601.92  | C <sub>12</sub> H <sub>19</sub> NO <sub>3</sub> | (M+Na) <sup>+</sup> |
| 250.1331 | 1 | 6829.82   | C <sub>12</sub> H <sub>19</sub> NO <sub>3</sub> | (M+Na) <sup>+</sup> |
| 251.1273 | 1 | 3046.43   | C <sub>12</sub> H <sub>19</sub> NO <sub>3</sub> | (M+Na) <sup>+</sup> |
| 252.1276 | 1 | 1597.46   | C <sub>12</sub> H <sub>19</sub> NO <sub>3</sub> | (M+Na) <sup>+</sup> |

--- End Of Report ---

**Figure S78.** MS data of *N*-Me [3.3.1]azabicyclo (**6**) (part 2)

# Walkup MS Report

|                               |                                             |                      |                        |
|-------------------------------|---------------------------------------------|----------------------|------------------------|
| <b>Data File</b>              | AQ-Methyl der._Pos_LoopInjection_MS_06840.d | <b>Sample Name</b>   | AQ-Methyl der.         |
| <b>Sample Type</b>            | Sample                                      | <b>Position</b>      | P1-A1                  |
| <b>Instrument Name</b>        | 6545 QTof                                   | <b>User Name</b>     | Ashraf Qasem           |
| <b>Acq Method</b>             | Pos_LoopInjection_MS.m                      | <b>Acquired Time</b> | 8/6/2019 6:25:43 PM    |
| <b>IRM Calibration Status</b> | Success                                     | <b>DA Method</b>     | Pos_LoopInjection_MS.m |
| <b>Comment</b>                |                                             |                      |                        |

|                                  |           |                                  |                                                     |
|----------------------------------|-----------|----------------------------------|-----------------------------------------------------|
| <b>Sample Group</b>              |           | <b>Info.</b>                     |                                                     |
| <b>Walkup Sample Description</b> |           | <b>Walkup Method</b>             | Pos_LoopInjection_MS                                |
| <b>Formula</b>                   | C12H19NO3 | <b>Walkup Method Description</b> | Positive mode ionization using loop injection       |
| <b>Stream Name</b>               | LC 1      | <b>Acquisition SW Version</b>    | 6200 series TOF/6500 series Q-TOF B.09.00 (B9044.0) |

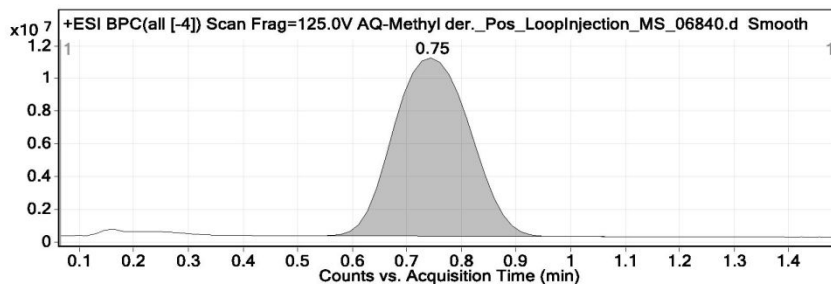

Figure 1: Base peak chromatogram

### User Chromatogram Peak List

| RT (min) | Area      | Area % | Area Sum (%) | Base Peak (m/z) | Width (min) |
|----------|-----------|--------|--------------|-----------------|-------------|
| 0.75     | 106650548 | 100.00 | 100.00       | 226.1442        | 0.180       |

### Compound Table

| Compound Label      | RT (min) | Observed mass (m/z) | Neutral observed mass (Da) | Theoretical mass (Da) | Mass error (ppm) | Isotope match score (%) |
|---------------------|----------|---------------------|----------------------------|-----------------------|------------------|-------------------------|
| Cpd 1: C12 H19 N O3 | 0.75     | 248.1262            | 225.1370                   | 225.1365              | 2.18             | 99.26                   |

Mass errors of between -5.00 and 5.00 ppm with isotope match scores above 60% are considered confirmation of molecular formulae

# Walkup MS Report

## Compound specific information

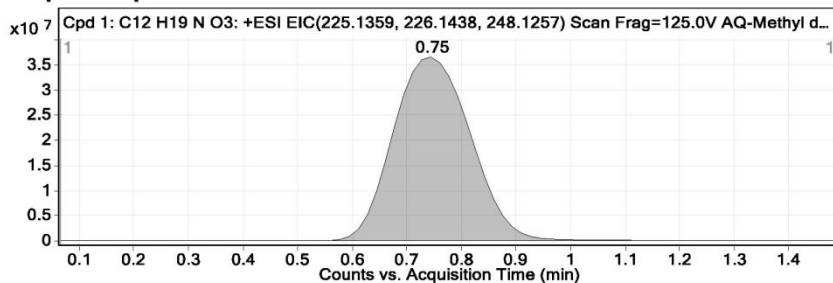

Figure: Extracted ion chromatogram (EIC) of compound.

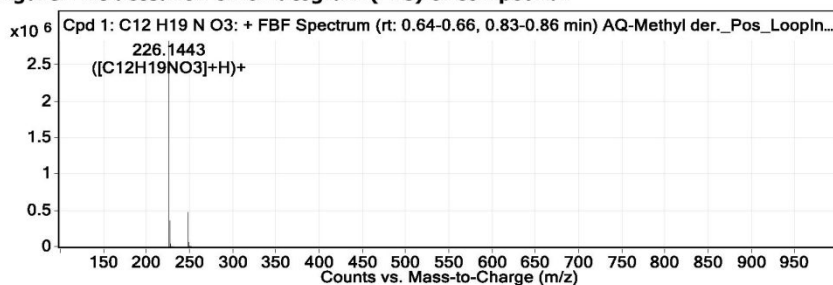

Figure: Full range view of Compound spectra and potential adducts.

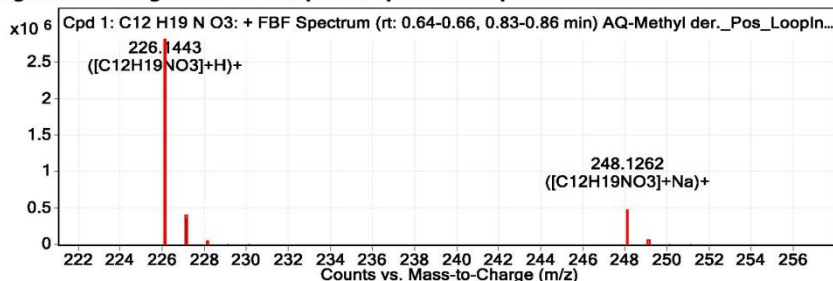

Figure: Zoomed Compound spectra view  
(red boxes indicating expected theoretical isotope spacing and abundance)

### Compound isotope peak List

| m/z      | z | Abund     | Formula                                         | Ion                 |
|----------|---|-----------|-------------------------------------------------|---------------------|
| 226.1443 | 1 | 2824311.5 | C <sub>12</sub> H <sub>19</sub> NO <sub>3</sub> | (M+H) <sup>+</sup>  |
| 227.1478 | 1 | 358342.2  | C <sub>12</sub> H <sub>19</sub> NO <sub>3</sub> | (M+H) <sup>+</sup>  |
| 228.1498 | 1 | 37712.9   | C <sub>12</sub> H <sub>19</sub> NO <sub>3</sub> | (M+H) <sup>+</sup>  |
| 229.1501 | 1 | 5251.6    | C <sub>12</sub> H <sub>19</sub> NO <sub>3</sub> | (M+H) <sup>+</sup>  |
| 230.1410 | 1 | 2468.6    | C <sub>12</sub> H <sub>19</sub> NO <sub>3</sub> | (M+H) <sup>+</sup>  |
| 248.1262 | 1 | 469635.3  | C <sub>12</sub> H <sub>19</sub> NO <sub>3</sub> | (M+Na) <sup>+</sup> |
| 249.1294 | 1 | 60601.9   | C <sub>12</sub> H <sub>19</sub> NO <sub>3</sub> | (M+Na) <sup>+</sup> |
| 250.1331 | 1 | 6829.8    | C <sub>12</sub> H <sub>19</sub> NO <sub>3</sub> | (M+Na) <sup>+</sup> |
| 251.1273 | 1 | 3046.4    | C <sub>12</sub> H <sub>19</sub> NO <sub>3</sub> | (M+Na) <sup>+</sup> |
| 252.1276 | 1 | 1597.5    | C <sub>12</sub> H <sub>19</sub> NO <sub>3</sub> | (M+Na) <sup>+</sup> |

--- End Of Report ---

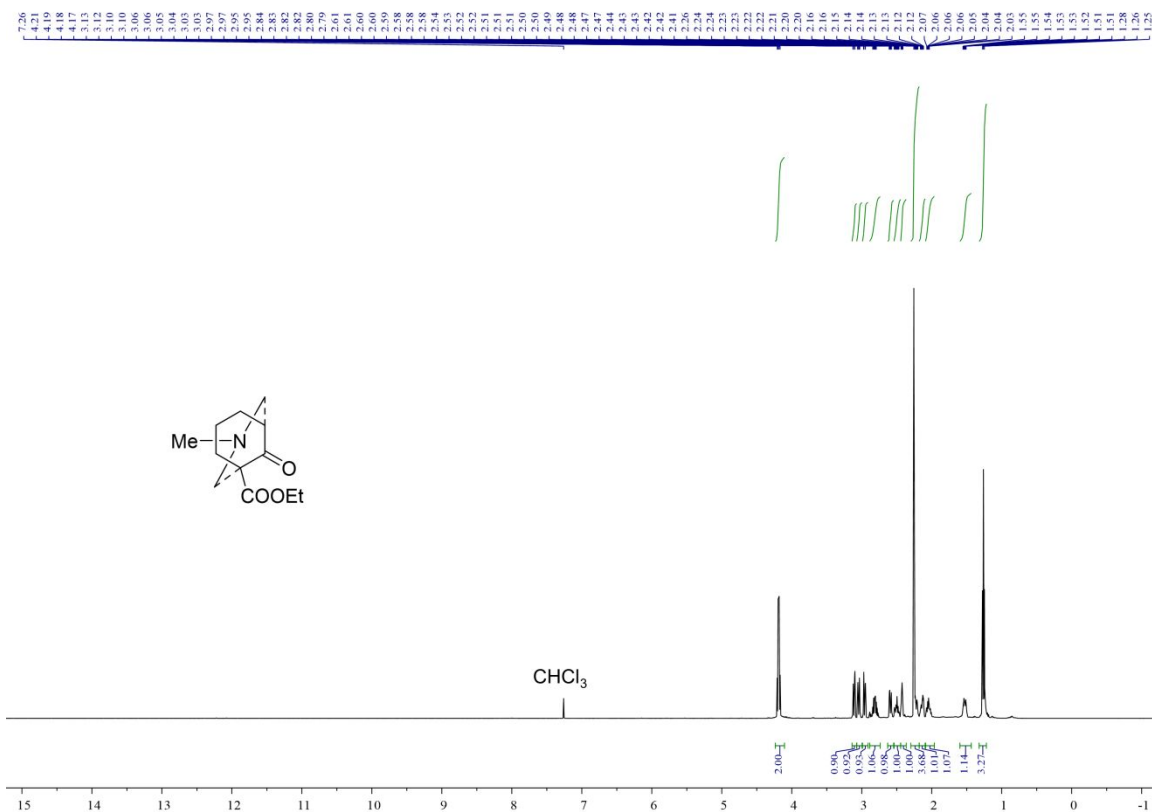

**Figure S81.**  $^1\text{H}$  NMR spectrum of *N*-Me [3.3.1]azabicyclohexane-2-carboxylic acid ethyl ester (**6**) in  $\text{CDCl}_3$

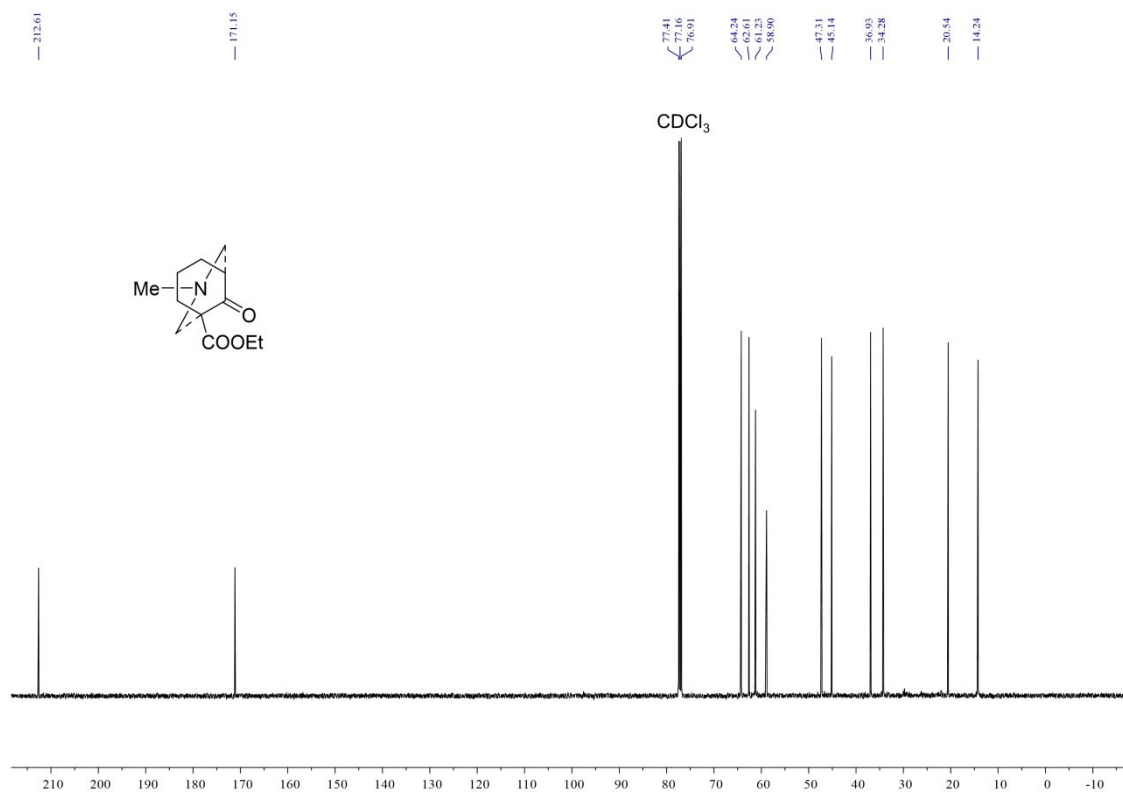

**Figure S82.**  $^{13}\text{C}$  NMR spectrum of *N*-Me [3.3.1]azabicyclohexane-2-carboxylic acid ethyl ester (**6**) in  $\text{CDCl}_3$

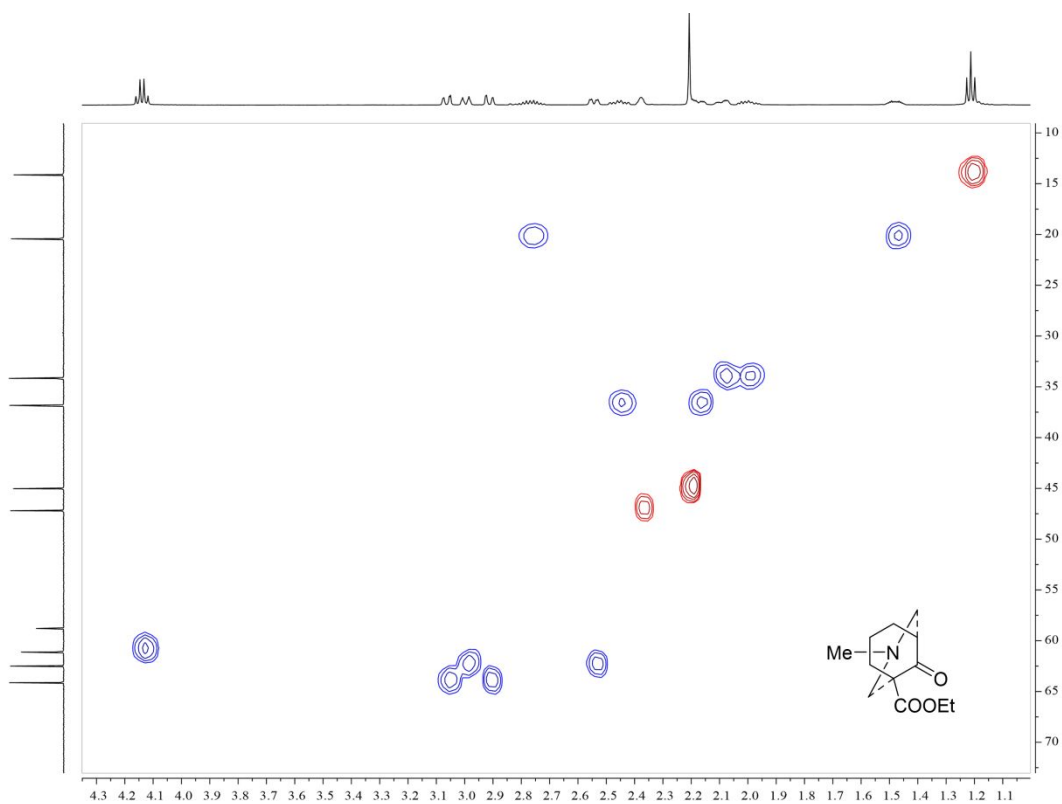

**Figure S83.** HSQC spectrum of *N*-Me [3.3.1]azabicyclohexane-2-carboxylic acid ethyl ester (**6**) in CDCl<sub>3</sub>

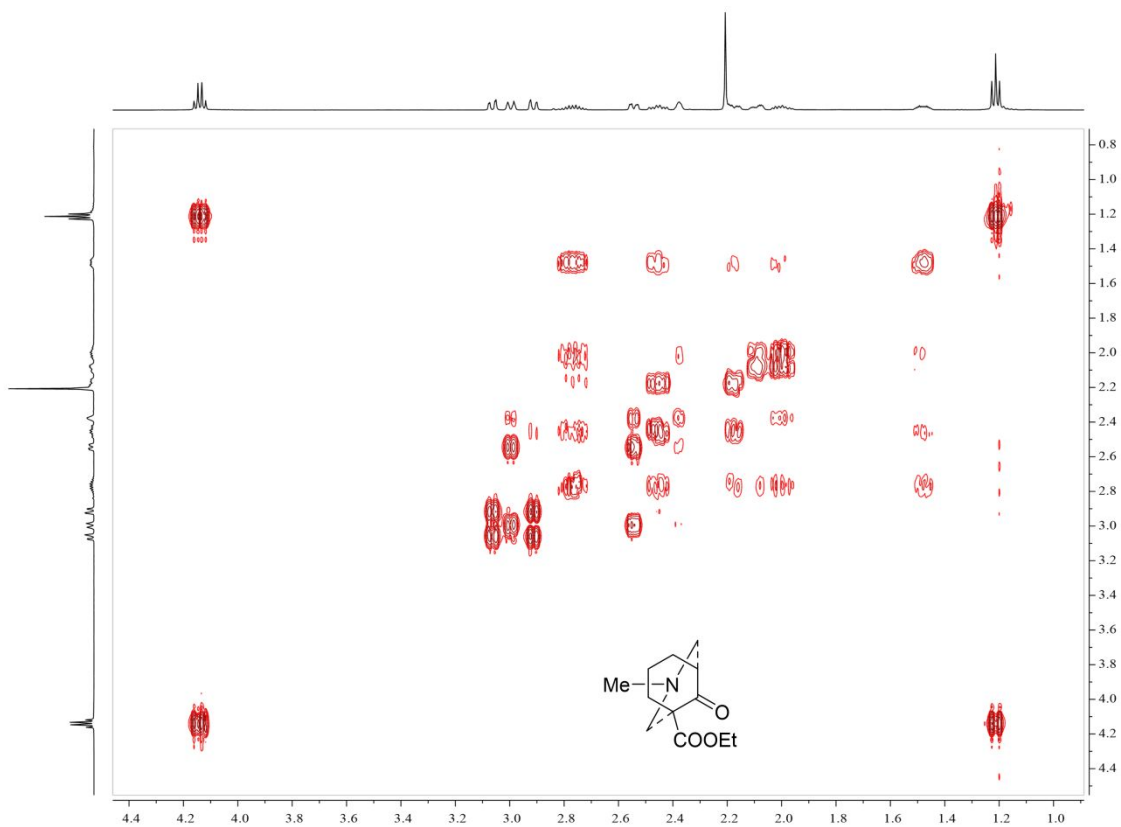

**Figure S84.** COSY spectrum of *N*-Me [3.3.1]azabicyclohexane-2-carboxylic acid ethyl ester (**6**) in CDCl<sub>3</sub>

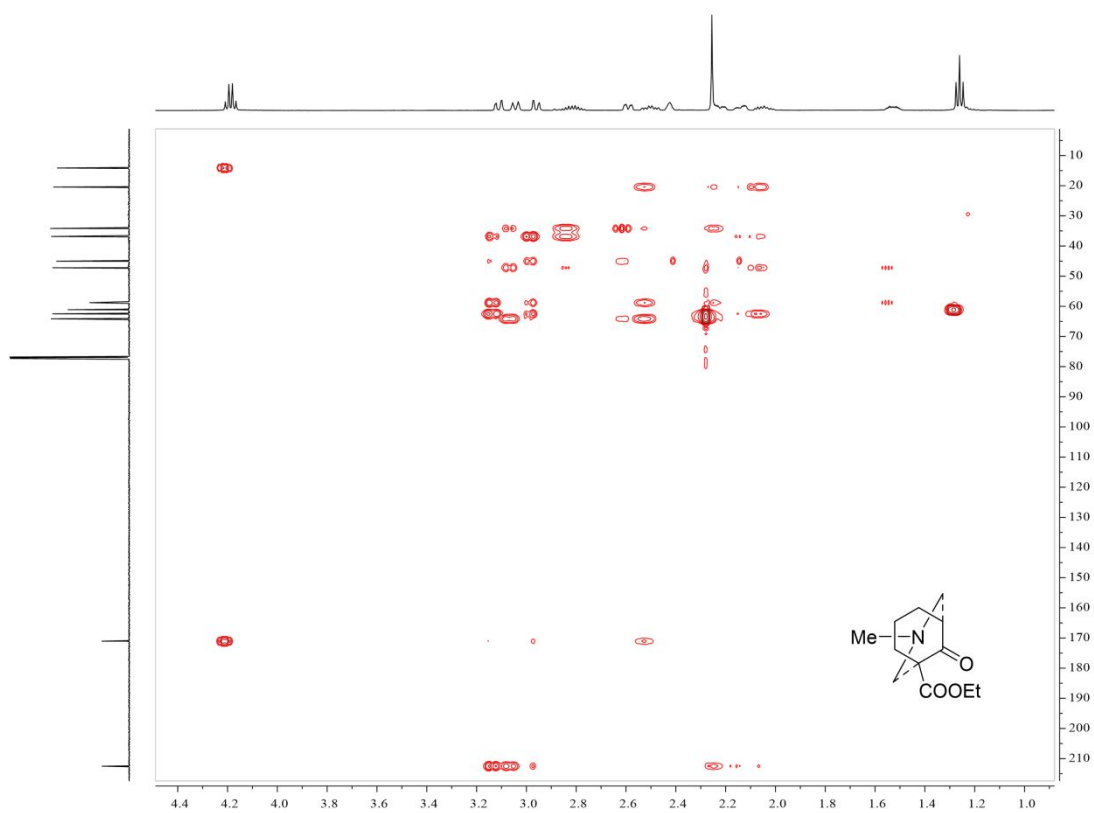

**Figure S85.** HMBC spectrum of *N*-Me [3.3.1]azabicyclohexane-2-carboxylic acid ethyl ester (6) in CDCl<sub>3</sub>

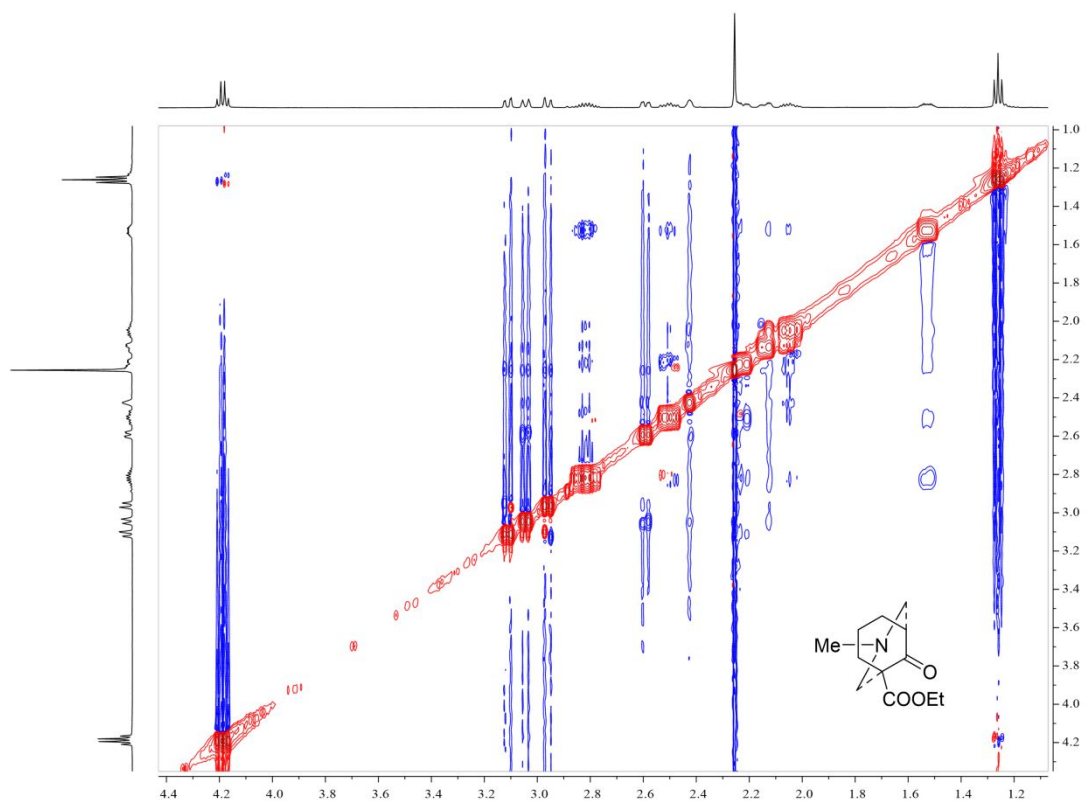

**Figure S86.** NOESY spectrum of *N*-Me [3.3.1]azabicyclohexane-2-carboxylic acid ethyl ester (6) in CDCl<sub>3</sub>

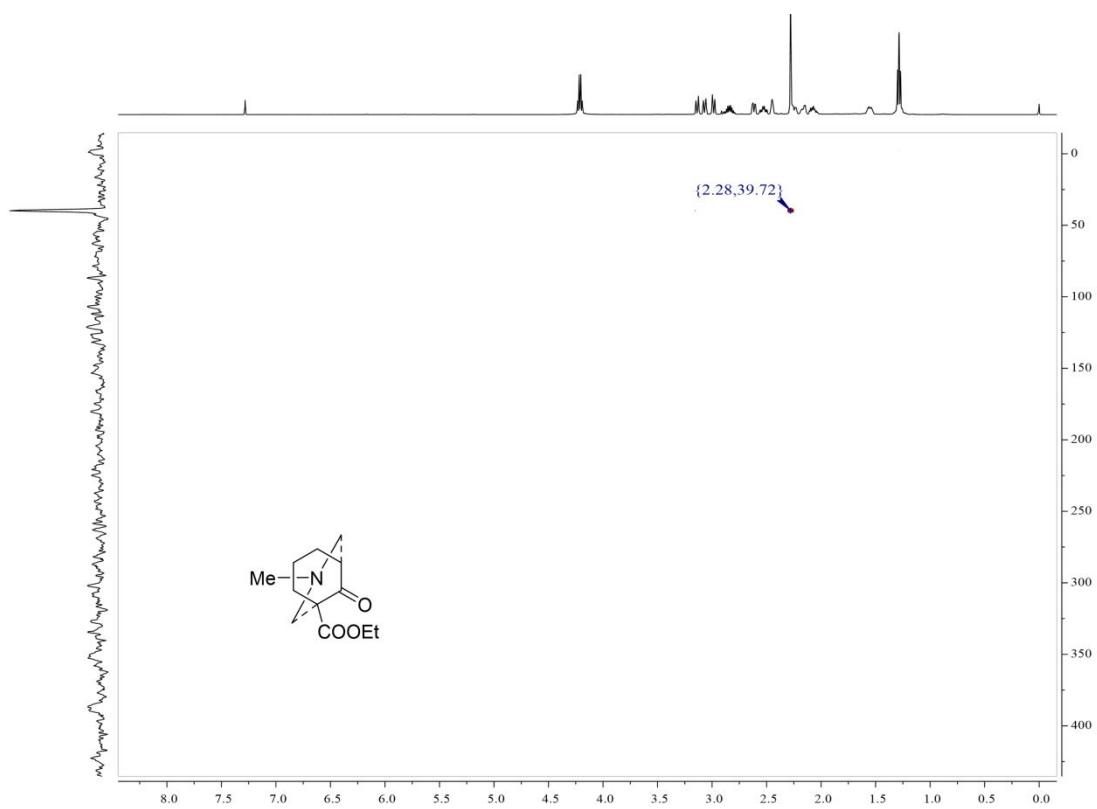

**Figure S87.**  $^1\text{H}$ - $^{15}\text{N}$  HMBC spectrum of *N*-Me [3.3.1]azabicyclohexane-2-carboxylate (6) in  $\text{CDCl}_3$

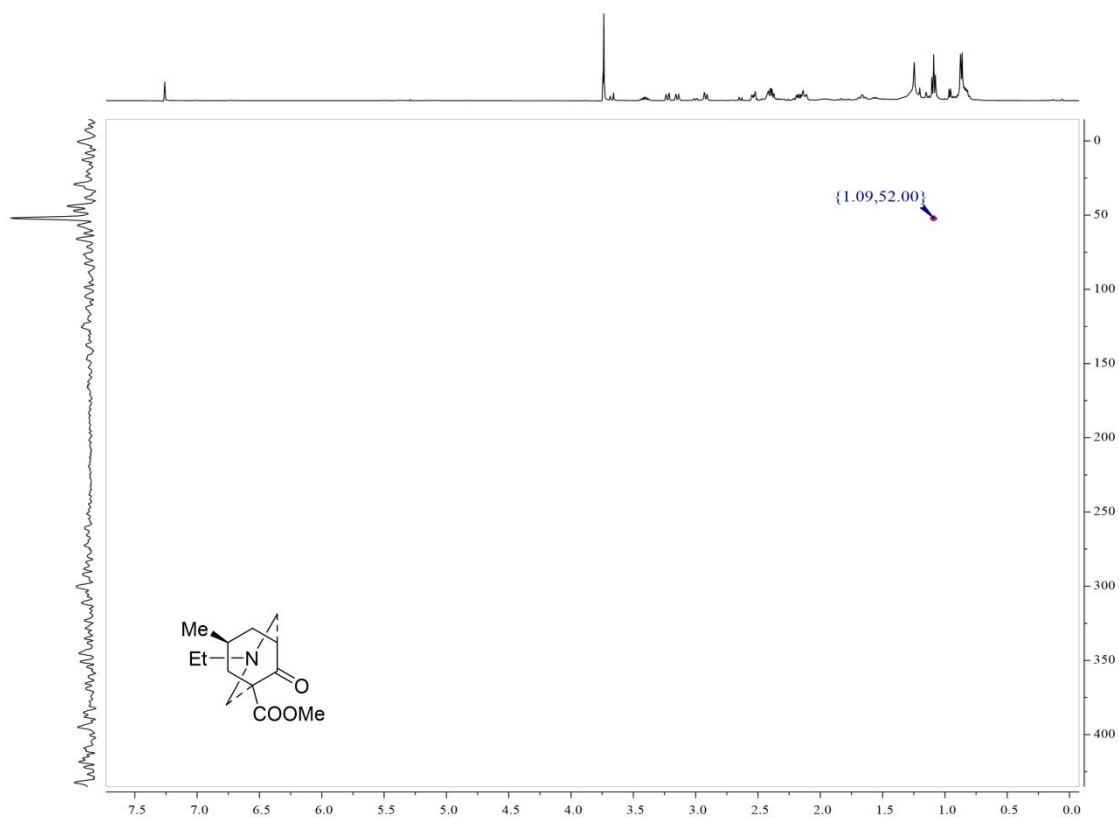

**Figure S88.**  $^1\text{H}$ - $^{15}\text{N}$  HMBC spectrum of 7-Me [3.3.1]azabicyclohexane-2-carboxylate (7) in  $\text{CDCl}_3$

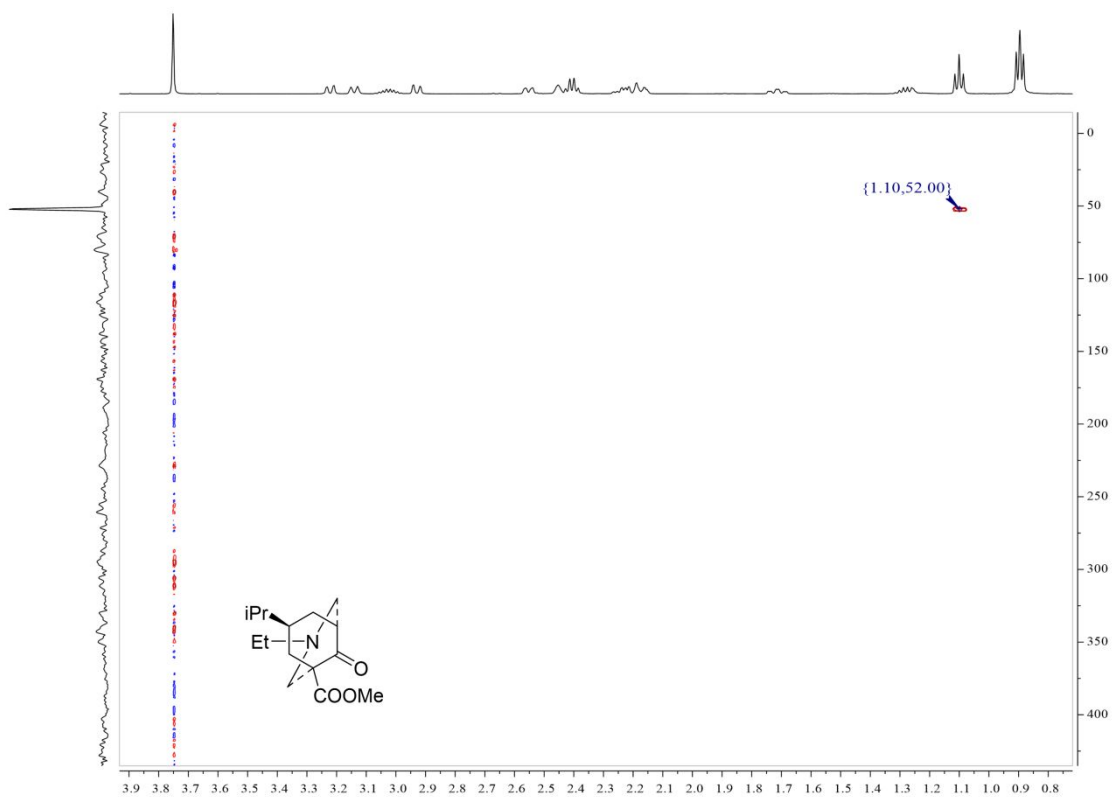

**Figure S89.**  $^1\text{H}$ - $^{15}\text{N}$  HMBC spectrum of 7-iPr [3.3.1]azabicyclic (**8**) in  $\text{CDCl}_3$

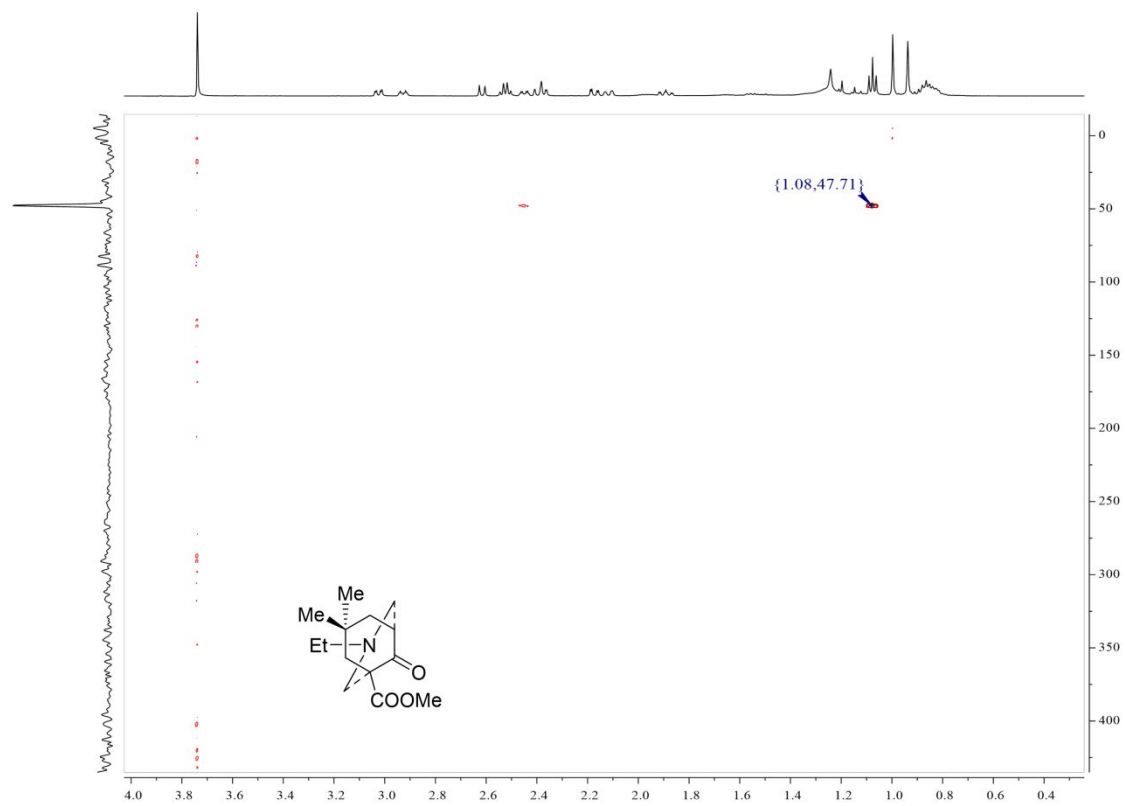

**Figure S90.**  $^1\text{H}$ - $^{15}\text{N}$  HMBC spectrum of 7,7-diMe [3.3.1]azabicyclic (**9**) in  $\text{CDCl}_3$



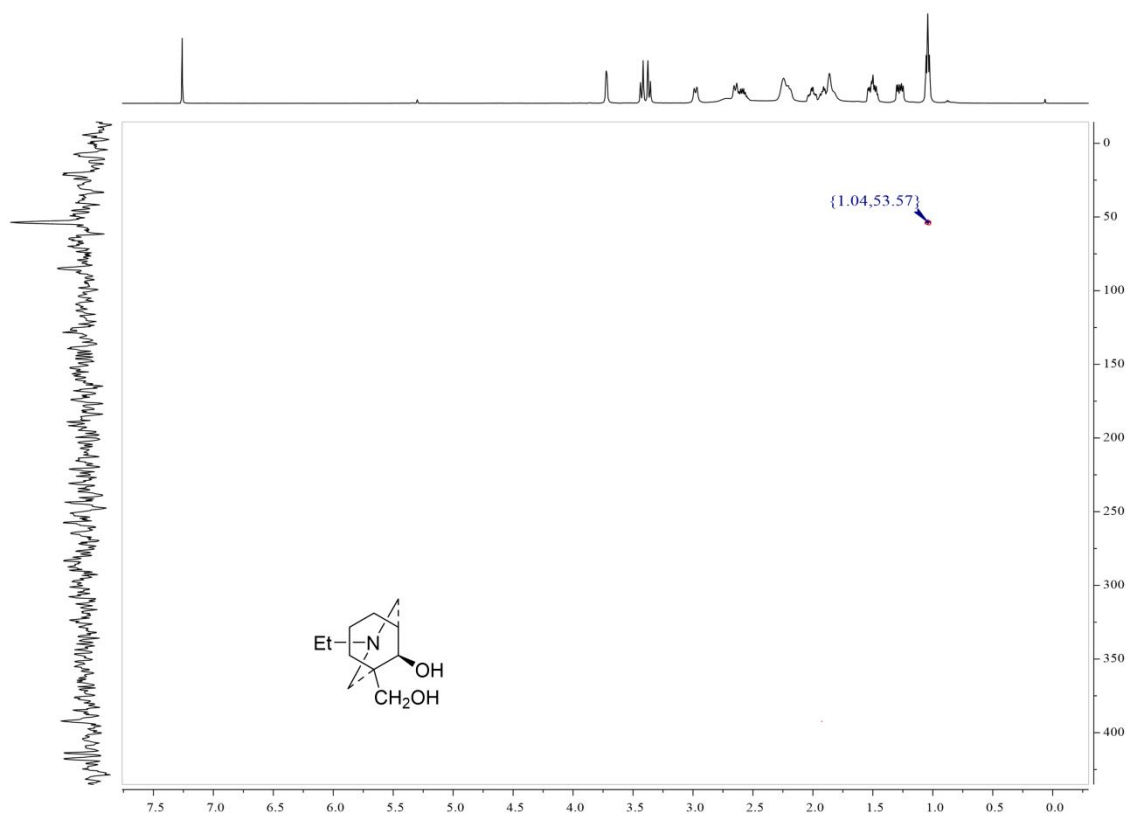

**Figure S91.**  $^1\text{H}$ - $^{15}\text{N}$  HMBC spectrum of diol (**10**) in  $\text{CDCl}_3$

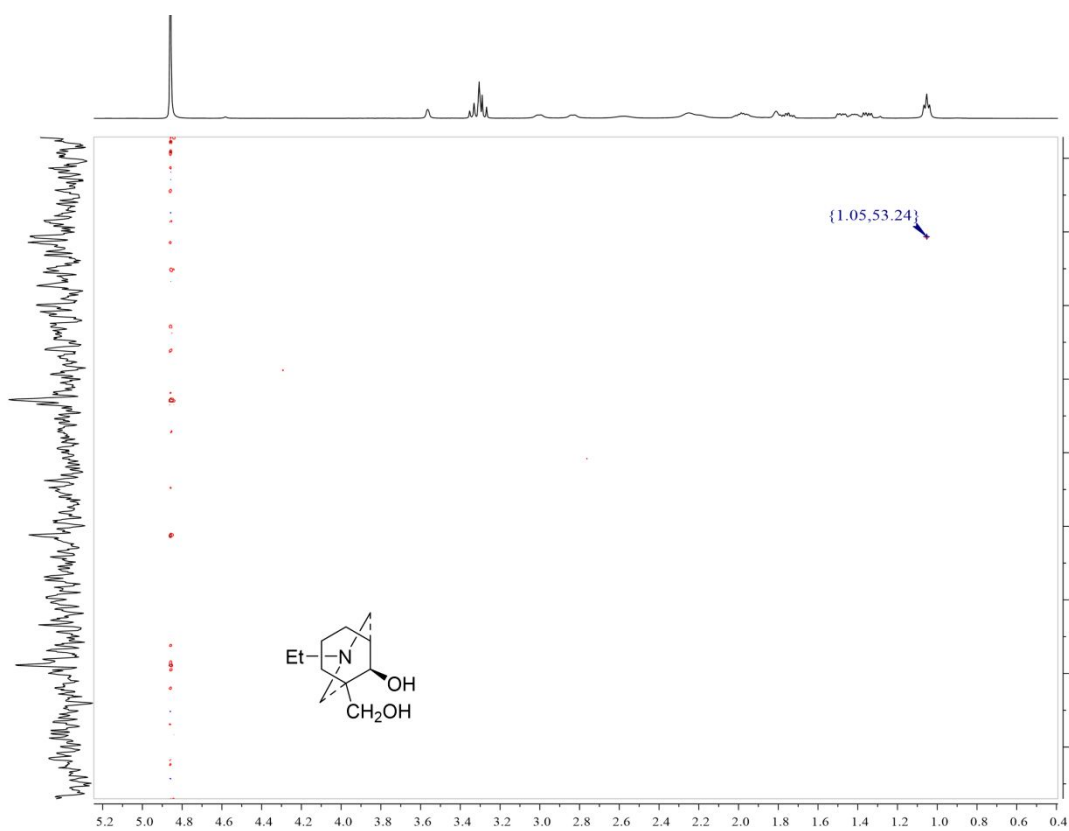

**Figure S92.**  $^1\text{H}$ - $^{15}\text{N}$  HMBC spectrum of diol (**10**) in  $\text{CD}_3\text{OD}$

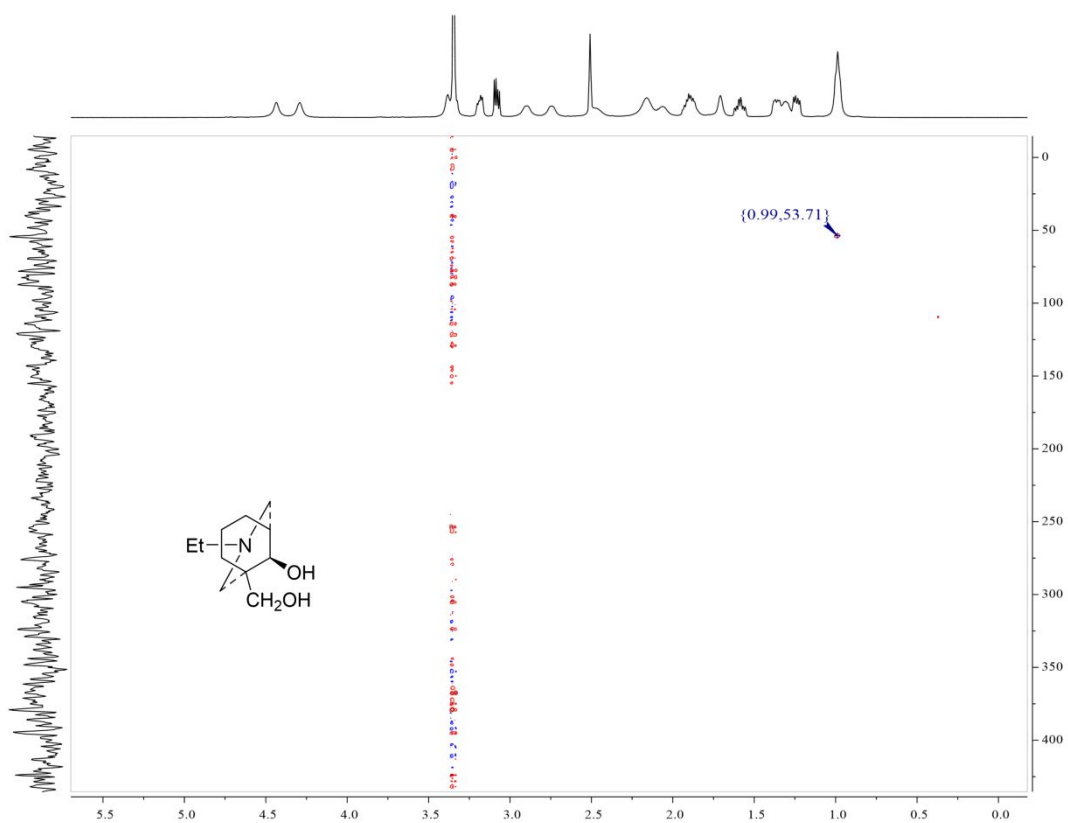

Figure S93.  $^1\text{H}$ - $^{15}\text{N}$  HMBC spectrum of diol (10) in  $d_6$ -DMSO

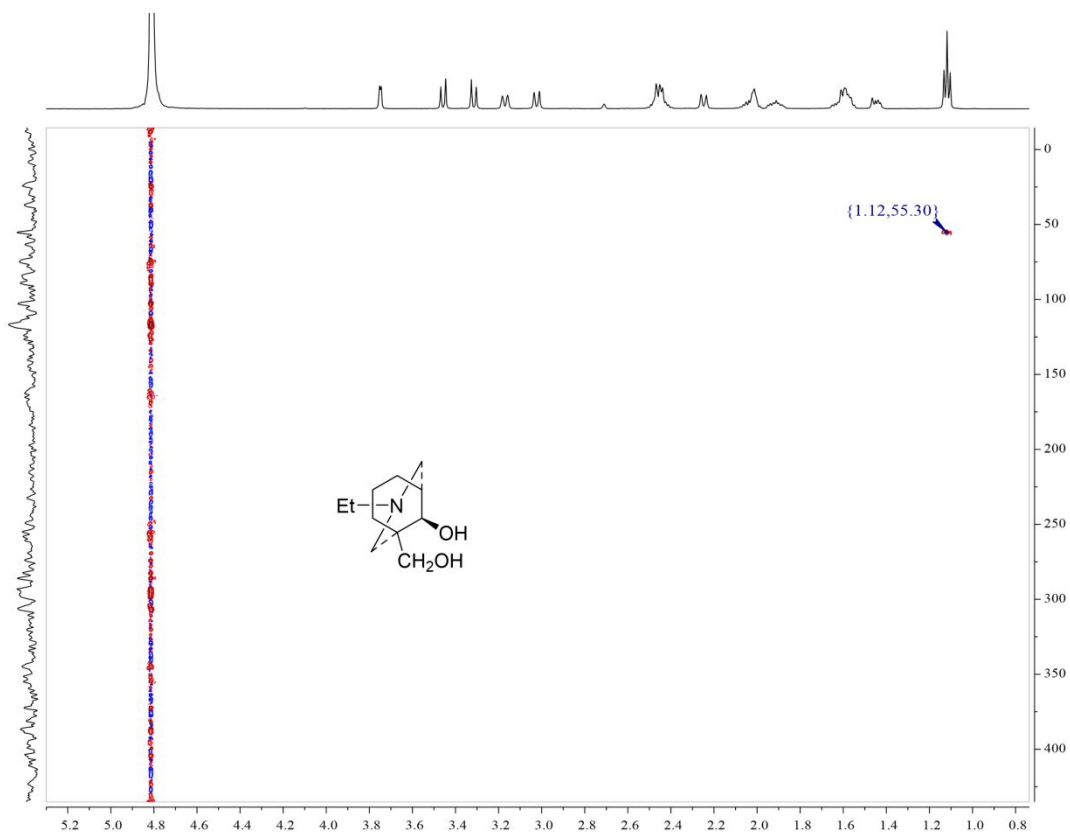

Figure S94.  $^1\text{H}$ - $^{15}\text{N}$  HMBC spectrum of diol (10) in  $\text{D}_2\text{O}$  (with additional 2 drops of  $d_6$ -DMSO)

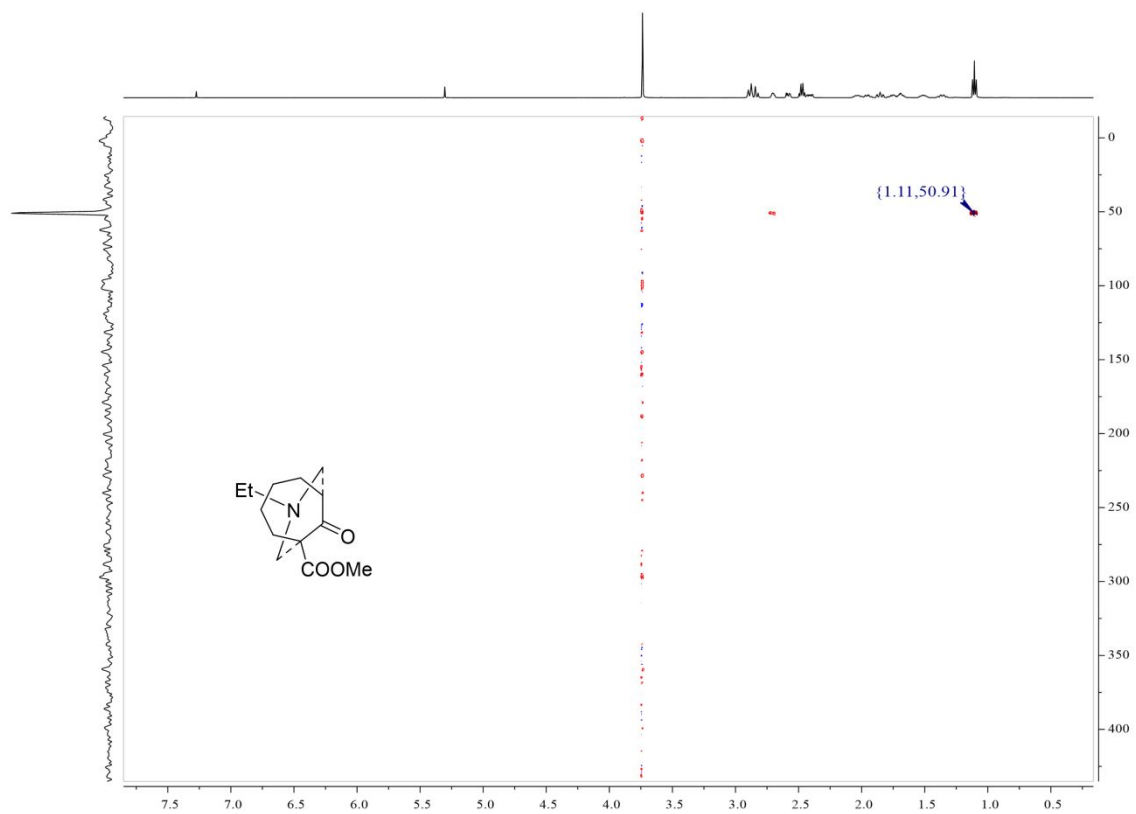

**Figure S95.**  $^1\text{H}$ - $^{15}\text{N}$  HMBC spectrum of [4.3.1]azabicyclic (11) in  $\text{CDCl}_3$

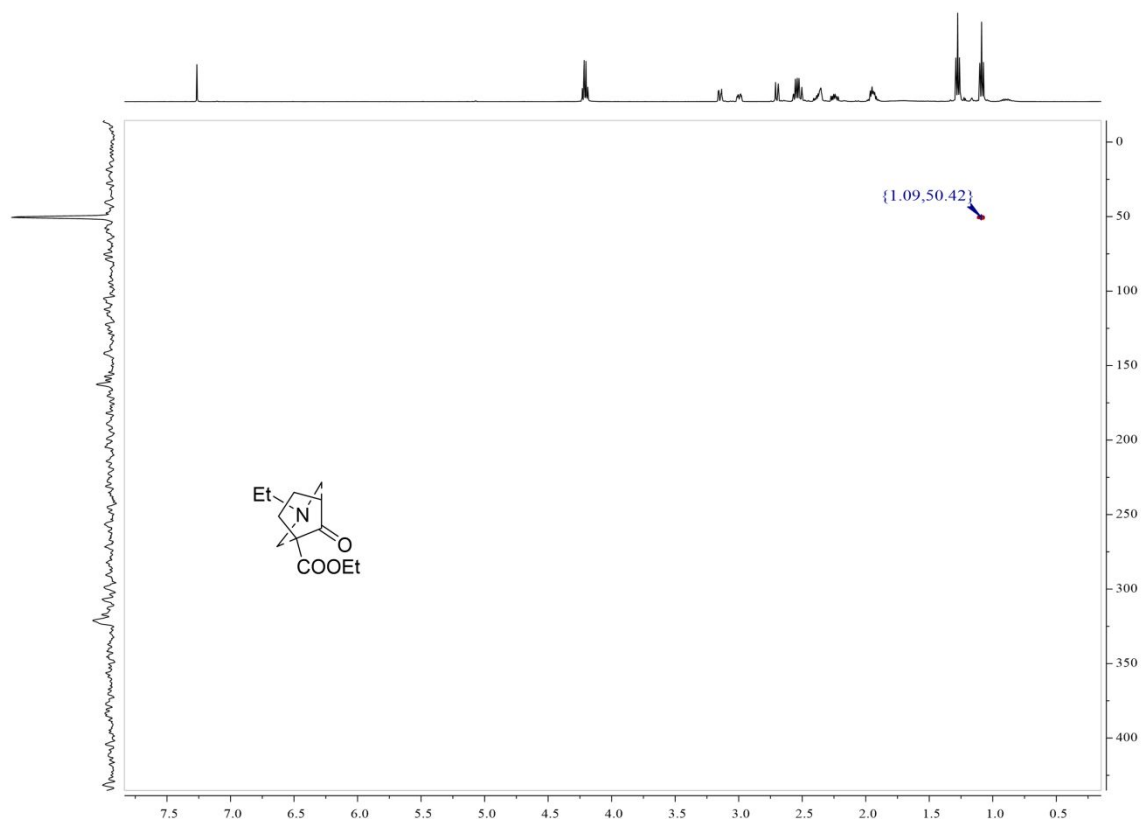

**Figure S96.**  $^1\text{H}$ - $^{15}\text{N}$  HMBC spectrum of [3.2.1]azabicyclic (12) in  $\text{CDCl}_3$

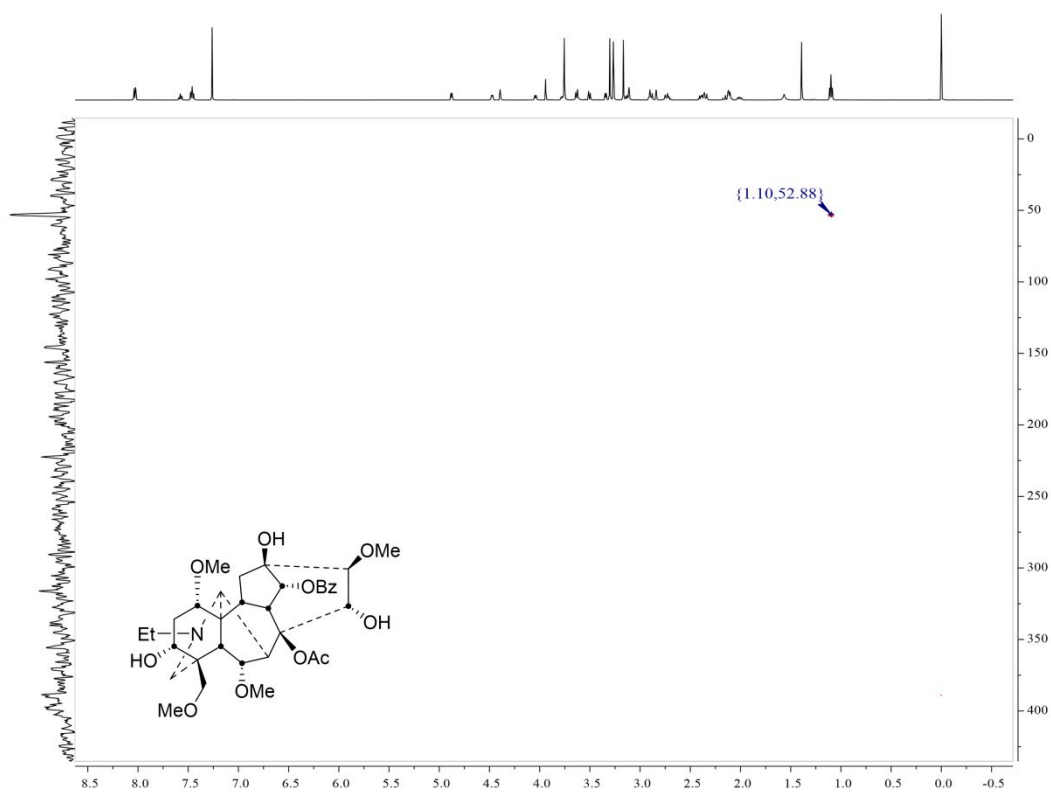

**Figure S97.**  $^1\text{H}$ - $^{15}\text{N}$  HMBC spectrum of aconitine (**13**) in  $\text{CDCl}_3$

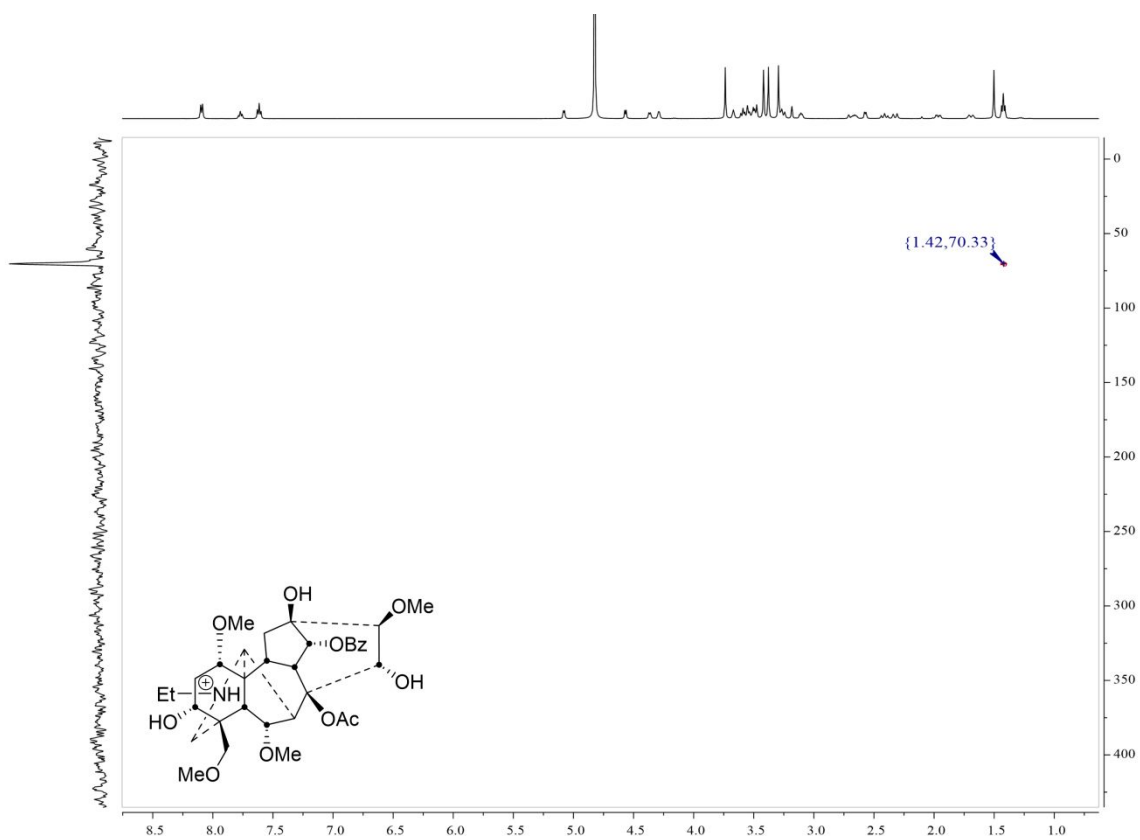

**Figure S98.**  $^1\text{H}$ - $^{15}\text{N}$  HMBC spectrum of aconitine HCl salt (**13'**) in  $\text{D}_2\text{O}$  (with additional 2 drops of  $d_6$ -DMSO)

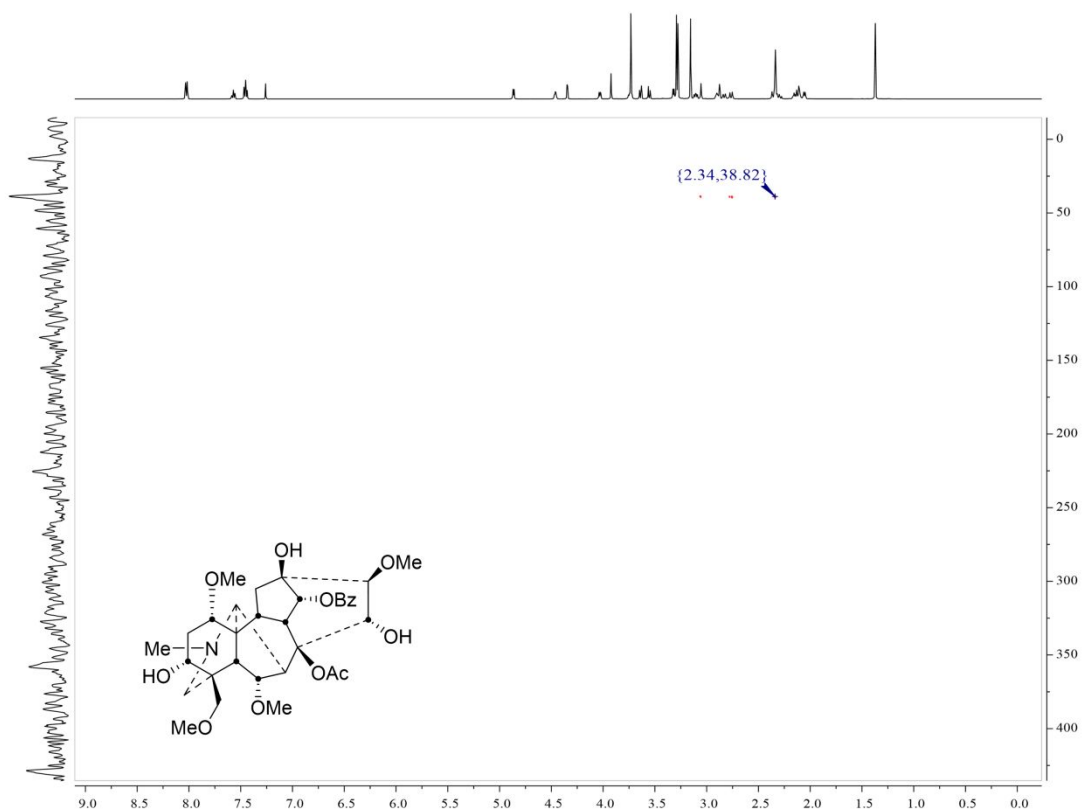

**Figure S99.**  $^1\text{H}$ - $^{15}\text{N}$  HMBC spectrum of mesaconitine (**14**) in  $\text{CDCl}_3$

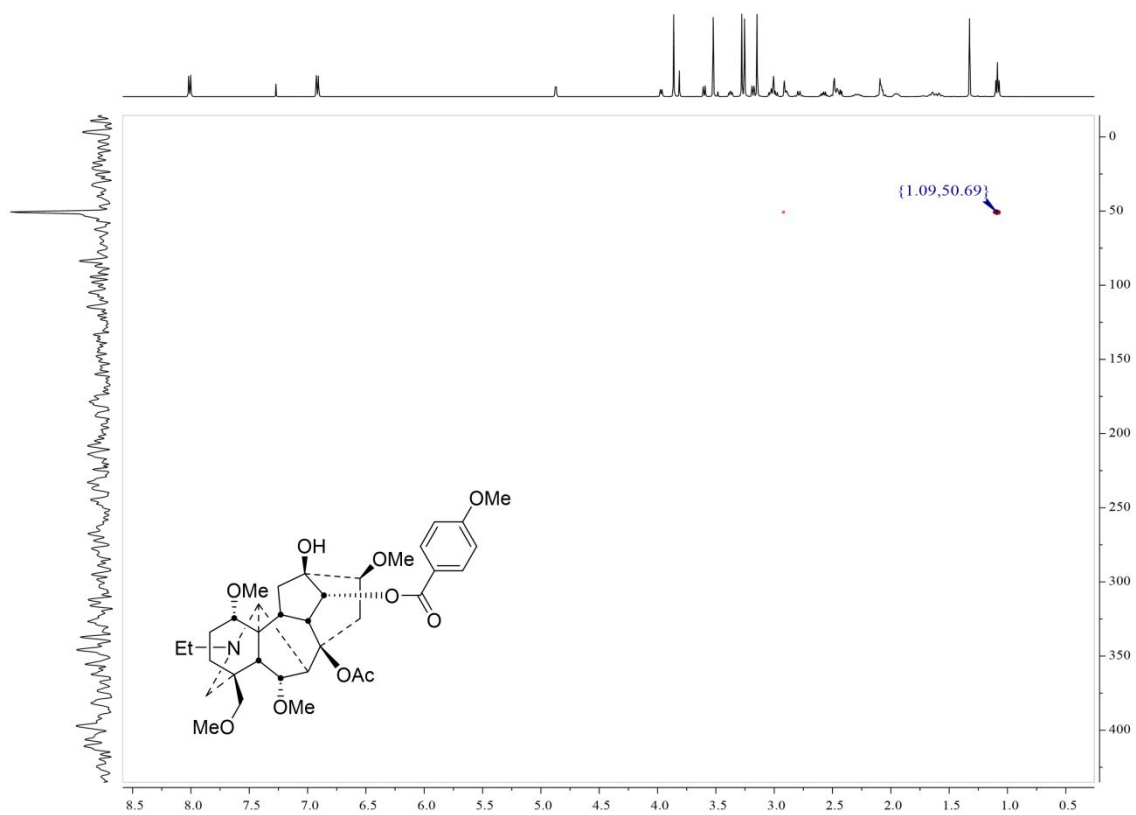

**Figure S100.**  $^1\text{H}$ - $^{15}\text{N}$  HMBC spectrum of crassicauline A (**15**) in  $\text{CDCl}_3$

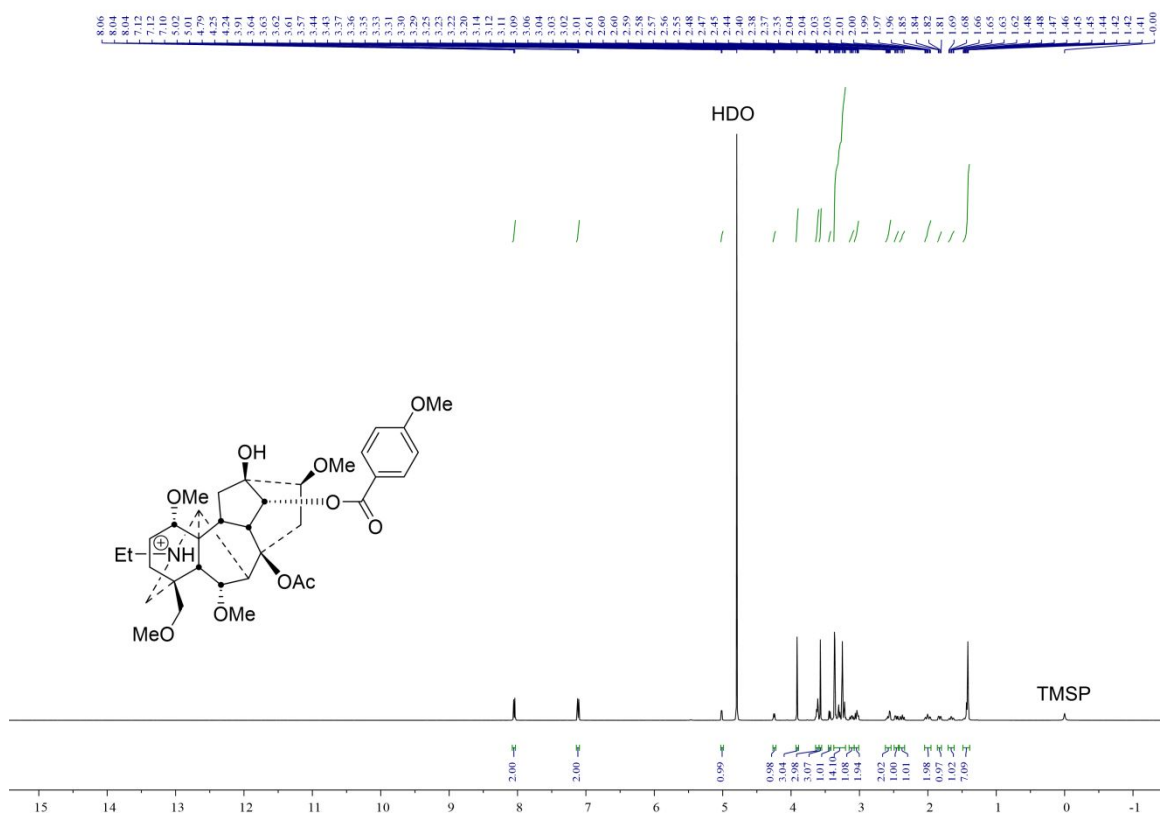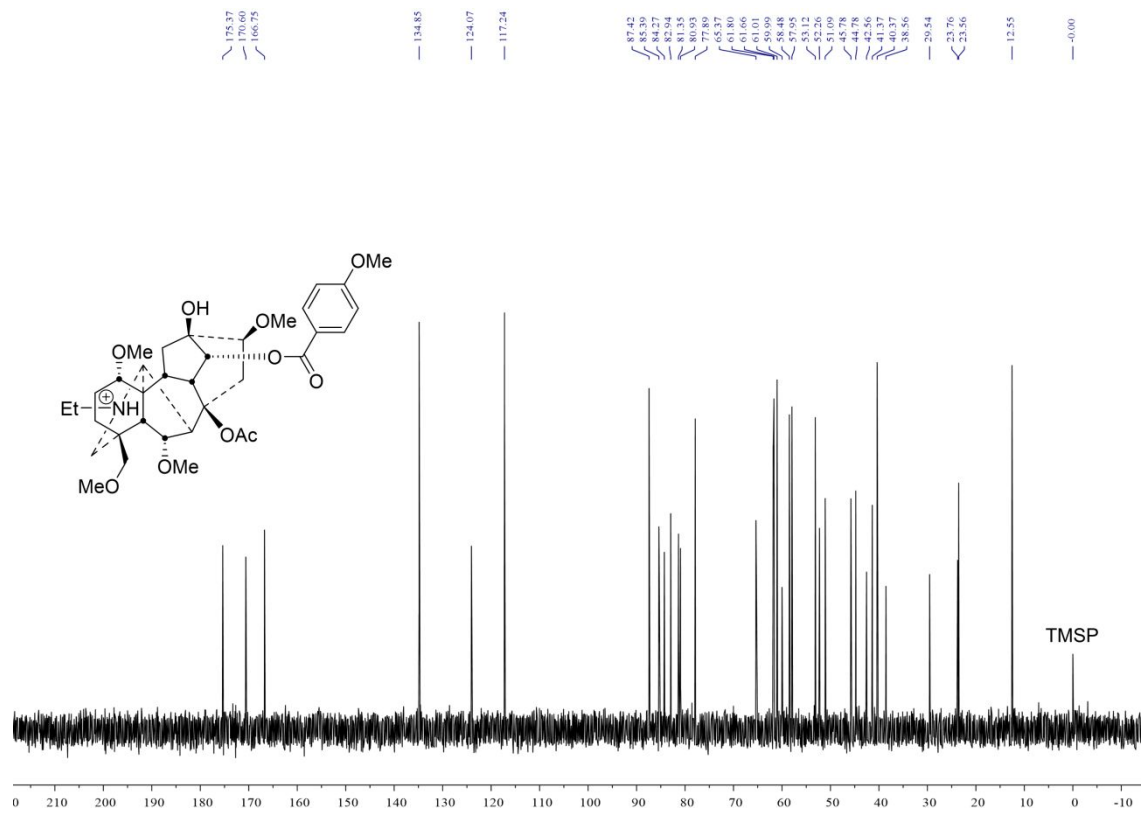

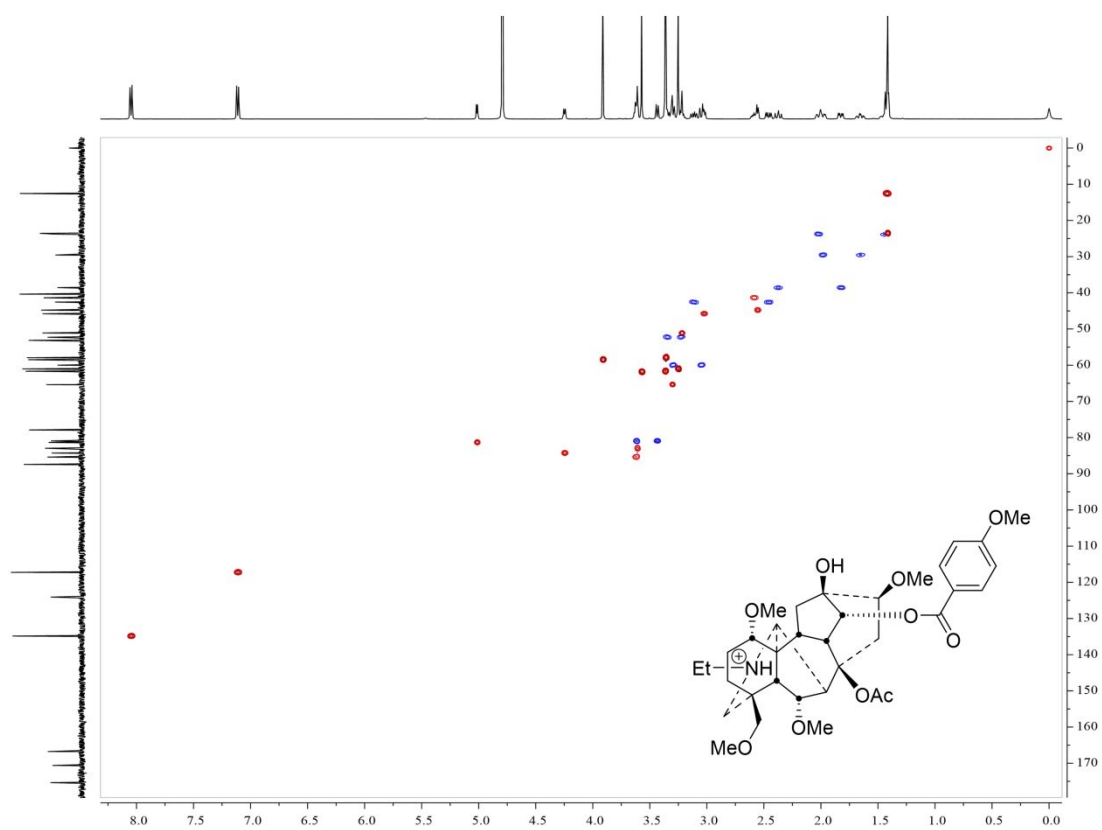

**Figure S103.** HSQC spectrum of crassicauline A HCl salt (**15'**) in  $\text{D}_2\text{O}$

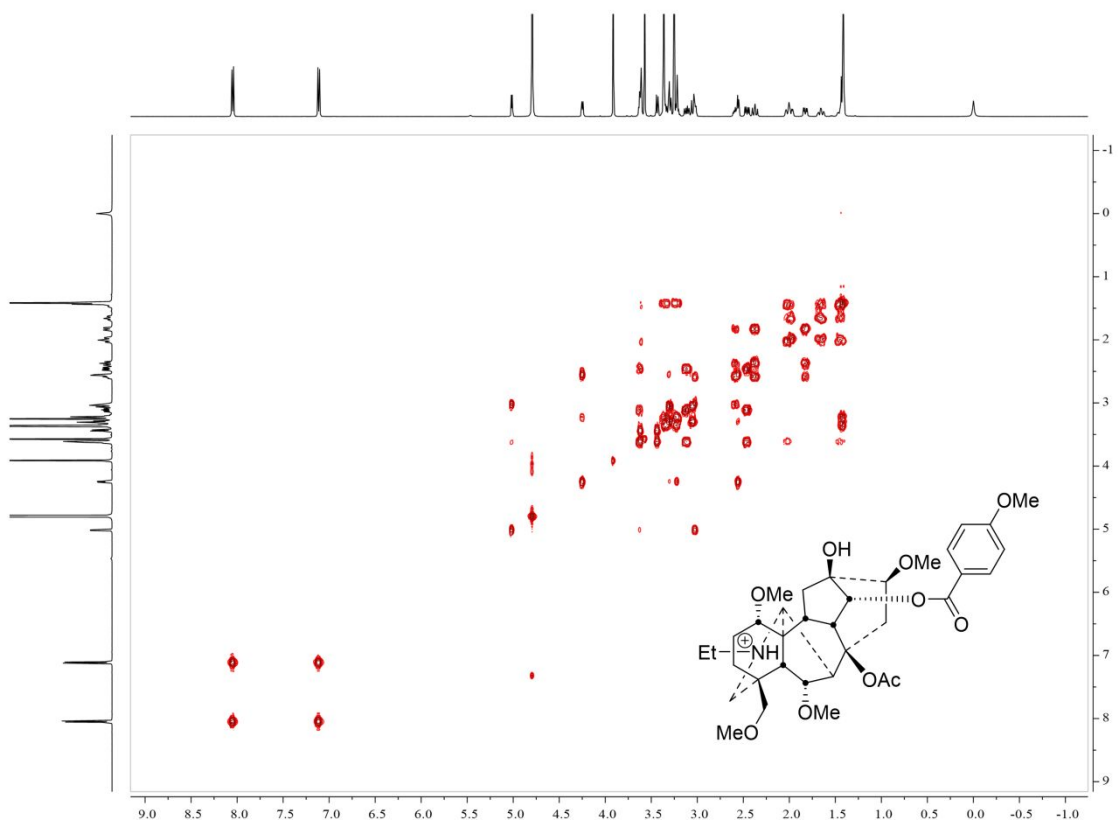

**Figure S104.** COSY spectrum of crassicauline A HCl salt (**15'**) in  $\text{D}_2\text{O}$

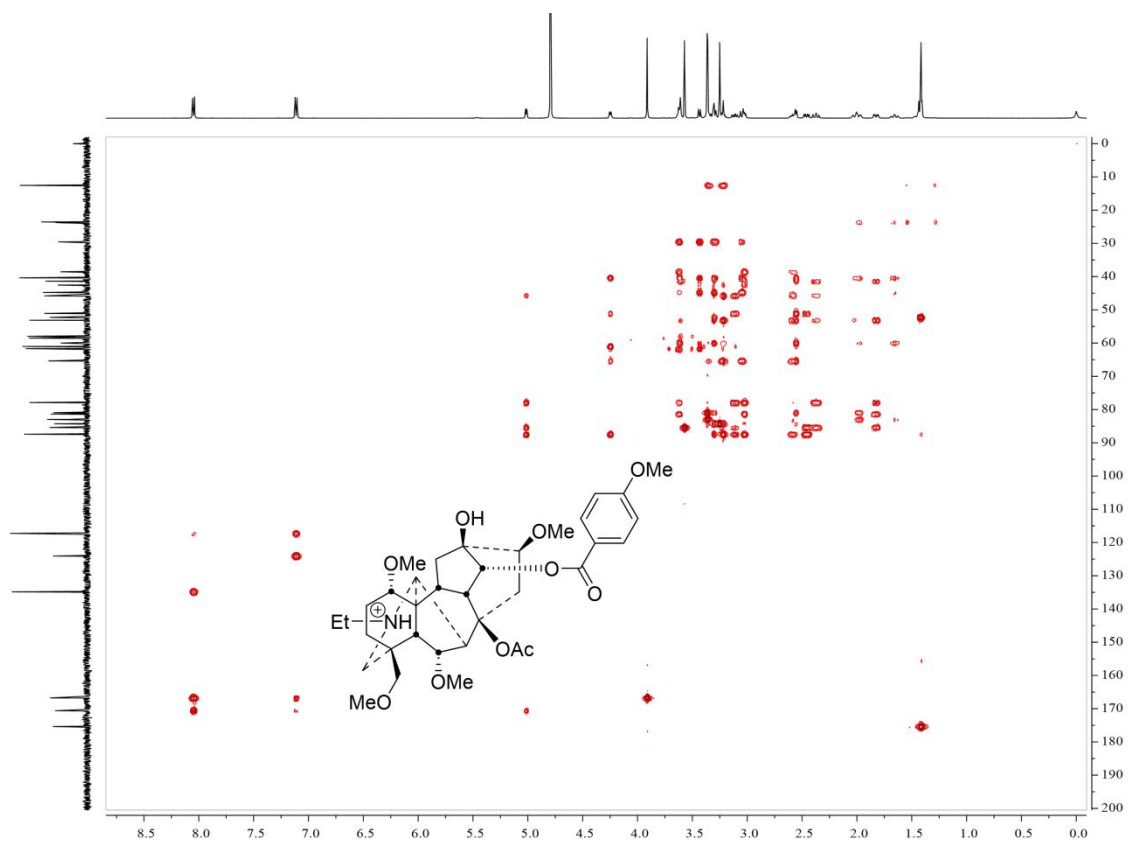

**Figure S105.** HMBC spectrum of crassicauline A HCl salt (**15'**) in D<sub>2</sub>O

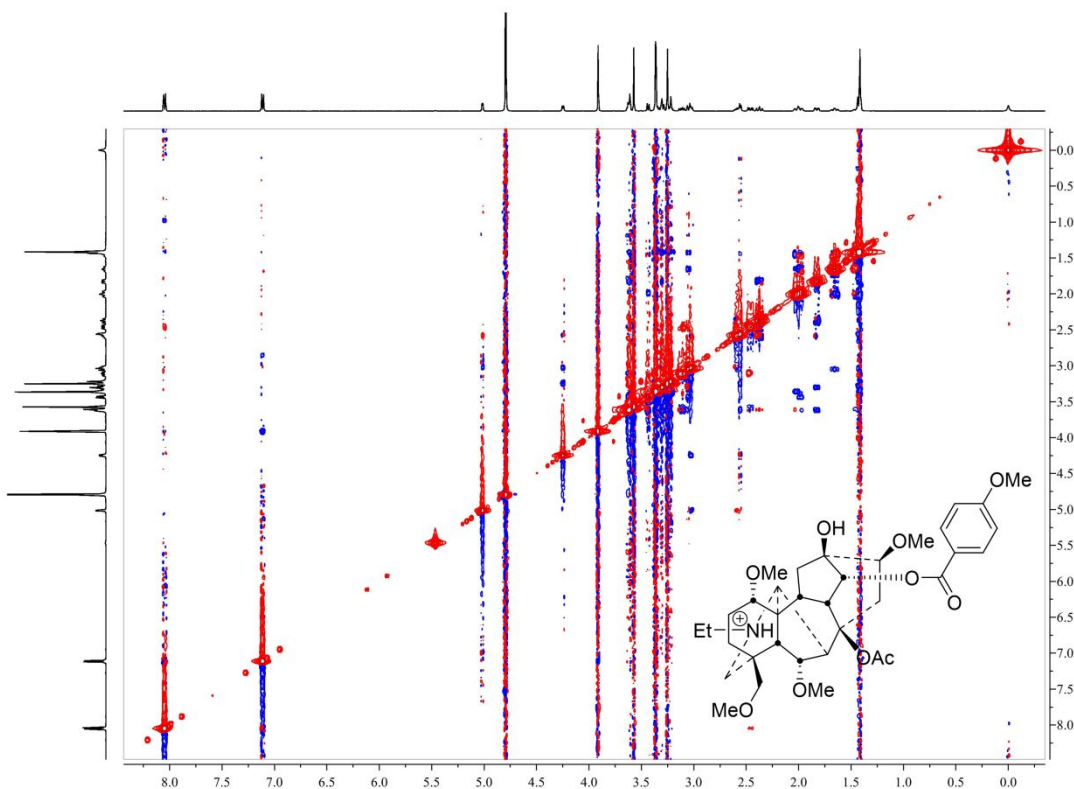

**Figure S106.** NOESY spectrum of crassicauline A HCl salt (**15'**) in D<sub>2</sub>O



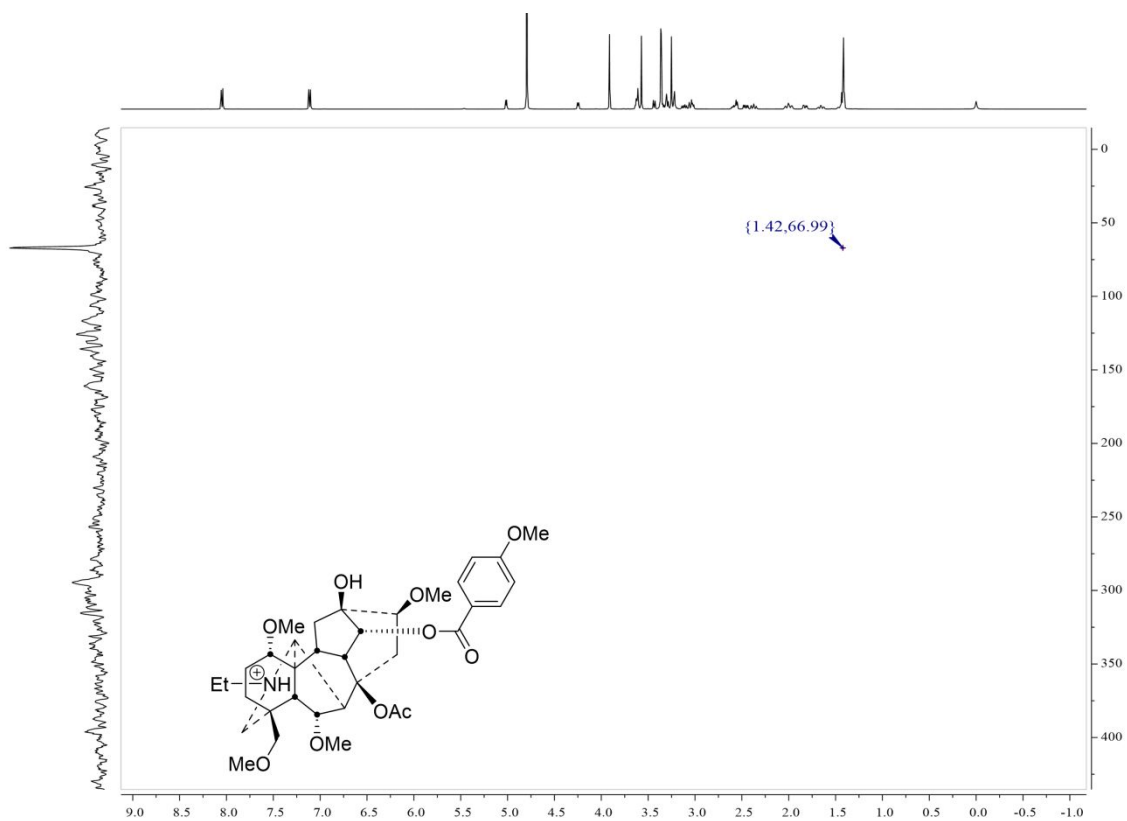

**Figure S107.**  $^1\text{H}$ - $^{15}\text{N}$  HMBC spectrum of crassicauline A HCl salt (**15'**) in  $\text{D}_2\text{O}$

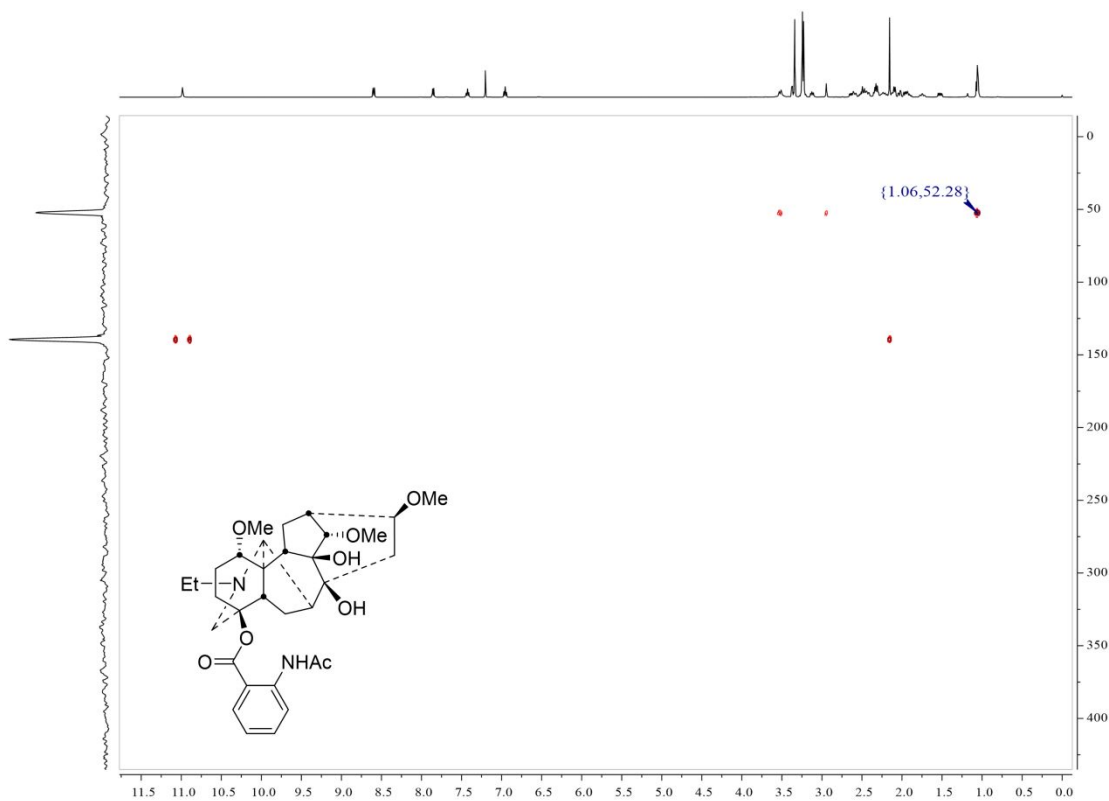

**Figure S108.**  $^1\text{H}$ - $^{15}\text{N}$  HMBC spectrum of lappaconitine (**16**) in  $\text{CDCl}_3$

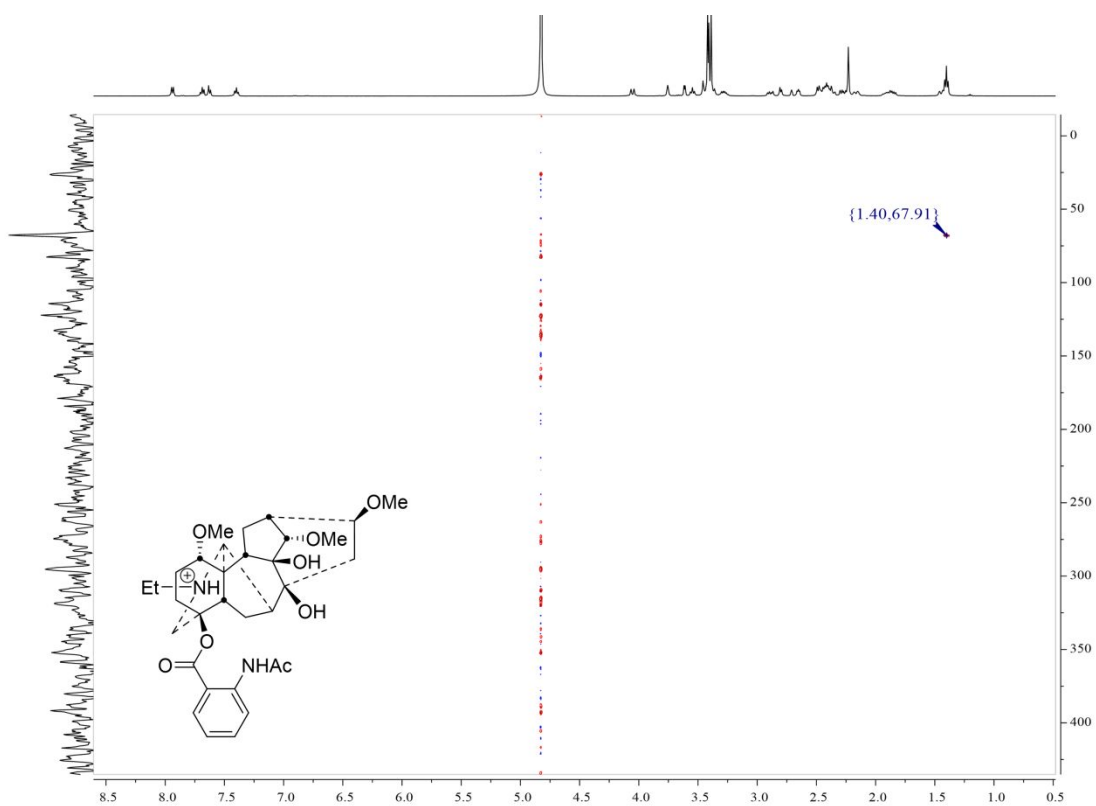

**Figure S109.**  $^1\text{H}$ - $^{15}\text{N}$  HMBC spectrum of lappaconitine HBr salt (**16'**) in  $\text{D}_2\text{O}$  (with additional 2 drops of  $d_6$ -DMSO)

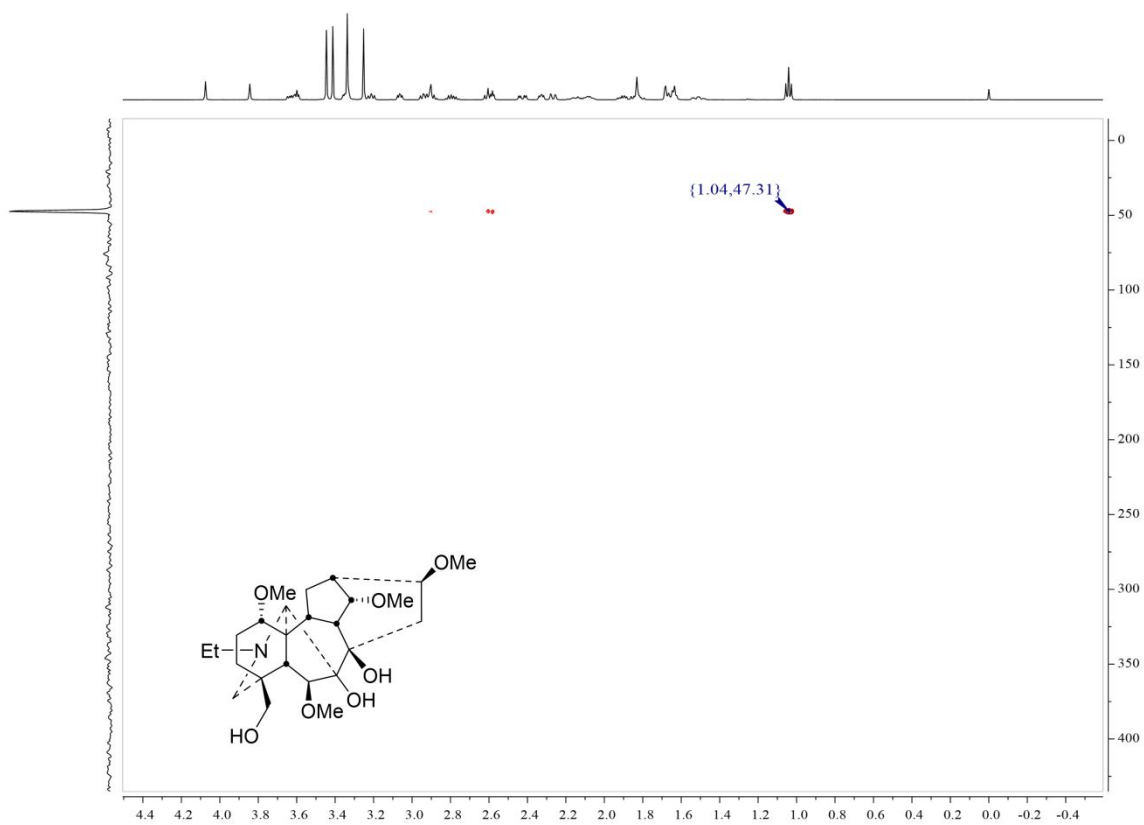

**Figure S110.**  $^1\text{H}$ - $^{15}\text{N}$  HMBC spectrum of lycoctonine (**17**) in  $\text{CDCl}_3$

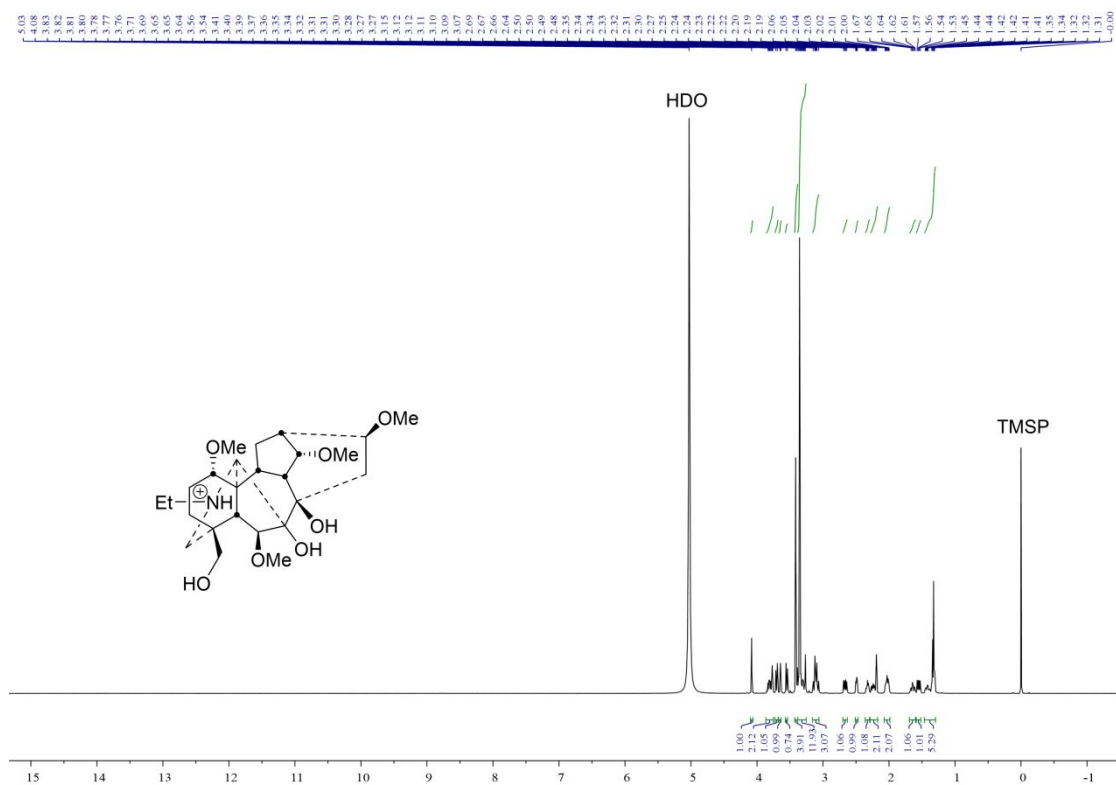

**Figure S111.** <sup>1</sup>H NMR spectrum of lycoctonine HCl salt (**17'**) in D<sub>2</sub>O (with additional 2 drops of *d*<sub>6</sub>-DMSO and drops of DCl in 35% in D<sub>2</sub>O, pD ~2)

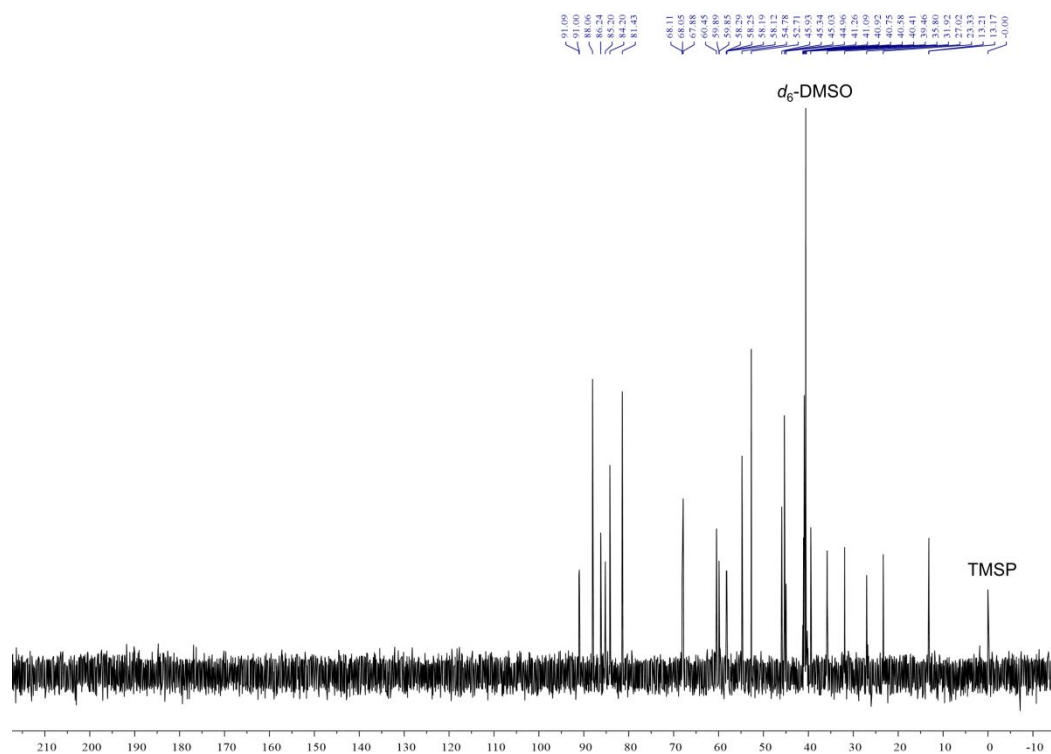

**Figure S112.** <sup>13</sup>C NMR spectrum of lycoctonine HCl salt (**17'**) in D<sub>2</sub>O (with additional 2 drops of *d*<sub>6</sub>-DMSO and drops of DCl in 35% in D<sub>2</sub>O, pD ~2)

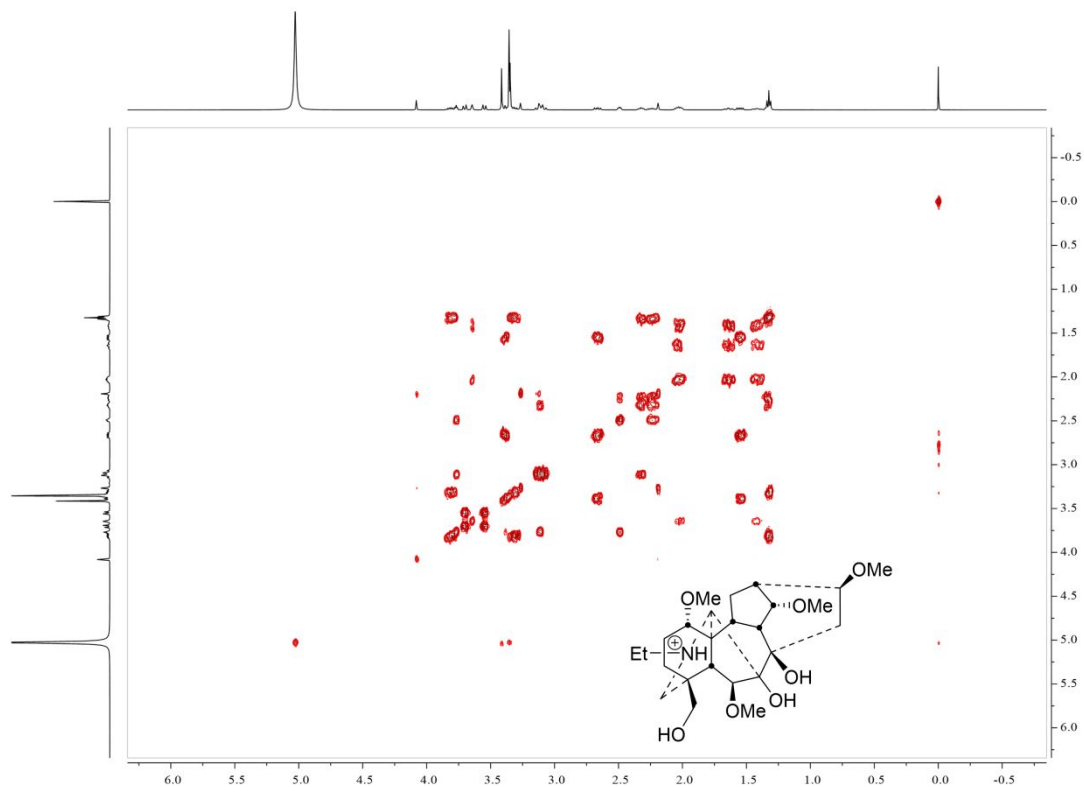

**Figure S113.** COSY spectrum of lycoctonine HCl salt (**17'**) in D<sub>2</sub>O (with additional 2 drops of *d*<sub>6</sub>-DMSO and drops of DCl in 35% in D<sub>2</sub>O, pD ~2)

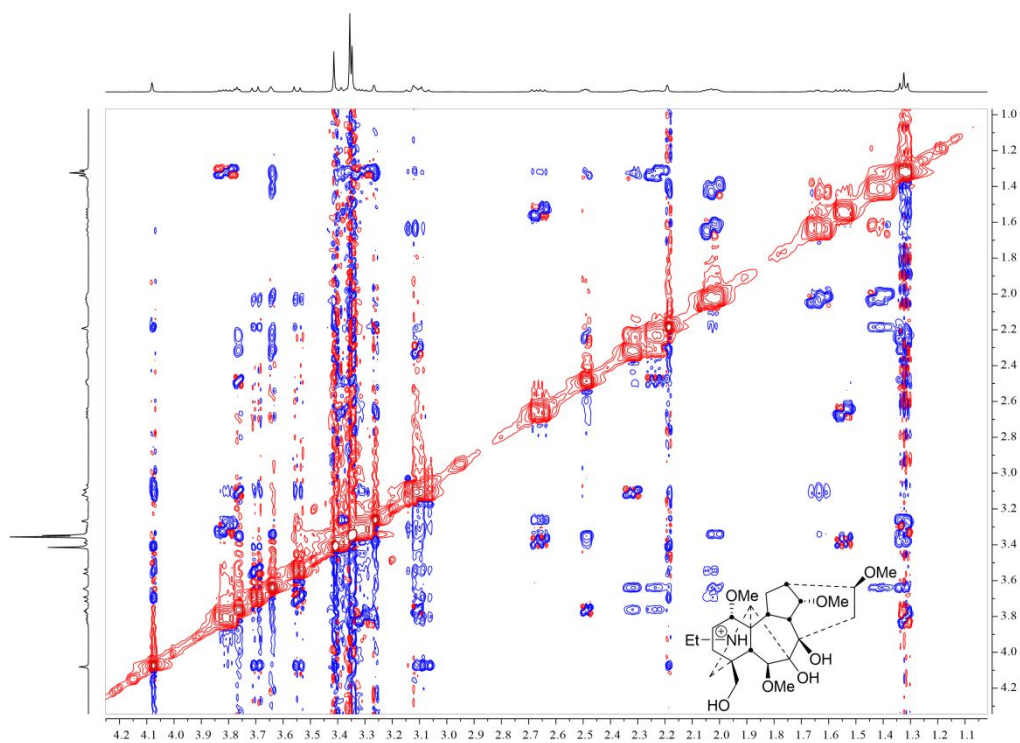

**Figure S114.** NOESY spectrum of lycoctonine HCl salt (**17'**) in D<sub>2</sub>O (with additional 2 drops of *d*<sub>6</sub>-DMSO and drops of DCl in 35% in D<sub>2</sub>O, pD ~2)

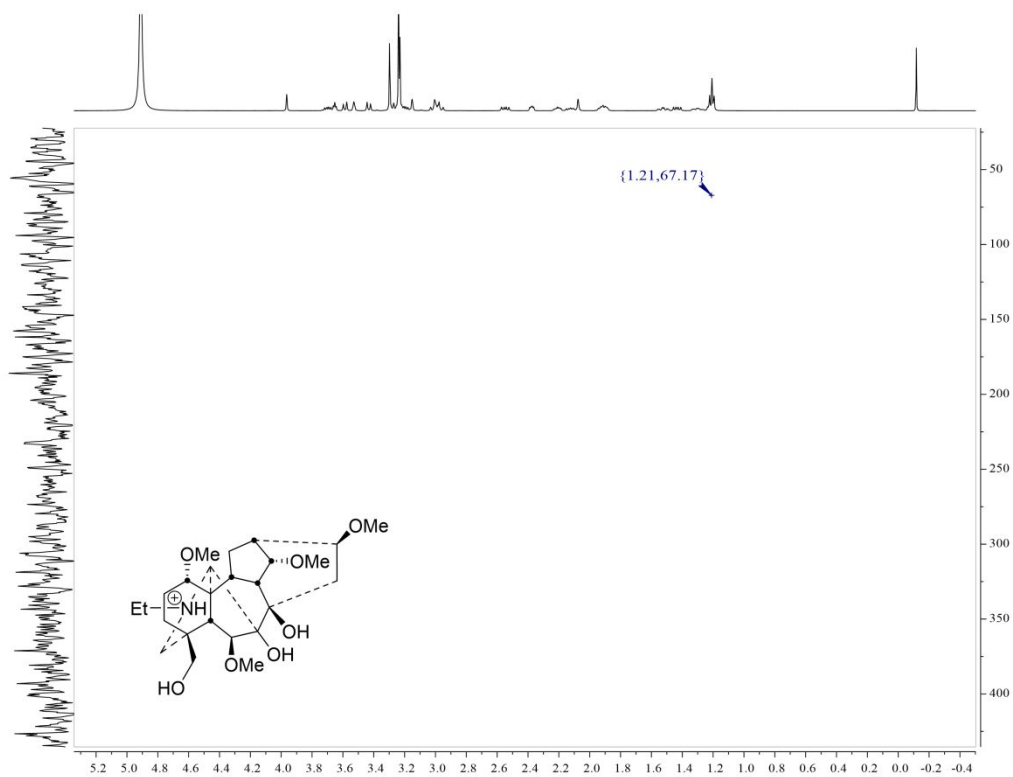

**Figure S115.**  $^1\text{H}$ - $^{15}\text{N}$  HMBC spectrum of lycoctonine HCl salt (**17'**) in  $\text{D}_2\text{O}$  (with additional 2 drops of  $d_6$ -DMSO and drops of DCl in 35% in  $\text{D}_2\text{O}$ , pD  $\sim$ 2)

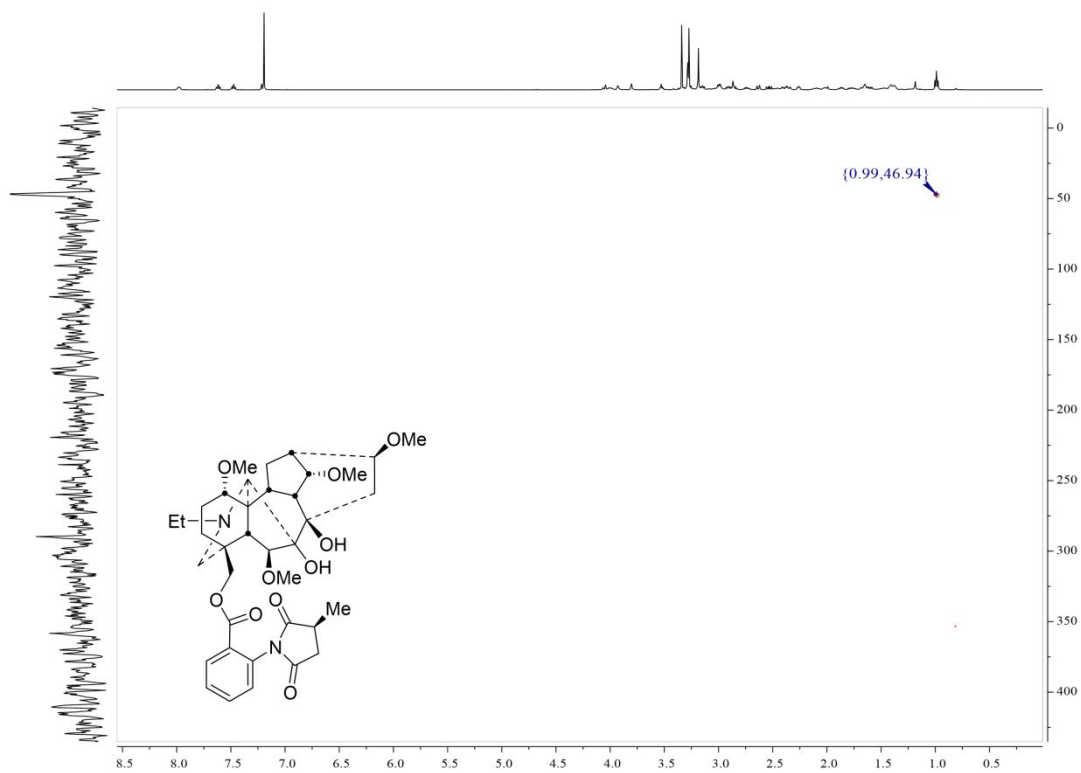

**Figure S116.**  $^1\text{H}$ - $^{15}\text{N}$  HMBC spectrum of MLA perchlorate (**18**) in  $\text{CDCl}_3$

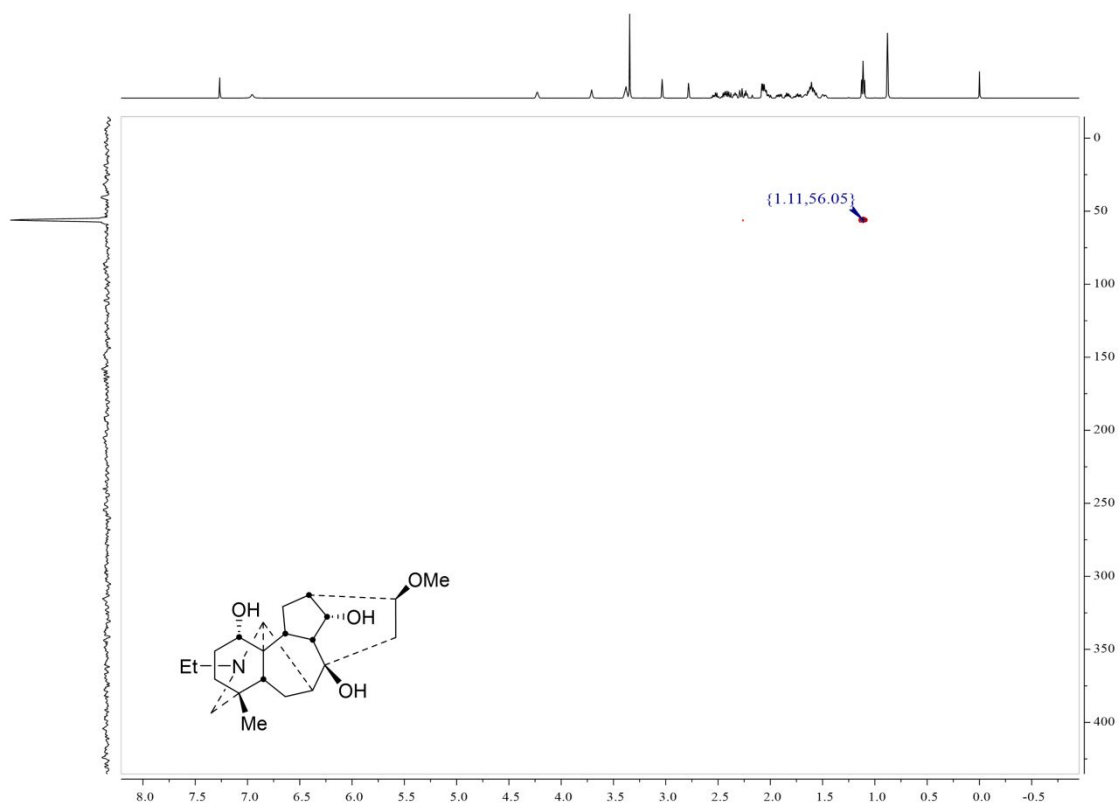

**Figure S117.**  $^1\text{H}$ - $^{15}\text{N}$  HMBC spectrum of karacoline (**19**) in  $\text{CDCl}_3$

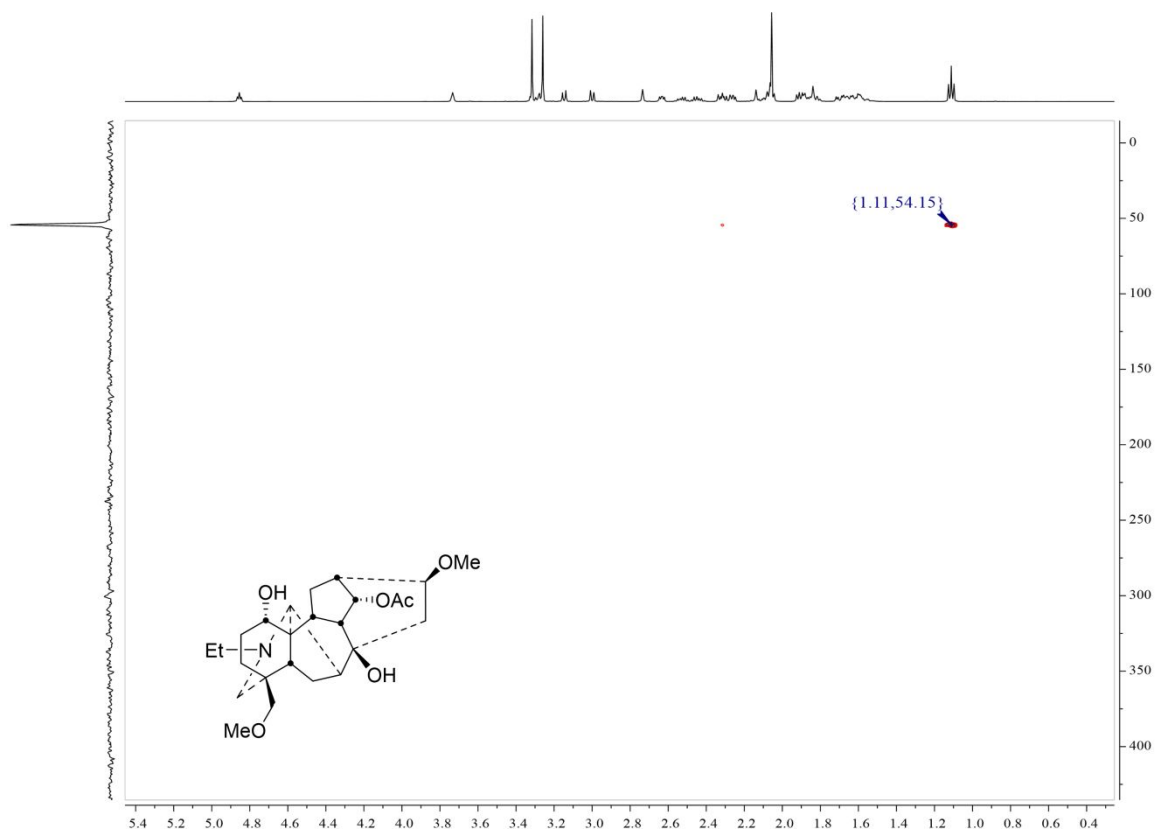

**Figure S118.**  $^1\text{H}$ - $^{15}\text{N}$  HMBC spectrum of condelphine (**20**) in  $\text{CDCl}_3$

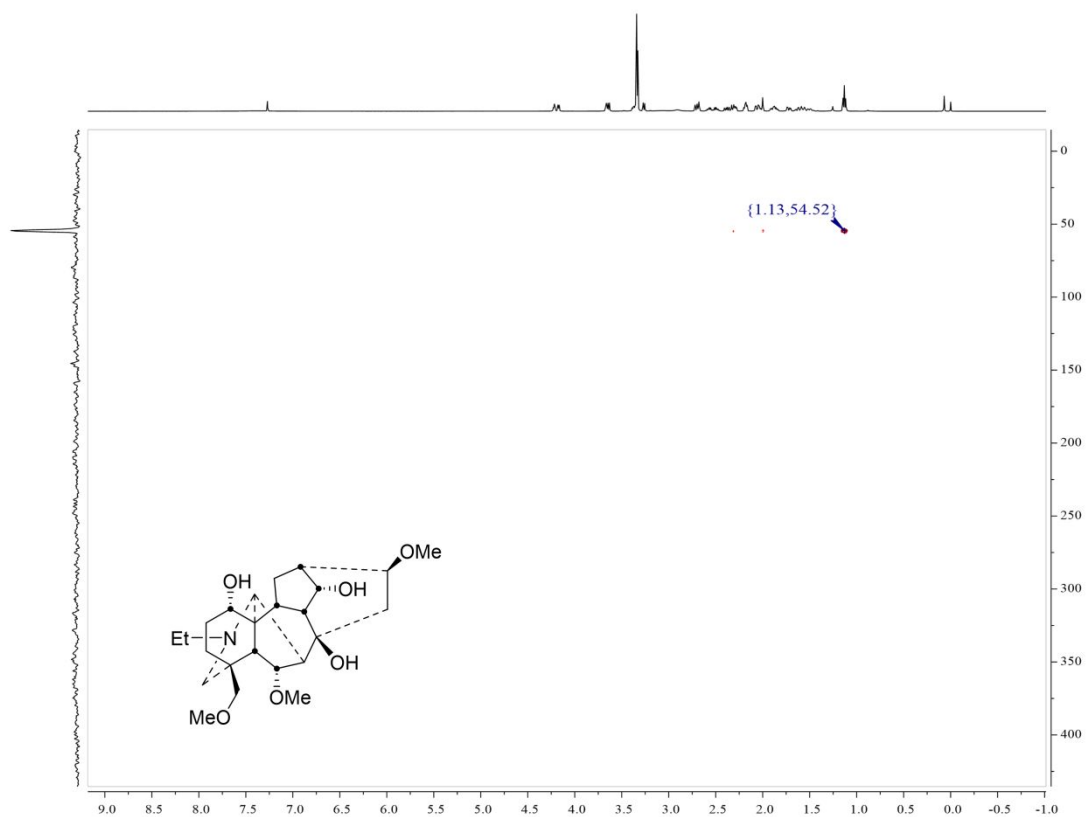

**Figure S119.**  $^1\text{H}$ - $^{15}\text{N}$  HMBC spectrum of neoline (**21**) in  $\text{CDCl}_3$

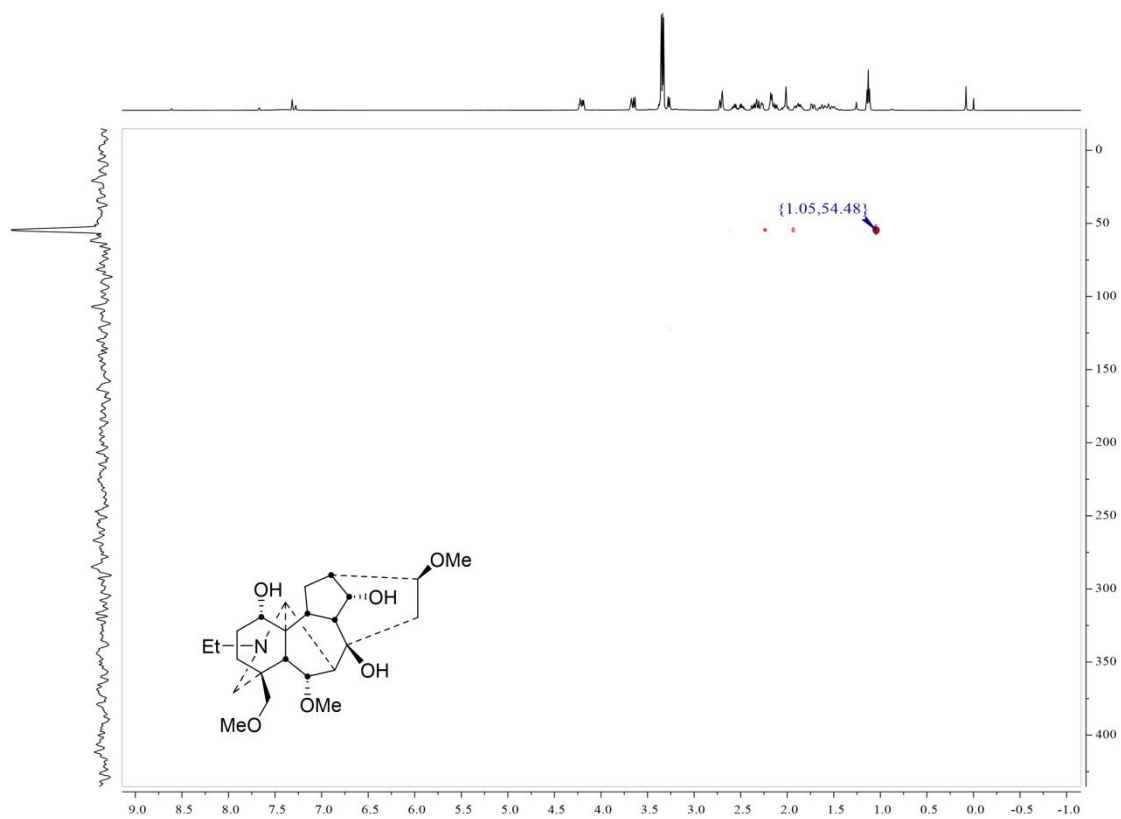

**Figure S120.**  $^1\text{H}$ - $^{15}\text{N}$  HMBC spectrum of neoline (**21**) in  $\text{CDCl}_3$  with additional 2 drops of  $d_5$ -pyridine

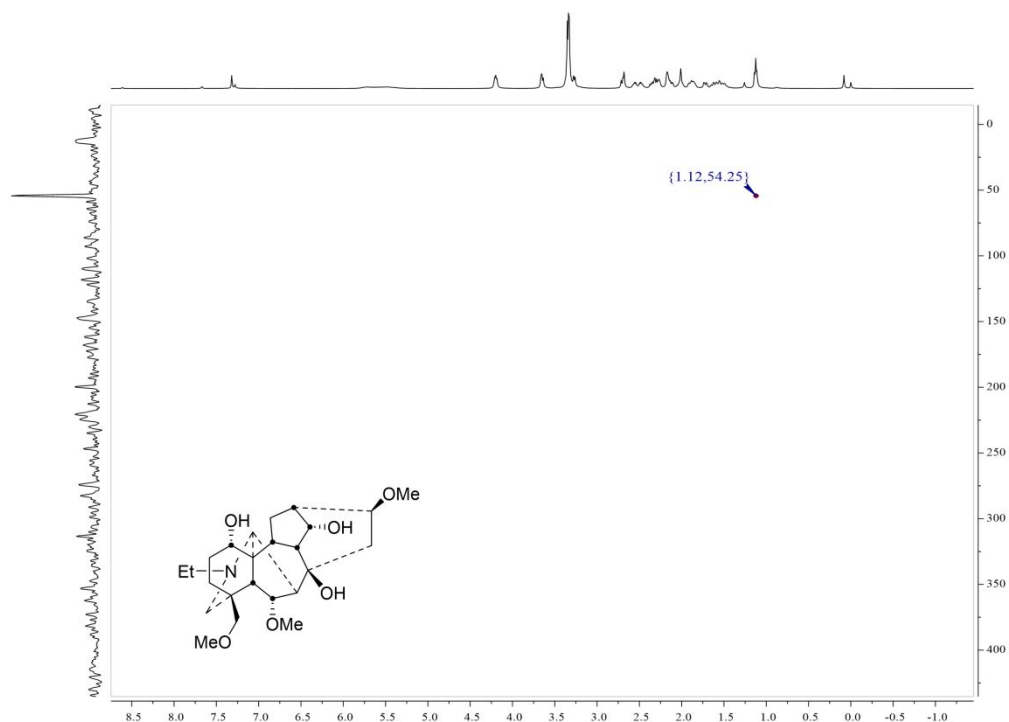

**Figure S121.**  $^1\text{H}$ - $^{15}\text{N}$  HMBC spectrum of neoline (**21**) in  $\text{CDCl}_3$  with additional 2 drops of  $d_5$ -pyridine and 2 drops of NaOD solution (30% in  $\text{D}_2\text{O}$ , w/w)

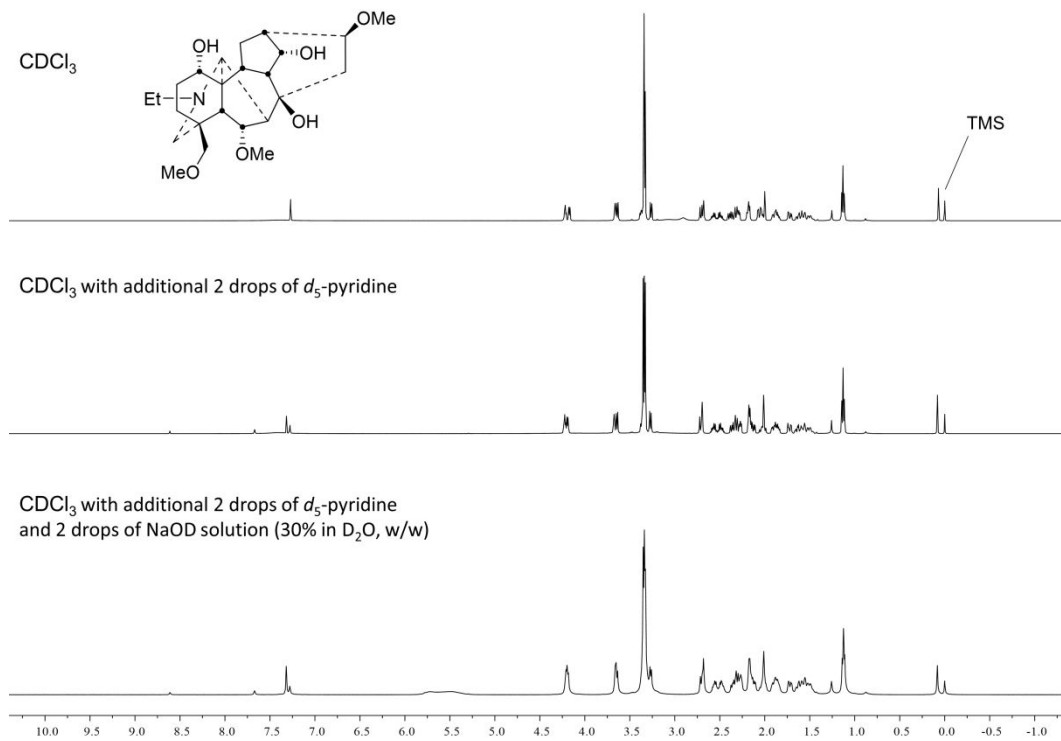

**Figure S121.** Comparison of  $^1\text{H}$  NMR spectra between those of neoline (**21**) in  $\text{CDCl}_3$ , in  $\text{CDCl}_3$  with additional 2 drops of  $d_5$ -pyridine, and in  $\text{CDCl}_3$  with additional 2 drops of  $d_5$ -pyridine and 2 drops of NaOD solution (30% in  $\text{D}_2\text{O}$ , w/w)
